# Supplementary material for: Comparative machine learning and deep learning frameworks for robust carcinogenicity prediction and activity cliff analysis
Source: Royal Society of Chemistry journal article supplement (doi:10.1039/d5em01001b), 2026-01-01
Supplement: d5em01001b1.zip [file si-1 revised.xlsx]

## Sheet: TITLE
			Comparative Machine Learning and Deep
				Learning Frameworks for Robust
			Carcinogenicity Prediction and Activity Cliffs
						Analysis
					Arkaprava Banerjee, Vinay Kumar, Kunal Roy*
			Drug Theoretics and Cheminformatics Laboratory, Department of Pharmaceutical
				Technology, Jadavpur University, Kolkata 700 032, India
				Supplementary Information SI-1
							*Correspondence to: Kunal Roy (kunal.roy@jadavpuruniversity.in; kunalroy_in@yahoo.com)

## Sheet: Dataset
No.	Compound Name	Smiles	Response
1	Acetaldehyde	CC=O	1
2	Acetaldehyde oxime	CC=NO	0
3	Acetamide	CC(=O)N	1
4	Acetohexamide	CC(=O)C1=CC=C(C=C1)S(=O)(=O)NC(=O)NC2CCCCC2	0
5	Acetone[4-(5-nitro-2-furyl)-2-thiazolyl] hydrazone	CC(=NNC1=NC=C(S1)C2=CC=C(O2)[N+](=O)[O-])C	1
6	Acetonitrile	CC#N	0
7	Acetoxime	CC(=NO)C	1
8	1'-Acetoxysafrole	CC(=O)OC(C=C)C1=CC2=C(C=C1)OCO2	1
9	4-Acetylaminobiphenyl	CC(=O)NC1=CC=C(C=C1)C2=CC=CC=C2	1
10	1-Acetylaminofluorene	CC(=O)NC1=CC=CC2=C1CC3=CC=CC=C32	0
11	2-Acetylaminofluorene	CC(=O)NC1=CC2=C(C=C1)C3=CC=CC=C3C2	1
12	4-Acetylaminofluorene	CC(=O)NC1=CC=CC2=C1C3=CC=CC=C3C2	0
13	4-Acetylaminophenylacetic acid	CC(=O)NC1=CC=C(C=C1)CC(=O)O	0
14	N-acetylcysteine	CC(=O)N[C@@H](CS)C(=O)O	0
15	Acrolein	C=CC=O	0
16	Acrolein diethylacetal	CCOC(C=C)OCC	0
17	Acrolein oxime	C=C/C=N/O	0
18	Acronycine	CC1(C=CC2=C3C(=C(C=C2O1)OC)C(=O)C4=CC=CC=C4N3C)C	1
19	Acrylamide	C=CC(=O)N	1
20	Acrylic acid	C=CC(=O)O	0
21	Acrylonitrile	C=CC#N	1
22	Actinomycin D	C[C@@H]1[C@@H](C(=O)N[C@@H](C(=O)N2CCC[C@H]2C(=O)N(CC(=O)N([C@H](C(=O)O1)C(C)C)C)C)C(C)C)NC(=O)C3=C4C(=C(C=C3)C)OC5=C(C(=O)C(=C(C5=N4)C(=O)N[C@H]6[C@H](OC(=O)[C@@H](N(C(=O)CN(C(=O)[C@@H]7CCCN7C(=O)[C@H](NC6=O)C(C)C)C)C)C(C)C)C)N)C	1
23	Adipamide	C(CCC(=O)N)CC(=O)N	0
24	AF-2	C1=COC(=C1)/C(=C/C2=CC=C(O2)[N+](=O)[O-])/C(=O)N	1
25	Aflatoxicol	COC1=C2C3=C([C@H](CC3)O)C(=O)OC2=C4[C@@H]5C=CO[C@@H]5OC4=C1	1
26	Aflatoxin-B1	COC1=C2C3=C(C(=O)CC3)C(=O)OC2=C4C5C=COC5OC4=C1	1
27	Alclofenac	C=CCOC1=C(C=C(C=C1)CC(=O)O)Cl	0
28	Aldicarb	CC(C)(/C=N/OC(=O)NC)SC	0
29	Allantoin	C1(C(=O)NC(=O)N1)NC(=O)N	0
30	Allyl alcohol	C=CCO	0
31	Allyl glycidyl ether	C=CCOCC1CO1	0
32	Allyl isothiocyanate	C=CCN=C=S	1
33	Allyl isovalerate	CC(C)CC(=O)OCC=C	1
34	1-Allyl-1-nitrosourea	C=CCN(C(=O)N)N=O	1
35	1-Amino-2,4-dibromoanthraquinone	C1=CC=C2C(=C1)C(=O)C3=C(C2=O)C(=C(C=C3Br)Br)N	1
36	3-Amino-4-ethoxyacetanilide	CCOC1=C(C=C(C=C1)NC(=O)C)N	0
37	1-Amino-2-methylanthraquinone	CC1=C(C2=C(C=C1)C(=O)C3=CC=CC=C3C2=O)N	1
38	2-Amino-5-(5-nitro-2-furyl)-1,3,4-oxadiazole	C1=C(OC(=C1)[N+](=O)[O-])C2=NN=C(O2)N	1
39	2-Amino-5-(5-nitro-2-furyl)-1,3,4-thiadiazole	C1=C(OC(=C1)[N+](=O)[O-])C2=NN=C(S2)N	1
40	2-Amino-4-(5-nitro-2-furyl)thiazole	C1=C(OC(=C1)[N+](=O)[O-])C2=CSC(=N2)N	1
41	2-Amino-4-nitrophenol	C1=CC(=C(C=C1[N+](=O)[O-])N)O	1
42	2-Amino-5-nitrophenol	C1=CC(=C(C=C1[N+](=O)[O-])O)N	1
43	4-Amino-2-nitrophenol	C1=CC(=C(C=C1N)[N+](=O)[O-])O	1
44	2-Amino-5-nitrothiazole	C1=C(SC(=N1)N)[N+](=O)[O-]	1
45	2-Aminoanthraquinone	C1=CC=C2C(=C1)C(=O)C3=C(C2=O)C=C(C=C3)N	1
46	o-Aminoazotoluene	CC1=CC=CC=C1N=NC2=CC(=C(C=C2)N)C	1
47	6-Aminocaproic acid	C(CCC(=O)O)CCN	0
48	1-(Aminomethyl)cyclohexaneacetic acid	C1CCC(CC1)(CC(=O)O)CN	1
49	3-Aminotriazole	C1=NNC(=N1)N	1
50	11-Aminoundecanoic acid	C(CCCCCN)CCCCC(=O)O	1
51	Amobarbital	CCC1(C(=O)NC(=O)NC1=O)CCC(C)C	0
52	1-Amyl-1-nitrosourea	CCCCCN(C(=O)N)N=O	1
53	Benzene, 1-methoxy-4-(1E)-1-propenyl-	C/C=C/C1=CC=C(C=C1)OC	0
54	Anilazine	C1=CC=C(C(=C1)NC2=NC(=NC(=N2)Cl)Cl)Cl	0
55	Aniline	C1=CC=C(C=C1)N	0
56	o-Anthranilic acid	C1=CC=C(C(=C1)C(=O)O)N	0
57	Aramite	CC(COC1=CC=C(C=C1)C(C)(C)C)OS(=O)OCCCl	1
58	L-Ascorbic acid	C([C@@H]([C@@H]1C(=C(C(=O)O1)O)O)O)O	0
59	Aspartame	COC(=O)[C@H](CC1=CC=CC=C1)NC(=O)[C@H](CC(=O)O)N	0
60	Acetylsalicylic acid	CC(=O)OC1=CC=CC=C1C(=O)O	0
61	Astemizole	COC1=CC=C(C=C1)CCN2CCC(CC2)NC3=NC4=CC=CC=C4N3CC5=CC=C(C=C5)F	0
62	Atrazine	CCNC1=NC(=NC(=N1)Cl)NC(C)C	1
63	Atropine	CN1[C@@H]2CC[C@H]1CC(C2)OC(=O)C(CO)C3=CC=CC=C3	0
64	6-Azacytidine	C1=NN(C(=O)N=C1N)[C@H]2[C@@H]([C@@H]([C@H](O2)CO)O)O	0
65	Azaserine	C([C@@H](C(=O)O)N)OC(=O)C=[N+]=[N-]	1
66	Azathioprine	CN1C=NC(=C1SC2=NC=NC3=C2NC=N3)[N+](=O)[O-]	0
67	Azelnidipine	CC1=C(C(C(=C(N1)N)C(=O)OC2CN(C2)C(C3=CC=CC=C3)C4=CC=CC=C4)C5=CC(=CC=C5)[N+](=O)[O-])C(=O)OC(C)C	0
68	Azinphosmethyl	COP(=S)(OC)SCN1C(=O)C2=CC=CC=C2N=N1	0
69	Azobenzene	C1=CC=C(C=C1)N=NC2=CC=CC=C2	1
70	Azoxymethane	CN=[N+](C)[O-]	1
71	1-Azoxypropane	CCCN=[N+](CCC)[O-]	1
72	2-Azoxypropane	CC(C)N=[N+](C(C)C)[O-]	1
73	3'-Azido-3'-deoxythymidine (AIDS)	CC1=CN(C(=O)NC1=O)[C@H]2C[C@@H]([C@H](O2)CO)N=[N+]=[N-]	1
74	Barbituric acid	C1C(=O)NC(=O)NC1=O	0
75	Bemitradine	CCOCCC1=C(N=C(N2C1=NC=N2)N)C3=CC=CC=C3	1
76	Benzalazine	C1=CC=C(C=C1)C=NN=CC2=CC=CC=C2	0
77	Benzaldehyde	C1=CC=C(C=C1)C=O	0
78	Benzene	C1=CC=CC=C1	1
79	Benzidine	C1=CC(=CC=C1C2=CC=C(C=C2)N)N	1
80	Benzo(a)pyrene	C1=CC=C2C3=C4C(=CC2=C1)C=CC5=C4C(=CC=C5)C=C3	1
81	Benzofuran	C1=CC=C2C(=C1)C=CO2	1
82	1,3,5-Triazine-2,4-diamine, 6-phenyl-	C1=CC=C(C=C1)C2=NC(=NC(=N2)N)N	0
83	Benzoic acid	C1=CC=C(C=C1)C(=O)O	0
84	Benzoin	C1=CC=C(C=C1)C(C(=O)C2=CC=CC=C2)O	0
85	1,2,3-Benzotriazole	C1=CC2=NNN=C2C=C1	0
86	Benzyl acetate	CC(=O)OCC1=CC=CC=C1	0
87	Benzyl alcohol	C1=CC=C(C=C1)CO	0
88	Benzyl chloride	C1=CC=C(C=C1)CCl	0
89	o-Benzyl-p-chlorophenol	C1=CC=C(C=C1)CC2=C(C=CC(=C2)Cl)O	0
90	Benzyl isothiocyanate	C1=CC=C(C=C1)CN=C=S	0
91	Benzyl thiocyanate	C1=CC=C(C=C1)CSC#N	0
92	3-Benzylsydnone-4-acetamide	C1=CC=C(C=C1)C[N+]2=NOC(=C2CC(=O)N)[O-]	1
93	2,2-Bis(bromomethyl)-1,3-propanediol, technical grade	C(C(CO)(CBr)CBr)O	1
94	Bis(2-chloro-1-methylethyl)ether, technical grade	CC(CCl)OC(C)CCl	0
95	Bis(chloromethyl) ether	C(OCCl)Cl	1
96	1,4-Bis[2-(3,5-dichloropyridyloxy)]benzene	C1=CC(=CC=C1OC2=C(C=C(C=N2)Cl)Cl)OC3=C(C=C(C=N3)Cl)Cl	0
97	4-Bis(2-hydroxyethyl)amino-2-(5-nitro-2-thienyl)quinazoline	C1=CC=C2C(=C1)C(=NC(=N2)C3=CC=C(S3)[N+](=O)[O-])N(CCO)CCO	1
98	4-Bis(2-hydroxyethyl)amino-2-(2-thienyl)quinazoline	C1=CC=C2C(=C1)C(=NC(=N2)C3=CC=CS3)N(CCO)CCO	0
99	Diisopropanolamine	CC(CNCC(C)O)O	0
100	Bisphenol A	CC(C)(C1=CC=C(C=C1)O)C2=CC=C(C=C2)O	0
101	C.I. Disperse blue 1	C1=CC(=C2C(=C1N)C(=O)C3=C(C=CC(=C3C2=O)N)N)N	1
102	HC blue 1	CNC1=C(C=C(C=C1)N(CCO)CCO)[N+](=O)[O-]	1
103	HC blue 2	C1=CC(=C(C=C1N(CCO)CCO)[N+](=O)[O-])NCCO	0
104	Bromodichloromethane	C(Cl)(Cl)Br	1
105	Bromoethane (ethyl bromide)	CCBr	1
106	Budesonide	CCCC1O[C@@H]2C[C@H]3[C@@H]4CCC5=CC(=O)C=C[C@@]5([C@H]4[C@H](C[C@@]3([C@@]2(O1)C(=O)CO)C)O)C	1
107	1,3-Butadiene	C=CC=C	1
108	tert-Butyl alcohol	CC(C)(C)O	1
109	Butyl benzyl phthalate	CCCCOC(=O)C1=CC=CC=C1C(=O)OCC2=CC=CC=C2	1
110	n-Butyl chloride	CCCCCl	0
111	n-Butyl-N-(4-hydroxybutyl)nitrosamine	CCCCN(CCCCO)N=O	1
112	di-tert-Butyl-4-hydroxymethyl phenol	CC(C)(C)C1=CC(=CC(=C1O)C(C)(C)C)CO	0
113	Phenol, 2-(1,1-dimethylethyl)-4-methyl-	CC1=CC(=C(C=C1)O)C(C)(C)C	0
114	N-Butyl-N'-nitro-N-nitrosoguanidine	CCCCN(C(=N)N[N+](=O)[O-])N=O	0
115	N-n-Butyl-N-nitrosourea	CCCCN(C(=O)N)N=O	1
116	Butylated hydroxytoluene	CC1=CC(=C(C(=C1)C(C)(C)C)O)C(C)(C)C	0
117	Phenol, 4-(1,1-dimethylethyl)-	CC(C)(C)C1=CC=C(C=C1)O	0
118	N-Butylurea	CCCCNC(=O)N	0
119	beta-Butyrolactone	CC1CC(=O)O1	1
120	Gamma-butyrolactone	C1CC(=O)OC1	0
121	3,4-Dihydroxycinnamic acid	C1=CC(=C(C=C1/C=C/C(=O)O)O)O	1
122	Caffeine	CN1C=NC2=C1C(=O)N(C(=O)N2C)C	0
123	Candesartan cilexetil	CCOC1=NC2=CC=CC(=C2N1CC3=CC=C(C=C3)C4=CC=CC=C4C5=NNN=N5)C(=O)OC(C)OC(=O)OC6CCCCC6	0
124	Caprolactam	C1CCC(=O)NCC1	0
125	Captafol	C1C=CCC2C1C(=O)N(C2=O)SC(C(Cl)Cl)(Cl)Cl	1
126	Carbaryl	CNC(=O)OC1=CC=CC2=CC=CC=C21	1
127	Carbon tetrachloride	C(Cl)(Cl)(Cl)Cl	1
128	Carboxymethylnitrosourea	C(C(=O)O)N(C(=O)N)N=O	1
129	Carbromal	CCC(CC)(C(=O)NC(=O)N)Br	0
130	beta-Carotene	CC1=C(C(CCC1)(C)C)/C=C/C(=C/C=C/C(=C/C=C/C=C(/C=C/C=C(/C=C/C2=C(CCCC2(C)C)C)\C)\C)/C)/C	0
131	Catechol	C1=CC=C(C(=C1)O)O	1
132	Celiprolol	CCN(CC)C(=O)NC1=CC(=C(C=C1)OCC(CNC(C)(C)C)O)C(=O)C	0
133	Chloramben	C1=C(C=C(C(=C1C(=O)O)Cl)N)Cl	0
134	Chlorambucil	C1=CC(=CC=C1CCCC(=O)O)N(CCCl)CCCl	1
135	Chloramphenicol	C1=CC(=CC=C1[C@H]([C@@H](CO)NC(=O)C(Cl)Cl)O)[N+](=O)[O-]	0
136	Chlordane (analytical grade)	C1C2C(C(C1Cl)Cl)[C@]3(C(=C([C@@]2(C3(Cl)Cl)Cl)Cl)Cl)Cl	0
137	Chlorendic acid	C1(C(C2(C(=C(C1(C2(Cl)Cl)Cl)Cl)Cl)Cl)C(=O)O)C(=O)O	1
138	4-Chloro-4'-aminodiphenylether	C1=CC(=CC=C1N)OC2=CC=C(C=C2)Cl	1
139	3-Chloro-4-(dichloromethyl)-5-hydroxy-2(5H)-furanone(MX)	C1(C(=C(C(=O)O1)Cl)C(Cl)Cl)O	1
140	2-Chloro-5-(3,5-dimethylpiperidinosulphonyl)benzoic acid	CC1CC(CN(C1)S(=O)(=O)C2=CC(=C(C=C2)Cl)C(=O)O)C	1
141	Dinitrochlorobenzene	C1=CC(=C(C=C1[N+](=O)[O-])[N+](=O)[O-])Cl	0
142	2-Chloronitrobenzene	C1=CC=C(C(=C1)[N+](=O)[O-])Cl	0
143	4-Chloronitrobenzene	C1=CC(=CC=C1[N+](=O)[O-])Cl	0
144	4-Chloro-m-phenylenediamine	C1=CC(=C(C=C1N)N)Cl	1
145	4-Chloro-o-phenylenediamine	C1=CC(=C(C=C1Cl)N)N	1
146	3-Chloro-p-toluidine	CC1=C(C=C(C=C1)N)Cl	0
147	5-Chloro-o-toluidine	CC1=C(C=C(C=C1)Cl)N	0
148	2-Chloro-1,1,1-trifluoroethane	C(C(F)(F)F)Cl	1
149	(4-Chloro-6-(2,3-xylidino)-2-pyrimidinylthio) acetic acid (WY-14643)	CC1=C(C(=CC=C1)NC2=CC(=NC(=N2)SCC(=O)O)Cl)C	1
150	4-Chloro-6-(2,3-xylidino)-2-pyrimidinylthio(N-beta-hydroxyethyl)acetamide	CC1=C(C(=CC=C1)NC2=CC(=NC(=N2)SCC(=O)NCCO)Cl)C	1
151	2-Chloroacetophenone (CN)	C1=CC=C(C=C1)C(=O)CCl	0
152	4-(Chloroacetyl)acetanilide	CC(=O)NC1=CC=C(C=C1)C(=O)CCl	0
153	p-Chloroaniline	C1=CC(=CC=C1N)Cl	0
154	o-Chlorobenzalmalononitrile (CS)	C1=CC=C(C(=C1)C=C(C#N)C#N)Cl	0
155	Chlorobenzene	C1=CC=C(C=C1)Cl	1
156	Chlorobenzilate	CCOC(=O)C(C1=CC=C(C=C1)Cl)(C2=CC=C(C=C2)Cl)O	0
157	Chlorodibromomethane	C(Cl)(Br)Br	0
158	Methane, chlorodifluoro-	C(F)(F)Cl	0
159	Chloroethane	CCCl	0
160	Chlorofluoromethane	C(F)Cl	1
161	Chloromethyl methyl ether	COCCl	1
162	Monuron	CN(C)C(=O)NC1=CC=C(C=C1)Cl	1
163	(+-)-4-(2-chlorophenyl)-2-[2-(4-isobutylphenyl)ethyl]-6,9-dimethyl-6H-thieno[3,2-f][1,2,4]triazolo[4,3-a][1,4]diazepine	CC1C2=NN=C(N2C3=C(C=C(S3)CCC4=CC=C(C=C4)CC(C)C)C(=N1)C5=CC=CC=C5Cl)C	0
164	1-(4-Chlorophenyl)-1-phenyl-2-propynyl carbamate	C#CC(C1=CC=CC=C1)(C2=CC=C(C=C2)Cl)OC(=O)N	1
165	p-Chlorophenyl-2,4,5-trichlorophenyl sulfide	C1=CC(=CC=C1SC2=CC(=C(C=C2Cl)Cl)Cl)Cl	0
166	Chloroprene	C=CC(=C)Cl	1
167	Chlorothalonil	C(#N)C1=C(C(=C(C(=C1Cl)Cl)Cl)C#N)Cl	1
168	Chlorozotocin	C(CCl)N(C(=O)N[C@@H](C=O)[C@H]([C@@H]([C@@H](CO)O)O)O)N=O	1
169	Chlorpropamide	CCCNC(=O)NS(=O)(=O)C1=CC=C(C=C1)Cl	0
170	Danthron	C1=CC2=C(C(=C1)O)C(=O)C3=C(C2=O)C=CC=C3O	1
171	Cimetidine	CC1=C(N=CN1)CSCCNC(=NC)NC#N	0
172	Ciprofibrate	CC(C)(C(=O)O)OC1=CC=C(C=C1)C2CC2(Cl)Cl	1
173	1,2,3-Propanetricarboxylic acid, 2-hydroxy-	C(C(=O)O)C(CC(=O)O)(C(=O)O)O	0
174	Citrinin	C[C@@H]1[C@H](OC=C2C1=C(C(=C(C2=O)C(=O)O)O)C)C	1
175	Clobuzarit	CC(C)(C(=O)O)OCC1=CC=C(C=C1)C2=CC=C(C=C2)Cl	0
176	Clofibrate	CCOC(=O)C(C)(C)OC1=CC=C(C=C1)Cl	1
177	Codeine	CN1CC[C@]23[C@@H]4[C@H]1CC5=C2C(=C(C=C5)OC)O[C@H]3[C@H](C=C4)O	0
178	Colcemid	CN[C@H]1CCC2=CC(=C(C(=C2C3=CC=C(C(=O)C=C13)OC)OC)OC)OC	0
179	3-Hydroxyproquazone	CC1=CC2=C(C=C1)C(=NC(=O)N2C(C)C)C3=CC(=CC=C3)O	0
180	Coumaphos	CCOP(=S)(OCC)OC1=CC2=C(C=C1)C(=C(C(=O)O2)Cl)C	0
181	m-Cresidine	CC1=C(C=CC(=C1)OC)N	1
182	p-Cresidine	CC1=CC(=C(C=C1)OC)N	1
183	Crotonaldehyde	C/C=C/C=O	1
184	Guanidine, cyano-	C(#N)N=C(N)N	0
185	Cyclocytidine	C1=CN2[C@H]3[C@H]([C@@H]([C@H](O3)CO)O)OC2=NC1=N	0
186	beta-Cyclodextrin	C([C@@H]1[C@@H]2[C@@H]([C@H]([C@H](O1)O[C@@H]3[C@H](O[C@@H]([C@@H]([C@H]3O)O)O[C@@H]4[C@H](O[C@@H]([C@@H]([C@H]4O)O)O[C@@H]5[C@H](O[C@@H]([C@@H]([C@H]5O)O)O[C@@H]6[C@H](O[C@@H]([C@@H]([C@H]6O)O)O[C@@H]7[C@H](O[C@@H]([C@@H]([C@H]7O)O)O[C@@H]8[C@H](O[C@H](O2)[C@@H]([C@H]8O)O)CO)CO)CO)CO)CO)CO)O)O)O	0
187	Cyclohexanone	C1CCC(=O)CC1	0
188	Cyclopentanone oxime	C1CCC(=NO)C1	1
189	Cyclophosphamide	C1CNP(=O)(OC1)N(CCCl)CCCl	1
190	Cyclosporin A	CC[C@H]1C(=O)N(CC(=O)N([C@H](C(=O)N[C@H](C(=O)N([C@H](C(=O)N[C@H](C(=O)N[C@@H](C(=O)N([C@H](C(=O)N([C@H](C(=O)N([C@H](C(=O)N([C@H](C(=O)N1)[C@@H]([C@H](C)C/C=C/C)O)C)C(C)C)C)CC(C)C)C)CC(C)C)C)C)C)CC(C)C)C)C(C)C)CC(C)C)C)C	0
191	Dacarbazine	CN(C)/N=N/C1=C(NC=N1)C(=O)N	1
192	4,4'-Sulfonyldianiline (Dapsone)	C1=CC(=CC=C1N)S(=O)(=O)C2=CC=C(C=C2)N	1
193	Tetrachlorodiphenylethane	C1=CC(=CC=C1C(C2=CC=C(C=C2)Cl)C(Cl)Cl)Cl	0
194	p,p'-Dichlorodiphenyl dichloroethylene	C1=CC(=CC=C1C(=C(Cl)Cl)C2=CC=C(C=C2)Cl)Cl	0
195	Dichlorodiphenyltrichloroethane (DDT)	C1=CC(=CC=C1C(C2=CC=C(C=C2)Cl)C(Cl)(Cl)Cl)Cl	1
196	Decabromodiphenyl oxide	C1(=C(C(=C(C(=C1Br)Br)Br)Br)Br)OC2=C(C(=C(C(=C2Br)Br)Br)Br)Br	1
197	Deflazacort	CC1=N[C@@]2([C@H](O1)C[C@@H]3[C@@]2(C[C@@H]([C@H]4[C@H]3CCC5=CC(=O)C=C[C@]45C)O)C)C(=O)COC(=O)C	0
198	Dehydroepiandrosterone	C[C@]12CC[C@H]3[C@H]([C@@H]1CCC2=O)CC=C4[C@@]3(CC[C@@H](C4)O)C	1
199	Dehydroepiandrosterone acetate	CC(=O)O[C@H]1CC[C@@]2([C@H]3CC[C@]4([C@H]([C@@H]3CC=C2C1)CCC4=O)C)C	1
200	Deltamethrin	CC1([C@H]([C@H]1C(=O)O[C@H](C#N)C2=CC(=CC=C2)OC3=CC=CC=C3)C=C(Br)Br)C	0
201	Deserpidine	CO[C@H]1[C@@H](C[C@@H]2CN3CCC4=C([C@H]3C[C@@H]2[C@@H]1C(=O)OC)NC5=CC=CC=C45)OC(=O)C6=CC(=C(C(=C6)OC)OC)OC	0
202	Dexamethazone	C[C@@H]1C[C@H]2[C@@H]3CCC4=CC(=O)C=C[C@@]4([C@]3([C@H](C[C@@]2([C@]1(C(=O)CO)O)C)O)F)C	0
203	N-1-Diacetamidofluorene	CC(=O)N(C1=CC=CC2=C1CC3=CC=CC=C32)C(=O)C	1
204	Diallyl phthalate	C=CCOC(=O)C1=CC=CC=C1C(=O)OCC=C	0
205	Diallylnitrosamine	C=CCN(CC=C)N=O	1
206	4,6-Diamino-2-(5-nitro-2-furyl)-s-triazine	C1=C(OC(=C1)[N+](=O)[O-])C2=NC(=NC(=N2)N)N	1
207	2,4-Diaminotoluene (2,4-toluene diamine)	CC1=C(C=C(C=C1)N)N	1
208	Diazepam	CN1C(=O)CN=C(C2=C1C=CC(=C2)Cl)C3=CC=CC=C3	0
209	Diazinon	CCOP(=S)(OCC)OC1=NC(=NC(=C1)C)C(C)C	0
210	Dibenzo-p-dioxin	C1=CC=C2C(=C1)OC3=CC=CC=C3O2	0
211	3-Dibenzofuranamine	C1=CC=C2C(=C1)C3=C(O2)C=C(C=C3)N	1
212	1,2-Dibromo-3-chloropropane	C(C(CBr)Br)Cl	1
213	Dibromodulcitol	C([C@H]([C@@H]([C@@H]([C@H](CBr)O)O)O)O)Br	1
214	1,2-Dibromoethane	C(CBr)Br	1
215	5,7-Dibromoquinoline	C1=CC2=C(C=C(C=C2Br)Br)N=C1	0
216	1,3-Dibutyl-1-nitrosourea	CCCCNC(=O)N(CCCC)N=O	1
217	Ethane, 1,1-dichloro-1-fluoro-	CC(F)(Cl)Cl	1
218	2,6-Dichloro-p-phenylenediamine	C1=C(C=C(C(=C1Cl)N)Cl)N	0
219	Dichloroacetic acid	C(C(=O)O)(Cl)Cl	1
220	Dichloroacetylene	C(#CCl)Cl	1
221	1,2-Dichlorobenzene (o-dichlorobenzene)	C1=CC=C(C(=C1)Cl)Cl	0
222	1,4-Dichlorobenzene (p-dichlorobenzene)	C1=CC(=CC=C1Cl)Cl	1
223	3,3'-Dichlorobenzidine	C1=CC(=C(C=C1C2=CC(=C(C=C2)N)Cl)Cl)N	1
224	2,7-Dichlorodibenzo-p-dioxin	C1=CC2=C(C=C1Cl)OC3=C(O2)C=C(C=C3)Cl	0
225	Methane, dichlorodifluoro-	C(F)(F)(Cl)Cl	0
226	1,1-Dichloroethane	CC(Cl)Cl	0
227	1,2-Dichloroethane	C(CCl)Cl	1
228	2,4-Dichlorophenol	C1=CC(=C(C=C1Cl)Cl)O	0
229	2,4-Dichlorophenoxyacetic acid	C1=CC(=C(C=C1Cl)Cl)OCC(=O)O	0
230	1,2-Dichloropropane (propylene dichloride)	CC(CCl)Cl	0
231	Dichlorvos	COP(=O)(OC)OC=C(Cl)Cl	1
232	Dicofol	C1=CC(=CC=C1C(C2=CC=C(C=C2)Cl)(C(Cl)(Cl)Cl)O)Cl	0
233	N,N'-Dicyclohexylthiourea	C=CCNC(=S)N(C1CCCCC1)C2CCCCC2	0
234	Dicyclopentadiene dioxide	C1C2C3CC4C(C3C1C5C2O5)O4	0
235	Photodieldrin	[C@H]12[C@H]3[C@H]([C@H]4[C@@H]1[C@]5([C@H]([C@@]3([C@@]4(C5(Cl)Cl)Cl)Cl)Cl)Cl)[C@@H]6[C@H]2O6	0
236	1,2,3,4-Diepoxybutane DL	C1C(O1)C2CO2	0
237	Chlorpyrifos (Dursban)	CCOP(=S)(OCC)OC1=NC(=C(C=C1Cl)Cl)Cl	0
238	Diethylacetamide	CCN(CC)C(=O)C	1
239	Diethylacetylurea	CCC(CC)C(=O)NC(=O)N	0
240	Diethylene glycol	C(COCCO)O	1
241	Diethylformamide	CCN(CC)C=O	0
242	Diethylmaleate	CCOC(=O)/C=C\C(=O)OCC	0
243	Diethylstilbestrol	CC/C(=C(/CC)\C1=CC=C(C=C1)O)/C2=CC=C(C=C2)O	1
244	N,N'-Diethylthiourea	CCN(CC)C(=S)N	1
245	2-(Difluoromethyl)-dl-ornithine	C(CC(C(F)F)(C(=O)O)N)CN	0
246	Diglycidyl resorcinol ether, technical grade	C1C(O1)COC2=CC(=CC=C2)OCC3CO3	1
247	5,6-Dihydro-5-azacytidine	C1N=C(NC(=O)N1[C@H]2[C@@H]([C@@H]([C@H](O2)CO)O)O)N	0
248	1,2-Dihydro-2-(5-nitro-2-thienyl) quinazolin-4(3H)-one	C1=CC=C2C(=C1)C(=O)NC(N2)C3=CC=C(S3)[N+](=O)[O-]	1
249	3,6-Dihydro-2-nitroso-2H-1,2-oxazine	C1C=CCON1N=O	1
250	3,4-Dihydrocoumarin	C1CC(=O)OC2=CC=CC=C21	1
251	Dihydrosafrole	CCCC1=CC2=C(C=C1)OCO2	1
252	Dimethadione	CC1(C(=O)NC(=O)O1)C	0
253	Dimethoate	CNC(=O)CSP(=S)(OC)OC	0
254	Dimethoxane	CC1CC(OC(O1)C)OC(=O)C	1
255	2,5-Dimethoxy-4'-aminostilbene	COC1=CC(=C(C=C1)OC)/C=C/C2=CC=C(C=C2)N	1
256	3,3'-Dimethoxybenzidine-4,4'-diisocyanate	COC1=C(C=CC(=C1)C2=CC(=C(C=C2)N=C=O)OC)N=C=O	1
257	5,7-Dimethoxycyclopentene[c]coumarin	COC1=CC2=C(C3=C(CCC3)C(=O)O2)C(=C1)OC	0
258	5,7-Dimethoxycyclopentenone[2,3-c]coumarin	COC1=CC2=C(C3=C(C(=O)CC3)C(=O)O2)C(=C1)OC	0
259	5,7-Dimethoxycyclopentenone[3,2-c] coumarin	COC1=CC2=C(C3=C(C(=O)CC3)C(=O)O2)C(OC)=C1	0
260	5,6-Dimethoxysterigmatocystin	COC1=C(C2=C(C(=C1)O)C(=O)C3=C(C=C4C(=C3O2)C5C=COC5O4)OC)OC	1
261	O,O-Dimethyl S-2(acetylamino)ethyl dithiophosphate, technical grade	CC(=O)NCCSP(=S)(OC)OC	0
262	4-Dimethylaminoazobenzene	CN(C)C1=CC=C(C=C1)N=NC2=CC=CC=C2	1
263	N,N'-Dimethyl-N,N'-dinitrosophthalamide	CN(C(=O)C1=CC=CC=C1C(=O)N(C)N=O)N=O	0
264	Dimethyl hydrogen phosphite	COP(=O)OC	1
265	Dimethyl morpholinophosphoramidate	COP(=O)(N1CCOCC1)OC	1
266	4,6-Dimethyl-2-(5-nitro-2-furyl) pyrimidine	CC1=CC(=NC(=N1)C2=CC=C(O2)[N+](=O)[O-])C	1
267	1,2-Dimethyl-5-nitroimidazole	CC1=NC=C(N1C)[N+](=O)[O-]	1
268	Dimethyl terephthalate	COC(=O)C1=CC=C(C=C1)C(=O)OC	0
269	N,N-Dimethylacetamide	CC(=O)N(C)C	0
270	trans-2-[(Dimethylamino)methylimino]-5-[2-(5-nitro-2-furyl)vinyl]-1,3,4-oxadiazole	CN(C)/C=N/C1=NN=C(O1)/C=C/C2=CC=C(O2)[N+](=O)[O-]	1
271	N,N-Dimethylaniline	CN(C)C1=CC=CC=C1	1
272	5,5-Dimethylbarbituric acid	CC1(C(=O)NC(=O)NC1=O)C	0
273	1-Dodecanamine, N,N-dimethyl-, N-oxide	CCCCCCCCCCCC[N+](C)(C)[O-]	0
274	Dimethylformamide	CN(C)C=O	0
275	Dimethyl hydrazine (DMH)	CN(C)N	0
276	2-(2,2-Dimethylhydrazino)-4-(5-nitro-2-furyl)thiazole	CN(C)NC1=NC(=CS1)C2=CC=C(O2)[N+](=O)[O-]	1
277	Dimethylnitramine	CN(C)[N+](=O)[O-]	1
278	Dimethylvinyl chloride (DMVC)	CC(=CCl)C	1
279	2,4-Dinitro-6-tert-butylphenylmethanesulfonate	CC(C)(C)C1=C(C(=CC(=C1)[N+](=O)[O-])[N+](=O)[O-])OS(=O)(=O)C	0
280	Dinitrosohomopiperazine	C1CN(CCN(C1)N=O)N=O	1
281	2,6-Dinitrotoluene	CC1=C(C=CC=C1[N+](=O)[O-])[N+](=O)[O-]	1
282	1,4-Dioxane	C1COCCO1	1
283	Dioxathion	CCOP(=S)(OCC)SC1C(OCCO1)SP(=S)(OCC)OCC	0
284	Dipentylnitrosamine	CCCCCN(CCCCC)N=O	1
285	N,N'-Diphenyl-p-phenylenediamine	C1=CC=C(C=C1)N(C2=CC=CC=C2)C3=CC=C(C=C3)N	0
286	5,5-Diphenylhydantoin (phenytoin)	C1=CC=C(C=C1)C2(C(=O)NC(=O)N2)C3=CC=CC=C3	0
287	2,5-Dithiobiurea	C(=S)(N)NNC(=S)N	0
288	Dithiooxamide	C(=S)(C(=S)N)N	0
289	3-O-Dodecylcarbomethylascorbic acid	CCCCCCCCCCCCC(=O)COC1=C(C(=O)O[C@@H]1[C@H](CO)O)O	0
290	dl-Dopa	C1=CC(=C(C=C1CC(C(=O)O)N)O)O	0
291	Doxefazepam	C1=CC=C(C(=C1)C2=NC(C(=O)N(C3=C2C=C(C=C3)Cl)CCO)O)F	0
292	Ellagic acid	C1=C2C3=C(C(=C1O)O)OC(=O)C4=CC(=C(C(=C43)OC2=O)O)O	0
293	Endrin	C1[C@@H]2[C@@H]3[C@H]([C@H]1[C@H]4[C@@H]2O4)[C@@]5(C(=C([C@]3(C5(Cl)Cl)Cl)Cl)Cl)Cl	0
294	Epichlorhydrin	C1C(O1)CCl	1
295	1,2-Epoxybutane	CCC1CO1	1
296	Estazolam	C1C2=NN=CN2C3=C(C=C(C=C3)Cl)C(=N1)C4=CC=CC=C4	0
297	Estradiol mustard	C[C@]12CC[C@H]3[C@H]([C@@H]1CC[C@@H]2OC(=O)CC4=CC=C(C=C4)N(CCCl)CCCl)CCC5=C3C=CC(=C5)OC(=O)CC6=CC=C(C=C6)N(CCCl)CCCl	0
298	Ethinyl estradiol	C[C@]12CC[C@H]3[C@H]([C@@H]1CC[C@]2(C#C)O)CCC4=C3C=CC(=C4)O	1
299	Ethionine (DL-ethionine)	CCSCCC(C(=O)O)N	1
300	Dulcin	CCOC1=CC=C(C=C1)NC(=O)N	1
301	Ethoxyquin	CCOC1=CC2=C(C=C1)NC(C=C2C)(C)C	0
302	Ethyl acrylate	CCOC(=O)C=C	1
303	Ethanol	CCO	1
304	Z-Ethyl-O,N,N-azoxyethane	CCN=[N+](CC)[O-]	1
305	Z-Ethyl-O,N,N-azoxymethane	CC[N+](=NC)[O-]	1
306	S-Ethyl-l-cysteine	CCSC[C@@H](C(=O)O)N	0
307	Di(p-ethylphenyl)dichloroethane	CCC1=CC=C(C=C1)C(C2=CC=C(C=C2)CC)C(Cl)Cl	0
308	Ethyl-3-methyl-3-phenylglycidate	CCOC(=O)C1C(O1)(C)C2=CC=CC=C2	0
309	3-O-Ethylascorbic acid	CCOC1=C(C(=O)O[C@@H]1[C@H](CO)O)O	0
310	Ethylbenzene	CCC1=CC=CC=C1	1
311	Ethylene oxide	C1CO1	1
312	Ethylene thiourea (ETU)	C1CNC(=S)N1	1
313	4-Vinyl-1-cyclohexene diepoxide	C1CC2C(O2)CC1C3CO3	0
314	2-Ethylhexanol	CCCCC(CC)CO	0
315	Di(2-ethylhexyl)adipate	CCCCC(CC)COC(=O)CCCCC(=O)OCC(CC)CCCC	0
316	Di(2-ethylhexyl) phthalate	CCCCC(CC)COC(=O)C1=CC=CC=C1C(=O)OCC(CC)CCCC	1
317	1-Ethylnitroso-3-(2-hydroxyethyl)-urea	CCN(C(=O)NCCO)N=O	1
318	1-Ethylnitroso-3-(2-oxopropyl)-urea	CCN(C(=O)NCC(=O)C)N=O	1
319	Ethylnitrosocyanamide	CCN(C#N)N=O	1
320	Ethylphenylacetylurea	CCC(C1=CC=CC=C1)C(=O)NC(=O)N	0
321	Ethynodiol diacetate	CC(=O)O[C@H]1CC[C@@H]2[C@H]3CC[C@]4([C@H]([C@@H]3CCC2=C1)CC[C@]4(C#C)OC(=O)C)C	0
322	Etodolac	CCC1=C2C(=CC=C1)C3=C(N2)C(OCC3)(CC)CC(=O)O	0
323	Eugenol	COC1=C(C=CC(=C1)CC=C)O	0
324	Fenthion	CC1=C(C=CC(=C1)OP(=S)(OC)OC)SC	0
325	Fenvalerate	CC(C)C(C1=CC=C(C=C1)Cl)C(=O)OC(C#N)C2=CC(=CC=C2)OC3=CC=CC=C3	0
326	Fluconazole	C1=CC(=C(C=C1F)F)C(CN2C=NC=N2)(CN3C=NC=N3)O	1
327	Fluometuron	CN(C)C(=O)NC1=CC=CC(=C1)C(F)(F)F	0
328	N-(2-Fluorenyl)-2,2,2-trifluoroacetamide	C1C2=CC=CC=C2C3=C1C=C(C=C3)NC(=O)C(F)(F)F	1
329	N-4-(4'-Fluorobiphenyl)acetamide	CC(=O)NC1=CC=C(C=C1)C2=CC=C(C=C2)F	1
330	2-Fluoroethyl-nitrosourea	C(CF)N(C(=O)N)N=O	1
331	5-Fluorouracil	C1=C(C(=O)NC(=O)N1)F	0
332	Fluvastatin	CC(C)N1C2=CC=CC=C2C(=C1/C=C/[C@@H](C[C@@H](CC(=O)O)O)O)C3=CC=C(C=C3)F	1
333	Formaldehyde	C=O	1
334	Formic acid 2-[4-(2-furyl)-2-thiazolyl]hydrazide	C1=COC(=C1)C2=CSC(=N2)NNC=O	0
335	Formic acid 2-(4-methyl-2-thiazolyl)hydrazide	CC1=CSC(=N1)NNC=O	1
336	Formic acid 2-[4-(5-nitro-2-furyl)-2-thiazolyl]hydrazide	C1=C(OC(=C1)[N+](=O)[O-])C2=CSC(=N2)NNC=O	1
337	1-Formyl-3-thiosemicarbazide	C(=O)NNC(=S)N	0
338	Fumonisin b1	CCCC[C@@H](C)[C@H]([C@H](C[C@@H](C)C[C@@H](CCCC[C@H](C[C@@H]([C@H](C)N)O)O)O)OC(=O)C[C@@H](CC(=O)O)C(=O)O)OC(=O)C[C@@H](CC(=O)O)C(=O)O	1
339	2-Furaldehyde semicarbazone	C1=COC(=C1)/C=N/NC(=O)N	0
340	Furan	C1=COC=C1	1
341	Furfural	C1=COC(=C1)C=O	1
342	Furosemide	C1=COC(=C1)CNC2=CC(=C(C=C2C(=O)O)S(=O)(=O)N)Cl	0
343	Fusarenon-X	CC1=C[C@@H]2[C@]([C@@H](C1=O)O)([C@]3([C@@H]([C@H]([C@H]([C@@]34CO4)O2)O)OC(=O)C)C)CO	0
344	Gallic acid	C1=C(C=C(C(=C1O)O)O)C(=O)O	0
345	Gemcadiol	CC(C)(CCCCCCC(C)(C)CO)CO	0
346	Gemfibrozil	CC1=CC(=C(C=C1)C)OCCCC(C)(C)C(=O)O	0
347	Glu-P-1	CC1=CC=CN2C1=NC3=C2N=C(C=C3)N	1
348	Glu-P-2	C1=CC2=NC3=C(N2C=C1)N=C(C=C3)N	1
349	3-Chloro-1,2-propanediol	C(C(CCl)O)O	0
350	Glycidaldehyde	C1C(O1)C=O	0
351	Glycidol	C1C(O1)CO	1
352	Glycine	C(C(=O)O)N	1
353	Glycyrrhetinic acid	C[C@]12CC[C@](C[C@H]1C3=CC(=O)[C@@H]4[C@]5(CC[C@@H](C([C@@H]5CC[C@]4([C@@]3(CC2)C)C)(C)C)O)C)(C)C(=O)O	0
354	Hematoxylin	C1C2=CC(=C(C=C2[C@H]3[C@@]1(COC4=C3C=CC(=C4O)O)O)O)O	1
355	Heptachlor	C1=CC(C2C1C3(C(=C(C2(C3(Cl)Cl)Cl)Cl)Cl)Cl)Cl	0
356	Heptamethyleneimine	C1CCCNCCC1	0
357	Heptylamine	CCCCCCCN	0
358	Hexachlorobenzene	C1(=C(C(=C(C(=C1Cl)Cl)Cl)Cl)Cl)Cl	1
359	Hexachloro-1,3-butadiene	C(=C(Cl)Cl)(C(=C(Cl)Cl)Cl)Cl	1
360	alpha-1,2,3,4,5,6-Hexachlorocyclohexane	C1(C(C(C(C(C1Cl)Cl)Cl)Cl)Cl)Cl	1
361	Hexachlorocyclopentadiene	C1(=C(C(C(=C1Cl)Cl)(Cl)Cl)Cl)Cl	0
362	Hexachloroethane	C(C(Cl)(Cl)Cl)(Cl)(Cl)Cl	1
363	Hexachlorophene	C1=C(C(=C(C(=C1Cl)Cl)CC2=C(C(=CC(=C2Cl)Cl)Cl)O)O)Cl	0
364	Urotropine	C1N2CN3CN1CN(C2)C3	0
365	Hexamethylmelamine	CN(C)C1=NC(=NC(=N1)N(C)C)N(C)C	1
366	Hexamethylphosphoramide	CN(C)P(=O)(N(C)C)N(C)C	1
367	Hexanamide	CCCCCC(=O)N	0
368	1-O-Hexyl-2,3,5-trimethylhydroquinone	CCCCCCOC1=C(C(=C(C(=C1)C)O)C)C	0
369	N-Hexylnitrosourea	CCCCCCN(C(=O)N)N=O	1
370	4-Hexylresorcinol	CCCCCCC1=C(C=C(C=C1)O)O	0
371	2-Hydrazino-4-(p-aminophenyl) thiazole	C1=CC(=CC=C1C2=CSC(=N2)NN)N	1
372	2-Hydrazino-4-(5-nitro-2-furyl)thiazole	C1=C(OC(=C1)[N+](=O)[O-])C2=CSC(=N2)NN	1
373	2-Hydrazino-4-(p-nitrophenyl) thiazole	C1=CC(=CC=C1C2=CSC(=N2)NN)[N+](=O)[O-]	1
374	2-Hydrazino-4-phenylthiazole	C1=CC=C(C=C1)C2=CSC(=N2)NN	0
375	Hydrazobenzene	C1=CC=C(C=C1)NNC2=CC=CC=C2	1
376	Ethane, 2,2-dichloro-1,1,1-trifluoro-	C(C(F)(F)F)(Cl)Cl	1
377	Hydrochlorothiazide	C1NC2=CC(=C(C=C2S(=O)(=O)N1)S(=O)(=O)N)Cl	0
378	Hydrocortisone	C[C@]12CCC(=O)C=C1CC[C@@H]3[C@@H]2[C@H](C[C@]4([C@H]3CC[C@@]4(C(=O)CO)O)C)O	0
379	3-Hydroxy-4-acetylaminobiphenyl	CC(=O)NC1=C(C=C(C=C1)C2=CC=CC=C2)O	0
380	N-Hydroxy-2-acetylaminofluorene	CC(=O)N(C1=CC2=C(C=C1)C3=CC=CC=C3C2)O	1
381	3-Hydroxy-4-aminobiphenyl	C1=CC=C(C=C1)C2=CC(=C(C=C2)N)O	0
382	1-Hydroxyanthraquinone	C1=CC=C2C(=C1)C(=O)C3=C(C2=O)C(=CC=C3)O	1
383	1-(2-Hydroxyethyl)-3-[(5-nitrofurfurylidene)amino]-2-imidazolidinone	C1CN(C(=O)N1CCO)/N=C/C2=CC=C(O2)[N+](=O)[O-]	1
384	1-(2-Hydroxyethyl)-nitroso-3-ethylurea	CCNC(=O)N(CCO)N=O	1
385	1-(2-Hydroxyethyl)-1-nitrosourea	C(CO)N(C(=O)N)N=O	1
386	4-(2-Hydroxyethylamino)-2-(5-nitro-2-thienyl)quinazoline	C1=CC=C2C(=C1)C(=NC(=N2)C3=CC=C(S3)[N+](=O)[O-])NCCO	1
387	1-(3-Hydroxypropyl)-1-nitrosourea	C(CN(C(=O)N)N=O)CO	1
388	8-Hydroxyquinoline	C1=CC2=C(C(=C1)O)N=CC=C2	0
389	1'-Hydroxysafrole	C=CC(C1=CC2=C(C=C1)OCO2)O	1
390	Ibuprofen	CC(C)CC1=CC=C(C=C1)C(C)C(=O)O	0
391	ICRF-159	CC(CN1CC(=O)NC(=O)C1)N2CC(=O)NC(=O)C2	1
392	3-((Imino((2,2,2-trifluoroethyl)amino)methyl)amino)1H-pyrazole-1-pentamide	C1=CN(N=C1NC(=NCC(F)(F)F)N)CCCCC(=O)N	1
393	Indolidan	CC1(C2=C(C=CC(=C2)C3=NNC(=O)CC3)NC1=O)C	1
394	Indomethacin	CC1=C(C2=C(N1C(=O)C3=CC=C(C=C3)Cl)C=CC(=C2)OC)CC(=O)O	1
395	Iodoacetamide	C(C(=O)N)I	0
396	Iodoform	C(I)(I)I	0
397	IQ	CN1C2=C(C3=C(C=C2)N=CC=C3)N=C1N	1
398	Isatidine	C/C=C\1/C[C@H]([C@@](C(=O)OCC2=CC[N@@+]3([C@H]2[C@@H](CC3)OC1=O)[O-])(CO)O)C	1
399	Isobutene	CC(=C)C	1
400	Isobutyl nitrite	CC(C)CON=O	1
401	N-Isobutyl-N'-nitro-N-nitrosoguanidine	CC(C)CN(C(=N)N[N+](=O)[O-])N=O	0
402	Isomazole	COC1=C(C=CC(=C1)S(=O)C)C2=NC3=C(N2)C=NC=C3	1
403	Isoniazid	C1=CN=CC=C1C(=O)NN	1
404	Isophorone	CC1=CC(=O)CC(C1)(C)C	1
405	Isophosphamide	C1CN(P(=O)(OC1)NCCCl)CCCl	1
406	Isopropanol	CC(C)O	0
407	Isopropyl-N-(3-chlorophenyl) carbamate	CC(C)OC(=O)NC1=CC(=CC=C1)Cl	0
408	Kaempferol	C1=CC(=CC=C1C2=C(C(=O)C3=C(C=C(C=C3O2)O)O)O)O	0
409	Chlordecone (kepone)	C1(=O)C2(C3(C4(C1(C5(C2(C3(C(C45Cl)(Cl)Cl)Cl)Cl)Cl)Cl)Cl)Cl)Cl	1
410	Ketoprofen	CC(C1=CC(=CC=C1)C(=O)C2=CC=CC=C2)C(=O)O	0
411	Lasiocarpine	C/C=C(/C)\C(=O)O[C@H]1CCN2[C@@H]1C(=CC2)COC(=O)[C@@]([C@H](C)OC)(C(C)(C)O)O	1
412	D-Limonene	CC1=CC[C@@H](CC1)C(=C)C	1
413	Lithocholic acid	C[C@H](CCC(=O)O)[C@H]1CC[C@@H]2[C@@]1(CC[C@H]3[C@H]2CC[C@H]4[C@@]3(CC[C@H](C4)O)C)C	0
414	Lonidamine	C1=CC=C2C(=C1)C(=NN2CC3=C(C=C(C=C3)Cl)Cl)C(=O)O	0
415	Lornoxicam	CN1C(=C(C2=C(S1(=O)=O)C=C(S2)Cl)O)C(=O)NC3=CC=CC=N3	0
416	Lovastatin	CC[C@H](C)C(=O)O[C@H]1C[C@H](C=C2[C@H]1[C@H]([C@H](C=C2)C)CC[C@@H]3C[C@H](CC(=O)O3)O)C	0
417	Loxtidine	CN1C(=NC(=N1)CO)NCCCOC2=CC=CC(=C2)CN3CCCCC3	1
418	Malaoxon	CCOC(=O)CC(C(=O)OCC)SP(=O)(OC)OC	0
419	Malathion	CCOC(=O)CC(C(=O)OCC)SP(=S)(OC)OC	0
420	Maleic hydrazide	C1=CC(=O)NNC1=O	0
421	D-Mannitol	C([C@H]([C@H]([C@@H]([C@@H](CO)O)O)O)O)O	0
422	Mannitol nitrogen mustard	C(CCl)NC[C@H]([C@H]([C@@H]([C@@H](CNCCCl)O)O)O)O	0
423	MeIQx	CC1=CN=C2C=CC3=C(C2=N1)N=C(N3C)N	1
424	Melamine	C1(=NC(=NC(=N1)N)N)N	1
425	Meloxicam	CC1=CN=C(S1)NC(=O)C2=C(C3=CC=CC=C3S(=O)(=O)N2C)O	0
426	Melphalan	C1=CC(=CC=C1C[C@@H](C(=O)O)N)N(CCCl)CCCl	1
427	dl-Menthol	CC1CCC(C(C1)O)C(C)C	0
428	MER-25	CCN(CC)CCOC1=CC=C(C=C1)C(CC2=CC=C(C=C2)OC)(C3=CC=CC=C3)O	0
429	2-Mercaptobenzothiazole	C1=CC=C2C(=C1)NC(=S)S2	1
430	6-Mercaptopurine	C1=NC2=C(N1)C(=S)N=CN2	0
431	Metepa	CC1CN1P(=O)(N2CC2C)N3CC3C	1
432	Methafurylene	CN(C)CCN(CC1=CC=CO1)C2=CC=CC=N2	0
433	Methaphenilene	CN(C)CCN(CC1=CC=CS1)C2=CC=CC=C2	0
434	Methimazole	CN1C=CNC1=S	1
435	dl-Methionine	CSCCC(C(=O)O)N	0
436	Methotrexate	CN(CC1=CN=C2C(=N1)C(=NC(=N2)N)N)C3=CC=C(C=C3)C(=O)N[C@@H](CCC(=O)O)C(=O)O	0
437	2-Methoxy-3-aminodibenzofuran	COC1=C(C=C2C(=C1)C3=CC=CC=C3O2)N	1
438	3-Methoxycatechol	COC1=CC=CC(=C1O)O	1
439	Methoxychlor	COC1=CC=C(C=C1)C(C2=CC=C(C=C2)OC)C(Cl)(Cl)Cl	0
440	Hydroquinone monomethyl ether	COC1=CC=C(C=C1)O	1
441	8-Methoxypsoralen	COC1=C2C(=CC3=C1OC=C3)C=CC(=O)O2	1
442	Methyl bromide	CBr	0
443	Methyl-t-butyl ether	CC(C)(C)OC	1
444	Methyl carbamate	COC(=O)N	1
445	Methyl carbazate	COC(=O)NN	0
446	Methyl clofenapate	CC(C)(C(=O)OC)OC1=CC=C(C=C1)C2=CC=C(C=C2)Cl	1
447	3'-Methyl-4-dimethylaminoazobenzene	CC1=CC(=CC=C1)N=NC2=CC=C(C=C2)N(C)C	1
448	N-Methyl-N,4-dinitrosoaniline	CN(C1=CC=C(C=C1)N=O)N=O	1
449	Methyl linoleate hydroperoxide	CCCCCC(/C=C/C=C\CCCCCCCC(=O)OC)OO	0
450	Methyl linoleate, native	CCCCC/C=C\C/C=C\CCCCCCCC(=O)OC	0
451	Methyl methacrylate	CC(=C)C(=O)OC	0
452	1-Methyl-3-nitro-1-nitroso-guanidine	CN(C(=N)N[N+](=O)[O-])N=O	1
453	2-Methyl-1-nitroanthraquinone	CC1=C(C2=C(C=C1)C(=O)C3=CC=CC=C3C2=O)[N+](=O)[O-]	1
454	4-Methyl-1-[(5-nitrofurfurylidene)amino]-2-imidazolidinone	CC1CN(C(=O)N1)/N=C/C2=CC=C(O2)[N+](=O)[O-]	1
455	N-Methyl-N-nitrosobenzamide	CN(C(=O)C1=CC=CC=C1)N=O	1
456	N-(N-Methyl-N-nitrosocarbamoyl)-l-ornithine	CN(C(=O)NCCC[C@@H](C(=O)O)N)N=O	1
457	R(-)-2-Methyl-N-nitrosopiperidine (S(+)-2-Methyl-N-nitrosopiperidine)	C[C@@H]1CCCCN1N=O	1
458	Methyl parathion	COP(=S)(OC)OC1=CC=C(C=C1)[N+](=O)[O-]	0
459	N-Methyl-2-pyrrolidone	CN1CCCC1=O	0
460	alpha-Methylbenzyl alcohol	CC(C1=CC=CC=C1)O	1
461	p-Methylcatechol	CC1=CC(=C(C=C1)O)O	1
462	3-Methylcholanthrene	CC1=C2CCC3=C2C(=CC4=C3C=CC5=CC=CC=C54)C=C1	1
463	4,4'-Methylenebis(2-chloroaniline)	C1=CC(=C(C=C1CC2=CC(=C(C=C2)N[C@H]3[C@@H]([C@H]([C@@H]([C@H](O3)C(=O)O)O)O)O)Cl)Cl)N	1
464	4,4'-Methylene-bis(2-methylaniline)	CC1=C(C=CC(=C1)CC2=CC(=C(C=C2)N)C)N	1
465	Methylene chloride	C(Cl)Cl	1
466	4,4'-Methylenebis(N,N-dimethyl)benzenamine	CN(C)C1=CC=C(C=C1)CC2=CC=C(C=C2)N(C)C	1
467	Phenol, 2,2'-methylenebis[6-(1,1-dimethylethyl)-4-methyl-	CC1=CC(=C(C(=C1)C(C)(C)C)O)CC2=C(C(=CC(=C2)C)C(C)(C)C)OP(OC3=C(C=C(C=C3C(C)(C)C)C)CC4=C(C(=CC(=C4)C)C(C)(C)C)O)OC5=C(C=C(C=C5C(C)(C)C)C)CC6=C(C(=CC(=C6)C)C(C)(C)C)O	0
468	Methylguanidine	CN=C(N)N	0
469	7-Methylguanine	CN1C=NC2=C1C(=O)NC(=N2)N	0
470	Methylhydroquinone	CC1=C(C=CC(=C1)O)O	0
471	Methylnitramine	CN[N+](=O)[O-]	1
472	4-(Methylnitrosamino)-1-(3-pyridyl)-1-butanol	CN(CCCC(C1=CN=CC=C1)O)N=O	1
473	4-(N-Nitroso-N-methylamino)-1-(3-pyridyl)-1-butanone	CN(CCCC(=O)C1=CN=CC=C1)N=O	1
474	Methylnitrosocyanamide	CN(C#N)N=O	1
475	N-Methylolacrylamide	C=CC(=O)NCO	0
476	6-Methylquinoline	CC1=CC2=C(C=C1)N=CC=C2	0
477	8-Methylquinoline	CC1=C2C(=CC=C1)C=CC=N2	0
478	Metiapine	CC1=CC2=C(C=C1)SC3=CC=CC=C3N=C2N4CCN(CC4)C	0
479	Metronidazole	CC1=NC=C(N1CCO)[N+](=O)[O-]	1
480	Mexacarbate	CC1=CC(=CC(=C1N(C)C)C)OC(=O)NC	0
481	Michler's ketone	CN(C)C1=CC=C(C=C1)C(=O)C2=CC=C(C=C2)N(C)C	1
482	Mirex	C12(C3(C4(C5(C3(C(C1(C5(C2(C4(Cl)Cl)Cl)Cl)Cl)(Cl)Cl)Cl)Cl)Cl)Cl)Cl	1
483	Mirex, photo-	C12C3(C4(C5(C3(C(C1(C5(C2(C4(Cl)Cl)Cl)Cl)Cl)(Cl)Cl)Cl)Cl)Cl)Cl	1
484	Misoprostol	CCCCC(C)(C/C=C/[C@H]1[C@@H](CC(=O)[C@@H]1CCCCCCC(=O)OC)O)O	0
485	Mitomycin C	CC1=C(C(=O)C2=C(C1=O)N3C[C@H]4[C@@H]([C@@]3([C@@H]2COC(=O)N)OC)N4)N	1
486	Monochloroacetic acid	C(C(=O)O)Cl	0
487	Monocrotaline	C[C@H]1C(=O)O[C@@H]2CCN3[C@@H]2C(=CC3)COC(=O)[C@]([C@]1(C)O)(C)O	1
488	4-Morpholino-2-(5-nitro-2-thienyl)quinazoline	C1COCCN1C2=NC(=NC3=CC=CC=C32)C4=CC=C(S4)[N+](=O)[O-]	1
489	Myleran	CS(=O)(=O)OCCCCOS(=O)(=O)C	0
490	Nafenopin	CC(C)(C(=O)O)OC1=CC=C(C=C1)C2CCCC3=CC=CC=C23	1
491	Nalidixic acid	CCN1C=C(C(=O)C2=C1N=C(C=C2)C)C(=O)O	1
492	1,5-Naphthalenediamine	C1=CC2=C(C=CC=C2N)C(=C1)N	1
493	2-Naphthylamine	C1=CC=C2C=C(C=CC2=C1)N	1
494	Nefiracetam	CC1=C(C(=CC=C1)C)NC(=O)CN2CCCC2=O	0
495	Nicotine	CN1CCC[C@H]1C2=CN=CC=C2	0
496	Nithiazide	CCNC(=O)NC1=NC=C(S1)[N+](=O)[O-]	1
497	Nitrilotriacetic acid (NTA)	C(C(=O)O)N(CC(=O)O)CC(=O)O	1
498	3-Nitro-p-acetophenetide	CCOC1=C(C=C(C=C1)NC(=O)C)[N+](=O)[O-]	0
499	5-Nitro-o-anisidine	COC1=C(C=C(C=C1)[N+](=O)[O-])N	1
500	Nitrofurazone	C1=C(OC(=C1)[N+](=O)[O-])/C=N/NC(=O)N	1
501	5-Nitro-2-furamidoxime	C1=C(OC(=C1)[N+](=O)[O-])/C(=N/O)/N	0
502	5-Nitro-2-furanmethanediol diacetate	CC(=O)OC(C1=CC=C(O1)[N+](=O)[O-])OC(=O)C	0
503	3-(5-Nitro-2-furyl)-imidazo(1,2-alpha) pyridine	C1=CC2=NC=C(N2C=C1)C3=CC=C(O3)[N+](=O)[O-]	1
504	5-(5-Nitro-2-furyl)-1,3,4-oxadiazole-2-ol	C1=C(OC(=C1)[N+](=O)[O-])C2=NNC(=O)O2	1
505	N-{[3-(5-Nitro-2-furyl)-1,2,4-oxadiazole-5-yl]-methyl}acetamide	CC(=O)NCC1=NC(=NO1)C2=CC=C(O2)[N+](=O)[O-]	1
506	N-[5-(5-Nitro-2-furyl)-1,3,4-thiadiazol-2-yl]acetamide	CC(=O)NC1=NN=C(S1)C2=CC=C(O2)[N+](=O)[O-]	1
507	4-(5-Nitro-2-furyl)thiazole	C1=C(OC(=C1)[N+](=O)[O-])C2=CSC=N2	1
508	N-[4-(5-Nitro-2-furyl)-2-thiazolyl]acetamide	CC(=O)NC1=NC(=CS1)C2=CC=C(O2)[N+](=O)[O-]	1
509	N-(4-(5-Nitro-2-furyl)-2-thiazolyl)formamide	C1=C(OC(=C1)[N+](=O)[O-])C2=CSC(=N2)NC=O	1
510	N,N'-[6-(5-Nitro-2-furyl)-S-triazine-2,4-diyl]bisacetamide	CC(=O)NC1=NC(=NC(=N1)C2=CC=C(O2)[N+](=O)[O-])NC(=O)C	1
511	3-Nitro-3-hexene	CCC=C(CC)[N+](=O)[O-]	1
512	2-Nitro-p-phenylenediamine	C1=CC(=C(C=C1N)[N+](=O)[O-])N	0
513	4-Nitro-o-phenylenediamine	C1=CC(=C(C=C1[N+](=O)[O-])N)N	0
514	5-Nitro-o-toluidine	CC1=C(C=C(C=C1)[N+](=O)[O-])N	0
515	5-Nitroacenaphthene	C1CC2=CC=C(C3=CC=CC1=C23)[N+](=O)[O-]	1
516	p-Nitroaniline	C1=CC(=CC=C1N)[N+](=O)[O-]	0
517	o-Nitroanisole	COC1=CC=CC=C1[N+](=O)[O-]	1
518	4-Nitroanthranilic acid	C1=CC(=C(C=C1[N+](=O)[O-])N)C(=O)O	0
519	Nitrobenzene	C1=CC=C(C=C1)[N+](=O)[O-]	1
520	6-Nitrobenzimidazole	C1=CC2=C(C=C1[N+](=O)[O-])NC=N2	0
521	p-Nitrobenzoic acid	C1=CC(=CC=C1C(=O)O)[N+](=O)[O-]	1
522	1-Nitrobutane	CCCC[N+](=O)[O-]	0
523	2-Nitrobutane	CCC(C)[N+](=O)[O-]	1
524	Nitroethane	CC[N+](=O)[O-]	0
525	Nitrofen	C1=CC(=CC=C1[N+](=O)[O-])OC2=C(C=C(C=C2)Cl)Cl	1
526	2-Nitrofluorene	C1C2=CC=CC=C2C3=C1C=C(C=C3)[N+](=O)[O-]	1
527	Nitrofurantoin	C1C(=O)NC(=O)N1/N=C/C2=CC=C(O2)[N+](=O)[O-]	1
528	1-[(5-Nitrofurfurylidene)amino]-2-imidazolidinone	C1CN(C(=O)N1)/N=C/C2=CC=C(O2)[N+](=O)[O-]	1
529	Nitrogen mustard	CN(CCCl)CCCl	1
530	Nitromethane	C[N+](=O)[O-]	1
531	1-Nitronaphthalene	C1=CC=C2C(=C1)C=CC=C2[N+](=O)[O-]	0
532	3-Nitropentane	CCC(CC)[N+](=O)[O-]	1
533	1-Nitropropane	CCC[N+](=O)[O-]	0
534	2-Nitropropane	CC(C)[N+](=O)[O-]	0
535	3-Nitropropionic acid	C(C[N+](=O)[O-])C(=O)O	0
536	1-Nitropyrene	C1=CC2=C3C(=C1)C=CC4=C(C=CC(=C43)C=C2)[N+](=O)[O-]	1
537	6-Nitroquinoline	C1=CC2=C(C=CC(=C2)[N+](=O)[O-])N=C1	0
538	8-Nitroquinoline	C1=CC2=C(C(=C1)[N+](=O)[O-])N=CC=C2	1
539	Nitroso-Baygon	CC(C)OC1=CC=CC=C1OC(=O)N(C)N=O	1
540	N-Nitroso-bis-(4,4,4-trifluoro-N-butyl)amine	C(CC(F)(F)F)CN(CCCC(F)(F)F)N=O	1
541	1-Nitroso-5,6-dihydrothymine	CC1CN(C(=O)NC1=O)N=O	0
542	1-Nitroso-5,6-dihydrouracil	C1CN(C(=O)NC1=O)N=O	1
543	N-Nitroso-2,3-dihydroxypropyl-2-hydroxypropylamine	CC(CN(CC(CO)O)N=O)O	1
544	Nitroso-2,3-dihydroxypropyl-2-oxopropylamine	CC(=O)CN(CC(CO)O)N=O	1
545	N-Nitroso-2,3-dihydroxypropylethanolamine	C(CO)N(CC(CO)O)N=O	1
546	1-Nitroso-3,5-dimethyl-4-benzoylpiperazine	CC1CN(CC(N1C(=O)C2=CC=CC=C2)C)N=O	1
547	1-Nitroso-1-hydroxyethyl-3-chloroethylurea	C(CCl)NC(=O)N(CCO)N=O	1
548	N-Nitroso-2-hydroxymorpholine	C1COC(CN1N=O)O	0
549	1-Nitroso-1-(2-hydroxypropyl)-3-chloroethylurea	CC(CN(C(=O)NCCCl)N=O)O	1
550	N-Nitroso-(2-hydroxypropyl)-(2-hydroxyethyl)amine	CC(CN(CCO)N=O)O	1
551	N-Nitroso-3-hydroxypyrrolidine	C1CN(CC1O)N=O	1
552	N-Nitroso-N-isobutylurea	CC(C)CN(C(=O)N)N=O	1
553	N-Nitroso-N-methyl-N-dodecylamine	CCCCCCCCCCCCN(C)N=O	1
554	N-Nitroso-N-methyl-4-fluoroaniline	CN(C1=CC=C(C=C1)F)N=O	1
555	N-Nitroso-N-methyl-4-nitroaniline	CN(C1=CC=C(C=C1)[N+](=O)[O-])N=O	0
556	Nitroso-N-methyl-N-(2-phenyl)ethylamine	CN(CCC1=CC=CC=C1)N=O	1
557	N-Nitroso-N-methyl-N-tetradecylamine	CCCCCCCCCCCCCCN(C)N=O	1
558	N-Nitroso-N-methyldecylamine	CCCCCCCCCCN(C)N=O	1
559	N-Nitroso-N-methylurea	CN(C(=O)N)N=O	1
560	3-Nitroso-2-oxazolidinone	C1COC(=O)N1N=O	1
561	Nitroso-2-oxopropylethanolamine	CC(=O)CN(CCO)N=O	1
562	di(N-Nitroso)-perhydropyrimidine	C1CN(CN(C1)N=O)N=O	1
563	Nitroso-1,2,3,6-tetrahydropyridine	C1CN(CC=C1)N=O	1
564	N-Nitroso(2,2,2-trifluoroethyl) ethylamine	CCN(CC(F)(F)F)N=O	1
565	1-Nitroso-3,4,5-trimethylpiperazine	C[C@@H]1CN(C[C@@H](N1C)C)N=O	1
566	N-Nitrosoallyl-2,3-dihydroxypropylamine	C=CCN(CC(CO)O)N=O	1
567	N-Nitrosoallyl-2-hydroxypropylamine	CC(CN(CC=C)N=O)O	1
568	N-Nitrosoallyl-2-oxopropylamine	CC(=O)CN(CC=C)N=O	1
569	N-Nitrosoallylethanolamine	C=CCN(CCO)N=O	1
570	Nitrosoamylurethane	CCCCCN(C(=O)OCC)N=O	1
571	Nitrosoanabasine	C1CCN(C(C1)C2=CN=CC=C2)N=O	1
572	N-Nitrosobenzthiazuron	CN(C(=O)NC1=NC2=CC=CC=C2S1)N=O	1
573	N-Nitrosobis(2-hydroxypropyl)amine	CC(CN(CC(C)O)N=O)O	1
574	N-Nitrosobis(2-oxopropyl)amine	CC(=O)CN(CC(=O)C)N=O	1
575	N-Nitrosobis(2,2,2-trifluoroethyl) amine	C(C(F)(F)F)N(CC(F)(F)F)N=O	0
576	N-Nitrosocimetidine	CC1=C(N=CN1)CSCCN=C(NC#N)N(C)N=O	0
577	Nitrosodibutylamine	CCCCN(CCCC)N=O	1
578	N-Nitrosodiethanolamine	C(CO)N(CCO)N=O	1
579	N-Nitrosodiethylamine	CCN(CC)N=O	1
580	N-Nitrosodimethylamine	CN(C)N=O	1
581	N-Nitrosodiphenylamine	C1=CC=C(C=C1)N(C2=CC=CC=C2)N=O	1
582	p-Nitrosodiphenylamine	C1=CC=C(C=C1)NC2=CC=C(C=C2)N=O	1
583	N-Nitrosodipropylamine	CCCN(CCC)N=O	1
584	N-Nitrosodithiazine	C1N(CSCS1)N=O	0
585	Nitrosododecamethyleneimine	C1CCCCCCN(CCCCC1)N=O	1
586	N-Nitrosoephedrine	CC(C(C1=CC=CC=C1)O)N(C)N=O	1
587	Nitrosoethylmethylamine	CCN(C)N=O	1
588	Nitrosoethylurethane	CCN(C(=O)OCC)N=O	1
589	N-Nitrosoguvacoline	COC(=O)C1=CCCN(C1)N=O	0
590	Nitrosoheptamethyleneimine	C1CCCN(CCC1)N=O	1
591	1-Nitrosohydantoin	C1C(=O)NC(=O)N1N=O	1
592	Nitrosohydroxyproline	C1[C@H](CN([C@@H]1C(=O)O)N=O)O	0
593	Nitrosoiminodiacetic acid	C(C(=O)O)N(CC(=O)O)N=O	0
594	N-Nitrosomethyl-2,3-dihydroxypropylamine	CN(CC(CO)O)N=O	1
595	N-Nitrosomethyl-(2-hydroxyethyl) amine	CN(CCO)N=O	1
596	N-Nitrosomethyl-(3-hydroxypropyl) amine	CN(CCCO)N=O	1
597	N-Nitrosomethyl(2-oxopropyl)amine	CC(=O)CN(C)N=O	1
598	2-Nitrosomethylaminopyridine	CN(C1=CC=CC=N1)N=O	1
599	3-Nitrosomethylaminopyridine	CN(C1=CN=CC=C1)N=O	0
600	4-Nitrosomethylaminopyridine	CN(C1=CC=NC=C1)N=O	0
601	Nitrosomethylaniline	CN(C1=CC=CC=C1)N=O	1
602	Nitrosomethylundecylamine	CCCCCCCCCCCN(C)N=O	1
603	N-Nitrosomorpholine	C1COCCN1N=O	1
604	N'-Nitrosonornicotine-1-N-oxide	C1CC(N(C1)N=O)C2=C[N+](=CC=C2)[O-]	1
605	Nitrosopipecolic acid	C1CCN(C(C1)C(=O)O)N=O	0
606	N-Nitrosopiperazine	C1CN(CCN1)N=O	1
607	N-Nitrosopiperidine	C1CCN(CC1)N=O	1
608	Nitrosoproline	C1C[C@H](N(C1)N=O)C(=O)O	0
609	N-Nitrosopyrrolidine	C1CCN(C1)N=O	1
610	N-Nitrosothialdine	CC1N(C(SC(S1)C)C)N=O	1
611	N-Nitrosothiomorpholine	C1CSCCN1N=O	1
612	o-Nitrosotoluene	CC1=CC=CC=C1N=O	1
613	Norharman	C1=CC=C2C(=C1)C3=C(N2)C=NC=C3	0
614	Ochratoxin A	C[C@@H]1CC2=C(C=C(C(=C2C(=O)O1)O)C(=O)N[C@@H](CC3=CC=CC=C3)C(=O)O)Cl	1
615	Octachlorostyrene	C1(=C(C(=C(C(=C1Cl)Cl)Cl)Cl)Cl)C(=C(Cl)Cl)Cl	0
616	Oltipraz	CC1=C(SSC1=S)C2=NC=CN=C2	0
617	Omeprazole	CC1=CN=C(C(=C1OC)C)CS(=O)C2=NC3=C(N2)C=C(C=C3)OC	1
618	Oxamyl	CNC(=O)ON=C(C(=O)N(C)C)SC	0
619	Oxazepam	C1=CC=C(C=C1)C2=NC(C(=O)NC3=C2C=C(C=C3)Cl)O	0
620	N-(9-Oxo-2-fluorenyl)acetamide	CC(=O)NC1=CC2=C(C=C1)C3=CC=CC=C3C2=O	1
621	Oxolinic acid	CCN1C=C(C(=O)C2=CC3=C(C=C21)OCO3)C(=O)O	1
622	1-(2-Oxopropyl)nitroso-3-(2-chloroethyl)urea	CC(=O)CN(C(=O)NCCCl)N=O	0
623	2-Oxopropylnitrosourea	CC(=O)CN(C(=O)N)N=O	0
624	1'-Oxosafrole	C=CC(=O)C1=CC2=C(C=C1)OCO2	0
625	4,4'-Oxydianiline	C1=CC(=CC=C1N)OC2=CC=C(C=C2)N	1
626	Morpholine, 4-[(4-morpholinylthio)thioxomethyl]-	C1COCCN1C(=S)SN2CCOCC2	1
627	Parathion	CCOP(=S)(OCC)OC1=CC=C(C=C1)[N+](=O)[O-]	0
628	Patulin	C1C=C2C(=CC(=O)O2)C(O1)O	0
629	Pentachloroanisole	COC1=C(C(=C(C(=C1Cl)Cl)Cl)Cl)Cl	1
630	Pentachloroethane	C(C(Cl)(Cl)Cl)(Cl)Cl	0
631	N-Pentyl-N'-nitro-N-nitrosoguanidine	CCCCCN(C(=N)N[N+](=O)[O-])N=O	0
632	Petasitenine	C[C@@H]1C[C@@]2([C@H](O2)C)C(=O)O[C@@H]3CCN(C/C=C(\C3=O)/COC(=O)[C@]1(C)O)C	1
633	Phenacetin	CCOC1=CC=C(C=C1)NC(=O)C	1
634	Phenazone	CC1=CC(=O)N(N1C)C2=CC=CC=C2	1
635	Phenesterin	C[C@H](CCCC(C)C)[C@H]1CC[C@@H]2[C@@]1(CC[C@H]3[C@H]2CC=C4[C@@]3(CC[C@@H](C4)OC(=O)CC5=CC=C(C=C5)N(CCCl)CCCl)C)C	1
636	Phenethyl isothiocyanate	C1=CC=C(C=C1)CCN=C=S	0
637	Phenobarbital	CCC1(C(=O)NC(=O)NC1=O)C2=CC=CC=C2	0
638	Phenol	C1=CC=C(C=C1)O	0
639	Phenolphthalein	C1=CC=C2C(=C1)C(=O)OC2(C3=CC=C(C=C3)O)C4=CC=C(C=C4)O	1
640	1-Phenyl-3,3-dimethyltriazene	CN(C)N=NC1=CC=CC=C1	1
641	1-Phenyl-3-methyl-5-pyrazolone	CC1=NN(C(=O)C1)C2=CC=CC=C2	0
642	N-Phenyl-2-naphthylamine	C1=CC=C(C=C1)NC2=CC3=CC=CC=C3C=C2	0
643	(E)-7-Phenyl-7-(3-pyridyl)-6-heptenoic acid	C1=CC=C(C=C1)/C(=C\CCCCC(=O)O)/C2=CN=CC=C2	0
644	1-Phenyl-2-thiourea	C1=CC=C(C=C1)NC(=S)N	0
645	C.I Solvent yellow 14	C1=CC=C(C=C1)N=NC2=C(C=CC3=CC=CC=C32)O	1
646	Phenylbutazone	CCCCC1C(=O)N(N(C1=O)C2=CC=CC=C2)C3=CC=CC=C3	1
647	1,4-Benzenediamine	C1=CC(=CC=C1N)N	0
648	Phenylethyl-3-methylcaffeate	COC1=C(C=CC(=C1)/C=C/C(=O)OCCC2=CC=CC=C2)O	0
649	Phenyl glycidyl ether	C1C(O1)COC2=CC=CC=C2	1
650	o-Phenylphenol	C1=CC=C(C=C1)C2=CC=CC=C2O	1
651	Phthalamide	C1=CC=C(C(=C1)C(=O)N)C(=O)N	0
652	Phthalic anhydride	C1=CC=C2C(=C1)C(=O)OC2=O	0
653	Picloram, technical grade	C1(=C(C(=NC(=C1Cl)Cl)C(=O)O)Cl)N	0
654	Pilocarpine	CC[C@H]1[C@H](COC1=O)CC2=CN=CN2C	0
655	Pimaricin	C[C@@H]1C/C=C/C=C/C=C/C=C/[C@@H](C[C@H]2[C@@H]([C@H](C[C@](O2)(C[C@H](C[C@@H]3[C@H](O3)/C=C/C(=O)O1)O)O)O)C(=O)O)O[C@H]4[C@H]([C@H]([C@@H]([C@H](O4)C)O)N)O	0
656	Piperazine	C1CNCCN1	0
657	Piperidine	C1CCNCC1	0
658	Piperonyl butoxide	CCCCOCCOCCOCC1=CC2=C(C=C1CCC)OCO2	1
659	Piperonyl sulfoxide	CCCCCCCCS(=O)C(C)CC1=CC2=C(C=C1)OCO2	0
660	Piroxicam	CN1C(=C(C2=CC=CC=C2S1(=O)=O)O)C(=O)NC3=CC=CC=N3	0
661	Pivalolactone	CC1(COC1=O)C	1
662	Practolol	CC(C)NCC(COC1=CC=C(C=C1)NC(=O)C)O	0
663	Prazepam	C1CC1CN2C(=O)CN=C(C3=C2C=CC(=C3)Cl)C4=CC=CC=C4	0
664	Praziquantel	C1CCC(CC1)C(=O)N2CC3C4=CC=CC=C4CCN3C(=O)C2	0
665	Prednimustine	C[C@]12C[C@@H]([C@H]3[C@H]([C@@H]1CC[C@@]2(C(=O)COC(=O)CCCC4=CC=C(C=C4)N(CCCl)CCCl)O)CCC5=CC(=O)C=C[C@]35C)O	1
666	Prednisolone	C[C@]12C[C@@H]([C@H]3[C@H]([C@@H]1CC[C@@]2(C(=O)CO)O)CCC4=CC(=O)C=C[C@]34C)O	1
667	Probenecid	CCCN(CCC)S(=O)(=O)C1=CC=C(C=C1)C(=O)O	0
668	Procarbazine	CC(C)NC(=O)C1=CC=C(C=C1)CNNC	1
669	Propane sultone	C1COS(=O)(=O)C1	1
670	Propiolactone	C1COC1=O	1
671	Propyl gallate	CCCOC(=O)C1=CC(=C(C(=C1)O)O)O	0
672	N-Propyl-N'-nitro-N-nitrosoguanidine	CCCN(/C(=N/[N+](=O)[O-])/N)N=O	1
673	N-Propyl-N-nitrosourea	CCCN(C(=O)N)N=O	1
674	Propylene	CC=C	0
675	1,2-Propylene glycol	CC(CO)O	0
676	1,2-Propylene oxide	CC1CO1	1
677	6-Propyl-2-thiouracil	CCCC1=CC(=O)NC(=S)N1	1
678	Proresid	CCNNC(=O)[C@H]1[C@@H]([C@H](C2=CC3=C(C=C2[C@H]1C4=CC(=C(C(=C4)OC)OC)OC)OCO3)O)CO	0
679	Protocatechuic acid	C1=CC(=C(C=C1C(=O)O)O)O	0
680	Purpurin	C1=CC=C2C(=C1)C(=O)C3=C(C2=O)C(=C(C=C3O)O)O	1
681	Pyrazinamide	C1=CN=C(C=N1)C(=O)N	0
682	Pyrimethamine	CCC1=C(C(=NC(=N1)N)N)C2=CC=C(C=C2)Cl	0
683	p-Benzoquinone dioxime	C1=CC(=CC=C1NO)N=O	1
684	C.I. Pigment red 3	CC1=CC(=C(C=C1)N=NC2=C(C=CC3=CC=CC=C32)O)[N+](=O)[O-]	1
685	C.I. Pigment red 23	COC1=C(C=C(C=C1)[N+](=O)[O-])N=NC2=C(C(=CC3=CC=CC=C32)C(=O)NC4=CC(=CC=C4)[N+](=O)[O-])O	0
686	HC red 3	C1=CC(=C(C=C1N)[N+](=O)[O-])NCCO	0
687	Reserpine	CO[C@H]1[C@@H](C[C@@H]2CN3CCC4=C([C@H]3C[C@@H]2[C@@H]1C(=O)OC)NC5=C4C=CC(=C5)OC)OC(=O)C6=CC(=C(C(=C6)OC)OC)OC	1
688	Resorcinol	C1=CC(=CC(=C1)O)O	0
689	trans-Retinoic acid	CC1=C(C(CCC1)(C)C)/C=C/C(=C/C=C/C(=C/C(=O)O)/C)/C	0
690	Retinol acetate	CC1=C(C(CCC1)(C)C)/C=C/C(=C/C=C/C(=C/COC(=O)C)/C)/C	1
691	All-trans-retinyl palmitate	CCCCCCCCCCCCCCCC(=O)OC/C=C(\C)/C=C/C=C(\C)/C=C/C1=C(CCCC1(C)C)C	0
692	Retrorsine	C/C=C\1/C[C@H]([C@@](C(=O)OCC2=CCN3[C@H]2[C@@H](CC3)OC1=O)(CO)O)C	1
693	Rifampicin	C[C@H]1/C=C/C=C(\C(=O)NC2=C(C(=C3C(=C2O)C(=C(C4=C3C(=O)[C@](O4)(O/C=C/[C@@H]([C@H]([C@H]([C@@H]([C@@H]([C@@H]([C@H]1O)C)O)C)OC(=O)C)C)OC)C)C)O)O)/C=N/N5CCN(CC5)C)/C	0
694	Ripazepam	CCN1C2=C(C(=N1)C)NC(=O)CN=C2C3=CC=CC=C3	0
695	Rotenone	CC(=C)[C@H]1CC2=C(O1)C=CC3=C2O[C@@H]4COC5=CC(=C(C=C5[C@@H]4C3=O)OC)OC	0
696	Saccharin	C1=CC=C2C(=C1)C(=O)NS2(=O)=O	0
697	Safrole	C=CCC1=CC2=C(C=C1)OCO2	1
698	Salbutamol	CC(C)(C)NCC(C1=CC(=C(C=C1)O)CO)O	1
699	Salicylazosulfapyridine	C1=CC=NC(=C1)NS(=O)(=O)C2=CC=C(C=C2)N=NC3=CC(=C(C=C3)O)C(=O)O	1
700	Secalciferol (24R,25-Dihydroxyvitamin D3)	C[C@H](CC[C@H](C(C)(C)O)O)[C@H]1CC[C@@H]\2[C@@]1(CCC/C2=C\C=C/3\C[C@H](CCC3=C)O)C	0
701	Senkirkine	C/C=C\1/C[C@H]([C@@](C(=O)OC/C/2=C/CN(CC[C@H](C2=O)OC1=O)C)(C)O)C	1
702	Sesamol	C1OC2=C(O1)C=C(C=C2)O	1
703	Sorbic acid	C/C=C/C=C/C(=O)O	0
704	Sterigmatocystin	COC1=C2C(=C3[C@@H]4C=CO[C@@H]4OC3=C1)OC5=CC=CC(=C5C2=O)O	1
705	Stevioside	C[C@@]12CCC[C@@]([C@H]1CC[C@]34[C@H]2CC[C@](C3)(C(=C)C4)O[C@H]5[C@@H]([C@H]([C@@H]([C@H](O5)CO)O)O)O[C@H]6[C@@H]([C@H]([C@@H]([C@H](O6)CO)O)O)O)(C)C(=O)O[C@H]7[C@@H]([C@H]([C@@H]([C@H](O7)CO)O)O)O	0
706	Streptozotocin	CN(C(=O)N[C@@H]1[C@H]([C@@H]([C@H](O[C@@H]1O)CO)O)O)N=O	1
707	Styrene oxide	C1C(O1)C2=CC=CC=C2	1
708	Succinic anhydride	C1CC(=O)OC1=O	0
709	Sulfallate	CCN(CC)C(=S)SCC(=C)Cl	1
710	Sulfisoxazole	CC1=C(ON=C1C)NS(=O)(=O)C2=CC=C(C=C2)N	0
711	3-Sulfolene	C1C=CCS1(=O)=O	0
712	4,4'-Sulfonylbisacetanilide	CC(=O)NC1=CC=C(C=C1)S(=O)(=O)C2=CC=C(C=C2)NC(=O)C	1
713	Suxibuzone	CCCCC1(C(=O)N(N(C1=O)C2=CC=CC=C2)C3=CC=CC=C3)COC(=O)CCC(=O)O	0
714	Symphytine	C/C=C(\C)/C(=O)O[C@@H]1CCN2[C@@H]1C(=CC2)COC(=O)[C@@]([C@H](C)O)(C(C)C)O	1
715	Chlorotrianisene	COC1=CC=C(C=C1)C(=C(C2=CC=C(C=C2)OC)Cl)C3=CC=C(C=C3)OC	0
716	L-Taurine	C(CS(=O)(=O)O)N	0
717	Tegafur	C1CC(OC1)N2C=C(C(=O)NC2=O)F	0
718	Terbutaline	CC(C)(C)NCC(C1=CC(=CC(=C1)O)O)O	1
719	Phenol, 2,4,6-tris(1,1-dimethylethyl)-	CC(C)(C)C1=CC(=C(C(=C1)C(C)(C)C)O)C(C)(C)C	0
720	2,3,5,6-Tetrachloro-4-nitroanisole	COC1=C(C(=C(C(=C1Cl)Cl)[N+](=O)[O-])Cl)Cl	0
721	2,2',5,5'-Tetrachlorobenzidine	C1=C(C(=CC(=C1Cl)N)Cl)C2=CC(=C(C=C2Cl)N)Cl	0
722	2,3,7,8-Tetrachlorodibenzo-p-dioxin	C1=C2C(=CC(=C1Cl)Cl)OC3=CC(=C(C=C3O2)Cl)Cl	1
723	1,1,1,2-Tetrachloroethane	C(C(Cl)(Cl)Cl)Cl	0
724	1,1,2,2-Tetrachloroethane	C(C(Cl)Cl)(Cl)Cl	0
725	Tetrachloroethylene	C(=C(Cl)Cl)(Cl)Cl	1
726	Tetraethylthiuram disulfide	CCN(CC)C(=S)SSC(=S)N(CC)CC	0
727	Ethane, 1,1,1,2-tetrafluoro-	C(C(F)(F)F)F	1
728	Tetrafluoroethylene	C(=C(F)F)(F)F	1
729	Tetrahydro-2-nitroso-2H-1,2-oxazine	C1CCON(C1)N=O	1
730	1-trans-delta-9-Tetrahydrocannabinol	CCCCCC1=CC(=C2[C@@H]3C=C(CC[C@H]3C(OC2=C1)(C)C)C)O	0
731	Tetrahydrofuran	C1CCOC1	1
732	3,4,5,6-Tetrahydrouridine	C1CN(C(=O)NC1O)[C@H]2[C@@H]([C@@H]([C@H](O2)CO)O)O	0
733	Tetramethylthiouram disulfide	CN(C)C(=S)SSC(=S)N(C)C	0
734	Tetranitromethane	C([N+](=O)[O-])([N+](=O)[O-])([N+](=O)[O-])[N+](=O)[O-]	1
735	Thenyldiamine	CN(C)CCN(CC1=CSC=C1)C2=CC=CC=N2	0
736	Theophylline	CN1C2=C(C(=O)N(C1=O)C)NC=N2	0
737	Thiabendazole	C1=CC=C2C(=C1)NC(=N2)C3=CSC=N3	0
738	Thiamphenicol	CS(=O)(=O)C1=CC=C(C=C1)[C@H]([C@@H](CO)NC(=O)C(Cl)Cl)O	0
739	Tris(aziridinyl)-phosphine sulfide (thio-tepa)	C1CN1P(=S)(N2CC2)N3CC3	1
740	Thioacetamide	CC(=S)N	1
741	4,4-Thiobis(6-tert-butyl-m-cresol)	CC1=CC(=C(C=C1SC2=CC(=C(C=C2C)O)C(C)(C)C)C(C)(C)C)O	0
742	4,4'-Thiodianiline	C1=CC(=CC=C1N)SC2=CC=C(C=C2)N	1
743	beta-Thioguanidine deoxyriboside	C1[C@@H]([C@H](O[C@H]1N2C=NC3=C2NC(=NC3=S)N)CO)O	1
744	Thiosemicarbazide	C(=S)(N)NN	0
745	Thiouracil	C1=CNC(=S)NC1=O	1
746	Thiourea	C(=S)(N)N	1
747	dl-alpha-Tocopherol	CC1=C(C2=C(CCC(O2)(C)CCCC(C)CCCC(C)CCCC(C)C)C(=C1O)C)C	0
748	dl-alpha-Tocopheryl acetate	CC1=C(C(=C(C2=C1O[C@](CC2)(C)CCC[C@H](C)CCC[C@H](C)CCCC(C)C)C)OC(=O)C)C	0
749	Tolazamide	CC1=CC=C(C=C1)S(=O)(=O)NC(=O)NN2CCCCCC2	0
750	Tolbutamide	CCCCNC(=O)NS(=O)(=O)C1=CC=C(C=C1)C	0
751	o-Toluenesulfonamide	CC1=CC=CC=C1S(=O)(=O)N	1
752	p-Tolylurea	CC1=CC=C(C=C1)NC(=O)N	0
753	Trenimon	C1CN1C2=CC(=O)C(=C(C2=O)N3CC3)N4CC4	1
754	Triamcinolone acetonide	C[C@]12C[C@@H]([C@]3([C@H]([C@@H]1C[C@@H]4[C@]2(OC(O4)(C)C)C(=O)CO)CCC5=CC(=O)C=C[C@@]53C)F)O	1
755	Triamterene	C1=CC=C(C=C1)C2=NC3=C(N=C(N=C3N=C2N)N)N	0
756	Tribromomethane	C(Br)(Br)Br	1
757	Tricaprylin	CCCCCCCC(=O)OCC(COC(=O)CCCCCCC)OC(=O)CCCCCCC	1
758	1,1,2-Trichloro-1,2,2-trifluoroethane, technical grade	C(C(F)(Cl)Cl)(F)(F)Cl	0
759	Trichloroacetic acid	C(=O)(C(Cl)(Cl)Cl)O	0
760	2,4,6-Trichloroaniline	C1=C(C=C(C(=C1Cl)N)Cl)Cl	0
761	1,1,2-Trichloroethane	C(C(Cl)Cl)Cl	0
762	1,1,1-Trichloroethane, technical grade	CC(Cl)(Cl)Cl	0
763	Trichloroethylene	C(=C(Cl)Cl)Cl	0
764	Trichlorofluoromethane	C(F)(Cl)(Cl)Cl	0
765	N-(Trichloromethylthio)phthalimide	C1=CC=C2C(=C1)C(=O)N(C2=O)SC(Cl)(Cl)Cl	0
766	2,4,6-Trichlorophenol	C1=C(C=C(C(=C1Cl)O)Cl)Cl	1
767	2,4,5-Trichlorophenoxyacetic acid	C1=C(C(=CC(=C1Cl)Cl)Cl)OCC(=O)O	0
768	Trichlorfon	COP(=O)(C(C(Cl)(Cl)Cl)O)OC	0
769	1,2,3-Trichloropropane	C(C(CCl)Cl)Cl	1
770	Triethanolamine	C(CO)N(CCO)CCO	0
771	Triethylene glycol	C(COCCOCCO)O	0
772	2,2,2-Trifluoro-N-[4-(5-nitro-2-furyl)-2-thiazolyl]acetamide	C1=C(OC(=C1)[N+](=O)[O-])C2=CSC(=N2)NC(=O)C(F)(F)F	1
773	Trifluralin, technical grade	CCCN(CCC)C1=C(C=C(C=C1[N+](=O)[O-])C(F)(F)F)[N+](=O)[O-]	0
774	Trimethadione	CC1(C(=O)N(C(=O)O1)C)C	0
775	(+-)-7-(3,5,6-trimethyl-1,4-benzoquinon-2-yl)-7-phenylheptanoic acid	CC1=C(C(=O)C(=C(C1=O)C)C(CCCCCC(=O)O)C2=CC=CC=C2)C	0
776	2,4,5-Trimethylaniline	CC1=CC(=C(C=C1C)N)C	1
777	Benzene, 1,2,4-trimethyl-	CC1=CC(=C(C=C1)C)C	1
778	Trimethylthiourea	CNC(=S)N(C)C	1
779	1,3,5-Trinitrobenzene	C1=C(C=C(C=C1[N+](=O)[O-])[N+](=O)[O-])[N+](=O)[O-]	0
780	1,2,3-Propanetriol, trinitrate	C(C(CO[N+](=O)[O-])O[N+](=O)[O-])O[N+](=O)[O-]	1
781	Tris(2,3-dibromopropyl) phosphate	C(C(CBr)Br)OP(=O)(OCC(CBr)Br)OCC(CBr)Br	1
782	Tris(2-ethylhexyl)phosphate	CCCCC(CC)COP(=O)(OCC(CC)CCCC)OCC(CC)CCCC	0
783	Triisopropanolamine	CC(CN(CC(C)O)CC(C)O)O	0
784	dl-Tryptophan	C1=CC=C2C(=C1)C(=CN2)CC(C(=O)O)N	0
785	L-Tryptophan	C1=CC=C2C(=C1)C(=CN2)C[C@@H](C(=O)O)N	0
786	Turmeric (>98% curcurmin)	COC1=C(O)C=CC(\C=C\C(=O)CC(=O)\C=C\C2=CC(OC)=C(O)C=C2)=C1	0
787	Uracil	C1=CNC(=O)NC1=O	1
788	Urapidil	CN1C(=CC(=O)N(C1=O)C)NCCCN2CCN(CC2)C3=CC=CC=C3OC	0
789	Urea	C(=O)(N)N	0
790	Urethane	CCOC(=O)N	1
791	Vinblastine	CC[C@@]1(C[C@H]2C[C@@](C3=C(CCN(C2)C1)C4=CC=CC=C4N3)(C5=C(C=C6C(=C5)[C@]78CCN9[C@H]7[C@@](C=CC9)([C@H]([C@@]([C@@H]8N6C)(C(=O)OC)O)OC(=O)C)CC)OC)C(=O)OC)O	0
792	Vinyl acetate	CC(=O)OC=C	1
793	Vinyl bromide	C=CBr	1
794	Ethene, chloro-	C=CCl	1
795	Ethene, fluoro-	C=CF	1
796	Vinylidene fluoride	C=C(F)F	0
797	2-Pyrrolidinone, 1-ethenyl-	C=CN1CCCC1=O	1
798	Voglibose	C1[C@@H]([C@@H]([C@H]([C@@H]([C@]1(CO)O)O)O)O)NC(CO)CO	0
799	C.I. Disperse yellow 3	CC1=CC(=C(C=C1)O)N=NC2=CC=C(C=C2)NC(=O)C	1
800	Diarylanilide yellow	CC(=O)C(C(=O)NC1=CC=CC=C1)N=NC2=C(C=C(C=C2)C3=CC(=C(C=C3)N=NC(C(=O)C)C(=O)NC4=CC=CC=C4)Cl)Cl	0
801	C.I. pigment yellow 16	CC1=C(C=CC(=C1)C2=CC(=C(C=C2)NC(=O)C(C(=O)C)N=NC3=C(C=C(C=C3)Cl)Cl)C)NC(=O)C(C(=O)C)N=NC4=C(C=C(C=C4)Cl)Cl	0
802	Butanamide, 2,2'-[(3,3'-dichloro[1,1'-biphenyl]-4,4'-diyl)bis(azo)]bis[N-(4-chloro-2,5-dimethoxyphenyl)-3-oxo-	CC(=O)C(C(=O)NC1=CC(=C(C=C1OC)Cl)OC)N=NC2=C(C=C(C=C2)C3=CC(=C(C=C3)N=NC(C(=O)C)C(=O)NC4=CC(=C(C=C4OC)Cl)OC)Cl)Cl	0
803	C.I Vat yellow 4	C1=CC=C2C(=C1)C3=C4C(=CC=C5C4=C(C=C3)C(=O)C6=CC=CC=C65)C2=O	0
804	HC yellow 4	C1=CC(=C(C=C1[N+](=O)[O-])OCCO)NCCO	0
805	Zearalenone	C[C@H]1CCCC(=O)CCC/C=C/C2=C(C(=CC(=C2)O)O)C(=O)O1	0

## Sheet: TRAIN_TEST
No.	DBI	S3K	MAXDP	piPC08	Yindex	IC3	J_D	SpMax_L	J_D/Dt	Chi_Dz(Z)	EE_B(m)	SpMax_B(v)	SpMax_B(s)	SpMAD_B(s)	ATSC0m	GATS6e	P_VSA_LogP_4	P_VSA_LogP_6	P_VSA_MR_5	P_VSA_v_3	P_VSA_e_2	P_VSA_s_6	SpMax_AEA(dm)	SdssC	CATS2D_01_AA	B01(C-N)	B01(N-N)	B03(C-Cl)	B04(C-N)	MLOGP	MDEN-23	MACCSFP102	MACCSFP163	Response	Set
1	1	1.67532	1.80556	0	0	1.32598	1.63299	3	2	1.15639	3.19503	2.78569	7.4396	2.51529	1.88039	0	48.3402	0	8.8252	20.2494	20.2494	25.1449	2.85894	0	0	0	0	0	0	-0.317449	0	0	0	1	TEST
2	1.41421	3.55348	1.44444	0	3.1324	2.6416	1.97474	3.41421	3	0.99338	3.45534	2.89937	6.4133	1.92513	2.48212	0	20.8185	0	22.0727	17.8726	17.8726	56.0531	3.62016	0	1	1	0	0	0	-0.386238	0	1	0	0	TRAIN
3	1.73205	3.01436	2.22222	0	0	2.06717	2.32379	4	3	1.02865	3.53403	3.07688	7.4412	2.24923	2.48212	0	29.8496	0	41.7224	13.5299	13.5299	58.0421	3.44992	-0.333333	0	1	0	0	0	-0.792238	0	0	0	1	TRAIN
4	3.937	4.72902	5.10855	4.84271	0.732993	4.38602	1.76985	5.39087	11.5085	0.337243	5.59707	3.85973	7.71709	2.1518	14.7172	1.53352	99.7363	4.27582	55.9136	79.3559	79.3559	94.6028	4.68914	-0.852321	0	1	0	0	1	1.25468	0	1	1	0	TRAIN
5	3.16228	3.22195	3.49772	6.29653	0.780564	4.11058	1.72467	4.84883	10.496	0.441406	5.38412	3.79991	7.81538	1.93363	10.4083	1.0739	49.2016	6.80722	48.8816	92.0127	92.0127	93.7028	3.78211	0.875358	2	1	1	0	1	2.33383	0.431527	1	0	1	TRAIN
6	1	1.49351	1.31944	0	0	0.930827	1.63299	3	2	1.25691	3.35789	3.05286	6.82419	2.21613	1.43391	0	16.6017	0	39.8846	25.427	25.427	31.0594	3.99726	0	0	1	0	0	0	-0.317449	0	0	0	0	TRAIN
7	2	3.63636	1.73148	0	3.91556	2.12581	2.53954	4.17009	4	0.884763	3.69824	3.16571	6.41255	1.83753	3.09695	0	2.75675	0	30.8979	20.4072	20.4072	56.0531	3.73649	0.685185	1	1	0	0	0	0.133089	0	1	0	1	TRAIN
8	3.08221	2.3841	3.89418	5.54883	0.99335	4.42325	1.88174	4.97088	12.1623	0.437049	4.99378	3.72037	7.43465	1.83175	7.17382	0.936306	32.3363	23.5422	15.4754	90.0111	90.0111	73.9115	3.70377	-0.344846	0	0	0	0	0	1.77909	0	0	1	1	TRAIN
9	2.34521	2.78743	3.85696	6.12386	0.831163	3.8404	1.71377	4.87321	10.4363	0.406886	5.00724	3.73807	7.43049	1.79852	6.55575	0.89287	29.8496	0	26.836	107.944	107.944	25.1449	3.53268	-0.0486471	0	1	0	0	1	3.10778	0	0	1	1	TEST
10	2.54951	1.669	4.17481	6.85135	0.931024	4.3899	1.7102	5.09325	17.061	0.46565	5.09423	3.89277	7.43049	1.78835	6.70534	1.49273	29.8496	0	29.3705	97.8972	97.8972	25.1449	3.55775	-0.0191147	0	1	0	0	1	3.36392	0	0	1	0	TRAIN
11	2.54951	1.76838	4.02047	6.87865	0.824855	4.48173	1.61162	5.03677	16.2095	0.443044	5.09391	3.88271	7.43049	1.78144	6.70534	0.786863	29.8496	0	29.3705	97.8972	97.8972	25.1449	3.53581	-0.0273508	0	1	0	0	1	3.36392	0	0	1	1	TRAIN
12	2.54951	1.669	4.21389	6.82969	0.968078	4.3899	1.74092	5.1445	17.233	0.477851	5.09425	3.89717	7.43049	1.78055	6.70534	1.10361	29.8496	0	29.3705	97.8972	97.8972	25.1449	3.55652	-0.0252027	0	1	0	0	1	3.36392	0	0	1	0	TRAIN
13	3	3.84275	3.67062	4.88753	1.11533	4.05366	2.17483	4.70928	10.4197	0.404026	4.86269	3.63621	7.47669	2.16406	6.40959	1.33253	98.5877	0	29.3705	60.8216	60.8216	92.9732	3.63503	-1.00624	0	1	0	0	1	1.33059	0	0	1	0	TRAIN
14	3.31662	4.15642	3.3091	0	2.58753	3.89241	3.60334	4.74722	9	0.487811	4.62973	3.31526	7.47717	2.31736	9.15829	1.57162	109.406	0	27.7356	53.903	53.903	131.537	3.82365	-1.4244	0	1	0	0	0	-0.349459	0	0	0	0	TEST
15	1.41421	4.07204	2.05556	0	3.1324	2.375	1.97474	3.41421	3	0.947031	3.55674	3.05293	7.43816	2.32681	2.07857	0	48.3402	0	0	36.6673	36.6673	40.9118	2.80787	0	0	0	0	0	0	0.0944188	0	0	0	0	TEST
16	2.82843	4.18437	1.59125	0	2.27245	3.15357	3.17534	4.4605	8	0.493279	4.17752	3.11815	4.66171	1.50129	5.5379	0.0733336	21.9998	11.7711	26.8352	52.4379	52.4379	37.7667	3.23475	0	0	0	0	0	0	1.32055	0	0	0	0	TRAIN
17	1.73205	3.37662	1.56444	0	2.34038	3.12193	2.19061	3.61803	4	0.814828	3.74537	3.09629	6.41325	1.89244	2.66715	0	20.8185	0	13.2475	34.2906	34.2906	71.8201	3.61416	0	1	1	0	0	0	0.0256297	0	1	0	0	TRAIN
18	2.91548	2.1904	6.07483	7.40874	0.809815	4.75139	1.65905	5.45418	22.9585	0.407959	5.43368	3.95034	7.42713	1.73003	10.1647	1.78942	30.2784	0	20.7747	133.954	133.954	47.1447	3.78943	-0.0170522	0	1	0	0	1	2.5708	0	0	1	1	TRAIN
19	2	3.37662	2.47222	0	3.91556	2.92193	2.53954	4.17009	4	0.85502	3.80239	3.23301	7.43977	2.15032	2.66715	0	29.8496	0	32.8972	29.9478	29.9478	73.809	3.38302	-0.481481	0	1	0	0	0	-0.38037	0	0	0	1	TRAIN
20	2	3.37662	2.25	0	3.91556	2.9477	2.53954	4.17009	4	0.879221	3.82538	3.22973	7.47907	2.41459	2.57674	0	68.7381	0	0	26.153	26.153	83.5952	3.46793	-0.981481	0	0	0	0	0	0.0256297	0	0	0	0	TRAIN
21	1.41421	5.499	1.50694	0	3.1324	2.12059	1.97474	3.41421	3	0.987165	3.67107	3.21573	6.82196	2.13428	1.59254	0	16.6017	0	31.0594	41.8449	41.8449	46.8263	3.98672	0	0	1	0	0	0	0.0944188	0	0	0	1	TEST
22	6.16441	14.7771	8.18304	7.63126	0.334537	5.64081	1.20481	5.38875	32.149	0.117586	6.6886	3.9345	7.45551	2.00235	45.2318	0.932731	404.204	0	264.935	275.063	275.063	409.566	3.99858	-12.7409	0	1	0	0	1	-1.30134	2.99563	0	1	1	TRAIN
23	3.16228	8.43215	3.15002	0	1.62514	2.91398	2.90947	4.27841	9	0.348361	4.40444	3.18645	7.43942	2.23387	5.80318	1.53802	59.6992	0	75.9325	19.5474	19.5474	116.084	3.52008	-0.658388	0	1	0	0	1	-0.377745	0	0	0	0	TRAIN
24	3.39116	2.75831	4.26132	6.26815	0.896718	4.46967	1.85543	4.96783	10.0575	0.414769	5.26751	3.76017	7.81539	2.1878	6.22425	1.33348	29.8496	22.6687	37.9172	82.9286	82.9286	127.804	3.78156	-0.645138	2	1	0	0	1	0.520783	0	1	0	1	TEST
25	2.54951	1.67129	5.36954	7.27932	0.752994	4.97283	1.49954	5.39065	22.6749	0.427458	5.39502	3.93909	7.43269	1.88328	9.23674	1.04815	43.3361	23.5422	5.06906	82.4622	82.4622	111.828	3.88397	0.679141	0	0	0	0	0	1.6891	0	0	1	1	TRAIN
26	2.54951	1.61078	5.30871	7.33204	0.752994	4.87914	1.49954	5.39065	22.6749	0.430629	5.42263	3.94749	7.4451	1.92704	8.41556	1.0259	73.6145	23.5422	5.06906	87.5957	87.5957	94.2894	3.91682	0.115644	0	0	0	0	0	1.8773	0	0	1	1	TRAIN
27	2.91548	3.83559	3.44937	4.97867	1.15509	4.46967	2.27294	4.87796	11.2973	0.407309	5.07283	3.70078	7.4766	1.99556	11.4144	0.983573	68.7381	0	7.12692	112.787	73.6383	133.744	3.63738	-0.883494	0	0	0	1	0	2.57293	0	0	1	0	TRAIN
28	3.74166	5.91109	3.53209	1.09861	1.85701	3.66123	3.42322	5.1749	11	0.449049	4.79275	3.36677	7.4343	1.6986	10.844	1.40517	45.9634	6.7625	55.061	81.2666	81.2666	55.7636	4.76182	-0.552636	1	1	0	0	1	0.787476	0	1	0	0	TEST
29	2.34521	1.89335	3.65546	1.94591	1.59134	3.85217	2.34202	4.76104	9.07551	0.529207	4.64646	3.43183	7.45014	2.36089	4.61106	1.1915	80.1394	20.3227	86.9294	13.2563	13.2563	108.332	3.8908	-2.12972	0	1	0	0	1	-2.34839	0	0	0	0	TRAIN
30	1.41421	3.48544	1.75694	0	3.1324	2.92193	1.97474	3.41421	3	0.824831	3.39121	2.92257	6.26974	2.11119	2.47773	0	0	0	0	25.2432	25.2432	58.4503	2.02864	0	0	0	0	0	0	0.201878	0	0	0	0	TRAIN
31	2.12132	3.36777	1.56366	0	1.13657	3.50326	1.74282	4.23321	5.3734	0.516719	4.18267	3.1723	4.59472	1.57844	4.60065	0.52601	21.9998	0	13.7772	39.0203	39.0203	37.7667	3.13883	0	0	0	0	0	0	0.169325	0	0	0	0	TRAIN
32	2	4.93831	0.586343	0	1.95797	3.0958	2.33909	3.73205	5	0.696358	4.34332	3.24355	5.14622	1.69976	6.32813	1.8832	13.9457	0	18.8912	86.4866	86.4866	77.7445	3.30099	0	0	1	0	0	0	2.03277	0	0	0	1	TRAIN
33	3.16228	6.37662	3.74236	0	1.93717	3.60539	3.16004	4.49437	9	0.410755	4.36537	3.22735	7.43098	1.83459	5.80569	0.620299	32.3363	0	24.7773	57.2118	57.2118	51.9117	3.69304	-0.143611	0	0	0	0	0	1.95261	0	0	0	1	TRAIN
34	3	2.69284	3.12708	0	2.65822	3.625	3.41009	4.70489	8	0.55666	4.40006	3.25402	7.53268	2.18259	4.45504	1.85414	50.5184	23.4369	38.0047	31.6247	31.6247	118.344	3.62456	-0.870463	2	1	1	0	1	-0.425295	1	1	0	1	TEST
35	2.12132	1.73166	5.50491	6.87517	1.07578	4.16198	1.91527	5.41601	19.7355	0.490759	7.65544	3.97887	7.43535	1.97657	68.7682	1.37322	60.5568	0	0	171.166	79.2574	83.187	3.83532	-0.401875	0	1	0	0	1	3.85222	0	0	1	1	TRAIN
36	2.73861	3.22199	3.75192	4.7143	1.2489	4.32486	2.30722	4.87713	10.8982	0.446272	4.81634	3.6825	7.43049	1.76115	7.02626	0.644815	29.8496	0	40.2535	66.1331	66.1331	69.042	3.53402	-0.117074	0	1	0	0	1	1.1405	0	0	1	0	TRAIN
37	2	1.38373	5.39435	6.79062	1.06222	4.11626	1.86952	5.3724	19.2112	0.481353	5.198	3.94645	7.43535	2.04015	6.52943	1.65589	60.5568	0	8.8252	94.6343	94.6343	83.187	3.80024	-0.29787	0	1	0	0	1	3.0916	0	0	1	1	TRAIN
38	2.23607	1.66565	3.27126	5.95519	1.02331	3.9477	1.83344	4.84532	9.60764	0.566049	5.06387	3.75085	7.81538	2.10178	3.75309	0.796739	38.346	5.44882	14.6312	39.0325	39.0325	135.985	3.78211	0	3	1	1	0	1	1.58207	0.365148	1	0	1	TEST
39	2.23607	1.81093	3.30527	5.95519	1.02331	3.9477	1.83344	4.84532	9.60764	0.603447	5.22625	3.78361	7.81537	2.09221	6.58128	1.15712	34.2556	5.44882	6.45031	62.1293	62.1293	126.477	3.78211	0	3	1	1	0	1	1.1124	0.365148	1	0	1	TRAIN
40	2.23607	1.83566	3.3201	5.95519	1.02331	4.0374	1.83344	4.84532	9.60764	0.56229	5.21417	3.78825	7.81537	2.09472	7.29341	1.20966	16.7855	17.2199	8.27749	71.6056	71.6056	109.937	3.78211	0	2	1	0	0	1	1.41276	0.2	1	0	1	TRAIN
41	2.12132	1.5909	3.13282	0	1.64763	3.85217	2.39563	4.89545	9.72361	0.643334	4.7509	3.72939	7.81492	2.37316	4.39893	1.681	42.6833	0	0	33.9422	33.9422	126.327	3.78102	0	2	1	0	0	1	1.33886	0	1	1	1	TRAIN
42	2.12132	1.5909	3.11808	0	1.64763	3.73452	2.39563	4.89545	9.72361	0.643503	4.7509	3.72932	7.81492	2.37302	4.39893	1.50948	42.6833	0	0	33.9422	33.9422	126.327	3.78137	0	2	1	0	0	1	1.33886	0	1	1	1	TRAIN
43	2.12132	1.5909	3.16398	3.44601	1.79006	3.85217	2.47051	4.96461	9.92946	0.663085	4.75087	3.73932	7.81502	2.35871	4.39893	3.23734	42.6833	0	0	33.9422	33.9422	126.327	3.80692	0	2	1	0	0	1	0.827858	0	1	1	1	TRAIN
44	2	1.35477	2.93468	0	1.87481	3.25163	2.30063	4.71411	7.99752	0.957885	4.86903	3.71043	7.81491	2.31965	5.60978	3.75729	28.5566	0	10.4777	41.7554	41.7554	100.43	3.78152	0	2	1	0	0	0	-0.163645	0.333333	1	0	1	TRAIN
45	1.87083	1.33295	5.19796	6.69827	1.0482	3.87314	1.82233	5.31795	18.6979	0.497192	5.14873	3.91871	7.43533	2.07584	5.68519	1.21576	60.5568	0	0	92.0997	92.0997	83.187	3.77947	-0.25213	0	1	0	0	1	2.32446	0	0	1	1	TEST
46	2.12132	2.77133	1.74782	6.03503	0.791846	4.32782	1.70525	4.84962	11.1223	0.409069	5.0657	3.72149	4.97231	1.61227	7.18904	1.08405	0	33.326	17.6504	98.6255	98.6255	66.2232	2.99818	0	1	1	1	0	1	3.214	0	0	1	1	TRAIN
47	2.82843	7.5974	2.9312	0	1.62239	3.91398	2.74669	4.23499	8	0.364136	4.20279	3.13947	7.47653	2.15852	5.57772	1.45938	68.7381	0	45.141	13.1537	13.1537	100.725	3.59566	-0.715721	0	1	0	0	1	-1.67746	0	0	0	0	TRAIN
48	2.82843	2.55728	3.57606	1.94591	1.69356	3.70247	2.47599	5.34648	9.6604	0.43207	4.51632	3.38418	7.47655	1.99096	7.0179	2.26813	68.7381	0	50.2101	18.2228	18.2228	100.725	3.68073	-0.706157	0	1	0	0	1	1.1495	0	0	1	1	TEST
49	0.707107	0.618663	1.04861	0	2.80336	3.12193	2.18411	4.30278	7.02555	1.19258	4.08029	3.42544	5.13247	1.61858	2.56782	0	45.2196	0	27.1807	10.5177	10.5177	66.3457	2.52141	0	0	1	1	0	0	-0.231308	0	0	0	1	TRAIN
50	3.60555	12.6918	3.19457	2.07944	1.19498	3.56028	2.85192	4.23606	13	0.224369	4.58377	3.14195	7.47653	1.87176	8.47637	0.852536	68.7381	0	57.8137	25.8264	25.8264	100.725	3.59565	-0.673198	0	1	0	0	1	-0.0786501	0	0	0	1	TRAIN
51	3.24037	2.5645	4.78788	3.13549	1.588	4.02086	2.74285	5.59461	12.5123	0.375625	4.91696	3.60152	7.46038	2.08605	8.72968	0.97891	84.8441	4.27582	70.1007	47.7643	47.7643	75.4348	4.31438	-1.65516	0	1	0	0	1	0.756663	0	0	1	0	TEST
52	3.31662	4.59088	3.37912	0	1.98655	3.97018	3.36134	4.70744	10	0.390754	4.49235	3.23388	7.53268	2.07966	6.40057	1.40544	50.5184	23.4369	54.4335	22.8103	22.8103	102.577	3.61987	-0.781386	2	1	1	0	1	0.458591	1	1	0	1	TRAIN
53	2	2.20562	1.52322	3.80388	1.30246	3.76227	2.13641	4.64854	9.2635	0.537138	4.55964	3.63823	4.71842	1.53847	5.23745	0.76647	0	0	8.8252	84.9947	84.9947	10.9999	2.85989	0	0	0	0	0	0	2.7229	0	0	1	0	TRAIN
54	1.87083	3.03128	1.84295	5.7441	0.939838	4.01137	1.82947	4.88317	11.3362	0.481832	5.4218	3.68179	5.24847	1.7499	15.5531	1.22977	50.3566	85.4823	25.1957	168.793	51.3473	167.803	3.21939	0	0	1	0	1	1	3.85658	0	0	1	0	TEST
55	0.707107	1.0171	1.35778	0	2.02243	2.89629	2.12292	4.41421	7.8978	0.881711	4.13255	3.53987	4.78728	1.70502	3.11429	0	0	0	0	50.138	50.138	32.8972	2.49885	0	0	1	0	0	1	1.50592	0	0	1	0	TRAIN
56	2	1.41652	3.34176	3.1689	1.86897	3.85217	2.39604	4.9225	9.3487	0.657143	4.55361	3.68584	7.47825	2.14791	4.28873	1.05279	68.7381	0	0	44.7572	44.7572	100.725	3.60208	-0.98787	0	1	0	0	1	1.64321	0	0	1	0	TRAIN
57	4.3589	7.38416	4.33118	4.55847	0.843385	4.27672	2.15677	5.31335	13.2656	0.288619	5.47425	3.68178	7.40635	1.71393	20.4325	0.627271	39.2473	0	47.3352	155.358	116.21	89.3958	4.62989	0	0	0	0	0	0	3.02991	0	1	1	1	TRAIN
58	2.44949	1.55212	3.53245	1.09861	1.79252	4.22193	2.57602	4.98349	9.89719	0.520487	4.68224	3.63227	7.43532	2.50515	5.95055	1.27553	117.703	0	0	7.19133	7.19133	206.878	3.8646	-2.77866	0	0	0	0	0	-2.32937	0	0	0	0	TRAIN
59	4.41588	5.93595	4.7923	4.81927	1.11464	4.73387	2.51474	4.90067	13.0762	0.276563	5.2278	3.57488	7.47708	2.16325	10.3217	1.00476	130.924	0	55.977	79.3248	79.3248	162.015	3.85854	-2.50575	0	1	0	0	1	-1.63379	0	0	1	0	TRAIN
60	2.82843	2.47367	3.61195	4.34299	1.5386	4.07066	2.46176	4.97184	10.9012	0.522918	4.82653	3.69189	7.47844	2.22274	5.43904	0.787628	101.074	0	8.8252	63.2604	63.2604	103.973	3.69738	-1.64764	0	0	0	0	0	1.7012	0	0	1	0	TRAIN
61	3.16228	5.62173	5.38004	7.18483	0.359277	5.21075	1.06681	5.03839	13.0307	0.206342	5.73934	3.89219	8.20091	1.71385	15.5047	0.850421	34.7963	17.1043	25.093	167.547	167.547	42.7455	3.30873	0	0	1	0	0	1	4.62888	1.27789	0	1	0	TEST
62	2.73861	3.88449	1.61586	4.46014	1.32052	3.86933	2.3682	4.81636	11.1526	0.473608	4.967	3.58727	5.1708	1.52672	12.0931	1.43056	86.3781	45.5898	35.0225	74.1711	35.0225	89.5052	3.08095	0	0	1	0	1	1	2.58981	0	0	1	1	TRAIN
63	3.24037	3.02901	5.36239	5.02634	0.677544	4.51603	1.53379	5.02686	11.183	0.308844	5.17111	3.6166	7.43115	1.81123	10.6503	1.6851	32.3363	0	13.2624	76.2926	76.2926	78.8282	3.88131	-0.29384	0	1	0	0	0	2.20714	0	0	1	0	TEST
64	2.12132	2.11978	4.44837	4.70953	1.08979	4.65108	2.02539	5.10037	11.6529	0.416045	5.02224	3.54243	7.43173	2.19945	8.14082	1.00558	59.2913	16.0469	69.3475	15.6512	15.6512	230.541	3.79562	-0.863117	1	1	1	0	1	-1.41983	1.41421	0	1	0	TRAIN
65	3.60555	5.02316	3.39008	2.56495	1.84367	4.0374	3.39798	4.66119	11	0.392153	4.7224	3.33648	7.47725	2.36266	5.29124	0.894553	121.893	15.4378	37.4896	21.741	21.741	183.858	3.73941	-2.22413	1	1	1	0	1	-3.85231	0	0	0	1	TEST
66	2.64575	2.07006	3.90237	6.83003	0.820009	4.44064	1.65456	5.08101	13.0548	0.570686	5.45024	3.85799	7.81518	1.98957	8.75084	1.44284	119.693	5.59396	45.6623	74.9029	74.9029	117.889	4.61121	0	2	1	0	0	1	2.22259	2.17435	1	1	0	TRAIN
67	4.74342	6.60813	6.80058	7.10235	0.44335	5.10411	1.29379	5.36005	13.4567	0.196655	6.00961	3.8309	7.81497	1.92926	18.7598	0.912311	67.4293	0	84.7193	201.506	201.506	155.934	3.94773	-0.813694	2	1	0	0	1	3.89358	0.285714	1	1	0	TRAIN
68	3.4641	3.28847	5.16582	5.78026	0.875795	4.19582	1.8729	5.25363	14.1962	0.478157	5.65571	3.74018	7.42769	1.80427	17.8775	0.599231	51.0755	56.7457	3.47266	148.137	140.755	113.351	3.90855	-0.201985	2	1	1	0	1	0.906453	1.41421	1	1	0	TEST
69	1.73205	2.51979	1.10148	5.71949	0.797212	2.68872	1.59866	4.59942	9.78267	0.47149	4.88112	3.6155	4.94954	1.65789	5.19841	0.791902	0	33.326	0	100.276	100.276	33.326	2.7242	0	1	1	1	0	1	3.2464	0	0	1	1	TRAIN
70	2	3.57143	2.5625	0	3.91556	2.59491	2.53954	4.17009	4	0.983353	3.75114	3.04819	7.26675	2.09546	3.07805	0	0	16.663	0	16.7928	16.7928	43.4991	2.40204	0	2	1	1	0	0	-0.410018	1	1	0	1	TEST
71	2.82843	5.44241	3.55194	0	1.90689	3.5014	2.95482	4.36994	8	0.465179	4.20285	3.12656	7.26367	1.78861	5.48383	0.982534	0	16.663	26.9309	26.9309	26.9309	43.4991	2.5929	0	2	1	1	0	1	1.34954	1	1	0	1	TRAIN
72	3.16228	4.09973	3.70324	0	2.52653	3.00097	3.3766	4.69074	8	0.550606	4.25356	3.26958	7.26392	1.7545	5.48383	0.12145	0	16.663	35.3008	35.3008	35.3008	43.4991	2.89605	0	2	1	1	0	0	1.34954	1	1	0	1	TRAIN
73	2.54951	2.65937	4.70027	4.93447	0.973142	4.72641	1.98108	5.06848	12.0505	0.368009	5.16832	3.58058	7.4459	2.14707	8.51748	1.10338	65.9944	44.481	32.4948	32.5732	32.5732	167.501	3.83956	-0.681101	2	1	1	0	1	-0.569506	0.877205	0	1	1	TRAIN
74	1.22474	1.41925	3.29111	0	1.90252	2.93121	2.34085	4.73205	9.00288	0.665553	4.47411	3.41564	7.45998	2.57448	3.32296	0	84.8441	4.27582	38.556	16.2197	16.2197	75.4348	3.86689	-1.84375	0	1	0	0	0	-1.62929	0	0	1	0	TRAIN
75	2.64575	2.69449	1.98064	7.22943	0.825941	4.62925	1.70082	5.2393	14.1323	0.399138	5.30563	3.90406	5.19925	1.68022	9.04872	1.01395	74.7204	0	36.6982	89.2866	89.2866	94.1311	3.33361	0	1	1	1	0	1	3.28468	1.88988	0	1	1	TRAIN
76	2.23607	3.47136	0.981334	5.71949	0.635483	3.03915	1.47111	4.54209	9.83774	0.37429	5.00244	3.60756	4.87763	1.66418	6.06518	2.17889	41.637	0	33.326	119.228	119.228	33.326	2.66857	0	1	1	1	0	1	3.70424	0	0	1	0	TRAIN
77	1.22474	1.18014	3.00648	0	1.78218	3.03915	2.12502	4.49889	8.14633	0.758002	4.31229	3.57316	7.43739	2.01512	3.23941	3.79065	48.3402	0	0	61.991	61.991	25.1449	2.98268	0	0	0	0	0	0	1.76878	0	0	1	0	TRAIN
78	0	0.845194	0	0	2.05599	1	2	4	7.5	1	3.96796	3.45249	4.45249	1.63266	2.51662	0	0	0	0	56.8575	56.8575	0	2	0	0	0	0	0	0	2.25492	0	0	1	1	TEST
79	1.41421	2.01087	1.60887	5.90127	0.970676	2.93121	1.78032	4.87996	10.3006	0.484617	4.8716	3.75418	4.83362	1.73404	5.75312	0.708483	0	0	0	87.6946	87.6946	65.7944	2.89086	0	0	1	0	0	1	2.51419	0	0	1	1	TRAIN
80	2	1.24429	0.309074	8.69921	0.791733	3.49173	1.48723	5.38571	24.5011	0.55771	5.38013	4.16696	4.93828	1.7313	6.29155	1.19479	0	0	0	134.299	134.299	0	3.38571	0	0	0	0	0	0	5.55063	0	0	1	1	TRAIN
81	1	0.661506	1.61787	5.64516	1.69967	3.64022	1.96977	4.80194	12.895	0.924366	4.53935	3.82337	5.04807	1.72147	3.36635	0	0	16.6073	0	66.5299	66.5299	9.50735	2.8823	0	0	0	0	0	0	1.8343	0	0	1	1	TRAIN
82	1.41421	1.92917	1.45455	5.90127	1.09151	3.44726	1.88218	4.92965	10.7917	0.540835	4.90852	3.71139	5.22063	1.78162	5.30077	1.27412	50.3566	3.79819	3.79819	56.6929	56.6929	116.151	2.95591	0	0	1	0	0	1	2.33102	0	0	1	0	TRAIN
83	1.87083	1.37238	3.20093	0	1.76418	3.1899	2.22836	4.73205	8.47908	0.685565	4.44792	3.61484	7.47823	2.20385	3.69805	1.84296	68.7381	0	0	51.4767	51.4767	67.8283	3.57478	-0.879074	0	0	0	0	0	1.69999	0	0	1	0	TRAIN
84	2.64575	2.37628	4.8951	5.29047	0.95418	3.75343	1.83562	5.03515	10.3068	0.400211	5.00693	3.69074	7.4275	1.9911	6.47881	1.43762	30.2784	0	0	106.267	106.267	67.8283	3.82989	-0.271481	0	0	0	0	0	2.70178	0	0	1	0	TRAIN
85	1	0.625456	0.882593	5.64516	1.69967	2.95021	1.96977	4.80194	12.895	0.942838	4.55451	3.78965	5.11197	1.71449	3.0885	0	33.326	0	20.8288	42.1933	42.1933	33.326	2.8823	0	0	1	1	0	1	1.05499	0	0	1	0	TRAIN
86	2.34521	2.96224	3.39485	3.8408	1.20863	3.55852	2.04692	4.5433	8.95375	0.492024	4.58737	3.55345	7.43463	1.86882	5.17334	1.39982	32.3363	0	13.4176	71.1757	71.1757	36.1448	3.63418	-0.241803	0	0	0	0	0	2.08272	0	0	1	0	TRAIN
87	1.22474	1.3319	2.53759	0	1.78218	3.20282	2.12502	4.49889	8.14633	0.726721	4.23751	3.54913	6.26875	1.90323	3.76321	1.42825	0	0	0	50.5668	50.5668	42.6833	2.75296	0	0	0	0	0	0	1.59114	0	0	1	0	TEST
88	1.22474	1.51199	1.4158	0	1.78218	3.05656	2.12502	4.49889	8.14633	0.758973	4.52088	3.55265	4.6462	1.70005	8.35537	2.63294	0	0	2.84956	92.565	53.4164	39.1486	2.85588	0	0	0	0	1	0	2.94167	0	0	1	0	TEST
89	1.73205	2.58318	3.63763	5.6418	0.956211	4.20987	1.80157	4.8933	10.8327	0.441316	5.08967	3.72345	6.31211	1.83173	10.8125	1.27628	42.6833	0	2.53453	127.365	88.2163	81.832	3.20149	0	0	0	0	1	0	3.93036	0	0	1	0	TRAIN
90	1.87083	2.44684	0.806852	4.27493	1.27771	3.33718	2.01724	4.52064	8.63444	0.566593	4.75783	3.56331	5.14562	1.69511	7.45879	1.5317	13.9457	0	18.8912	111.81	111.81	61.9776	3.30761	0	0	1	0	0	1	3.33039	0	0	1	0	TEST
91	1.87083	2.47255	2.24053	3.8408	1.27771	3.33718	2.01724	4.52064	8.63444	0.632617	4.74026	3.56082	6.81724	1.81385	7.45879	2.56518	14.9669	0	31.959	98.6529	98.6529	31.0594	4.63564	0	0	1	0	0	1	2.6253	0	0	1	0	TRAIN
92	2.64575	2.82459	4.30794	5.73597	0.927454	4.20897	1.84796	4.95354	11.1216	0.403058	5.10659	3.67905	7.43762	2.03826	7.01342	1.64077	51.1002	0	47.3242	69.6985	69.6985	113.873	3.58989	-0.590637	2	1	1	0	1	0.805919	1	1	1	1	TRAIN
93	3.16228	2.53568	2.75653	0	3.63351	2.87951	3.82468	5.30278	8	0.572416	7.5824	3.29244	6.28052	1.93377	72.1019	0	0	0	4.80812	96.7163	4.80812	85.3667	3.44816	0	0	0	0	0	0	1.39307	0	0	0	1	TRAIN
94	3	5.00127	1.78472	0	2.2822	2.79661	3.22305	4.5231	8	0.499168	4.68999	3.09702	4.65308	1.56551	15.6221	1.01226	10.9999	0	23.3495	101.647	23.3495	89.2972	3.04872	0	0	0	0	1	0	2.27386	0	0	0	0	TRAIN
95	1.73205	4.53247	0.883873	0	2.34038	1.48438	2.19061	3.61803	4	0.858057	4.39349	2.73247	4.80138	1.71661	11.0478	0	10.9999	47.0844	9.81483	88.1121	9.81483	89.2972	2.72119	0	0	0	0	1	0	0.799962	0	0	0	1	TRAIN
96	2.44949	4.58202	2.0924	6.5286	0.528877	3.75	1.37975	4.91072	11.6463	0.317547	5.79123	3.73016	5.09793	1.73492	22.1555	0.818456	57.1133	9.6292	18.0948	265.665	109.071	212.165	3.34642	0	0	1	0	1	1	4.38718	0	0	1	0	TRAIN
97	3.60555	3.76299	3.91484	7.45774	0.751839	4.67463	1.70991	5.18174	15.0203	0.373136	5.62951	3.91512	7.81491	2.05086	13.8187	0.710411	33.5711	3.68632	7.28512	104.007	104.007	169.685	3.78215	0	2	1	0	0	1	2.63061	1.06366	1	1	1	TEST
98	3.08221	3.23239	3.28533	7.28087	0.829427	4.61874	1.72961	5.18059	14.4119	0.404207	5.45969	3.89994	6.26881	1.81308	13.1954	1.03291	33.5711	15.4574	6.35555	110.727	110.727	118.938	3.29231	0	0	1	0	0	1	2.54403	0.707107	0	1	0	TRAIN
99	3	7.88312	2.72112	0	1.82055	3.10539	2.91466	4.30278	8	0.39888	4.13497	3.01934	6.27573	1.8692	5.88961	0.654158	0	0	39.8726	21.8618	21.8618	85.3667	2.60976	0	0	1	0	0	0	-0.129455	0	0	0	0	TRAIN
100	2.82843	2.38149	3.2963	5.66837	0.996181	3.30167	1.92759	5.51128	10.7984	0.407625	5.04548	3.77496	6.31499	1.85604	7.71177	0.621563	85.3667	0	17.6504	99.8315	99.8315	85.3667	3.85888	0	0	0	0	0	0	3.30571	0	0	1	0	TRAIN
101	2.23607	1.57698	5.5763	6.96035	1.09061	2.875	1.96217	5.44949	20.4032	0.457534	5.30263	3.9844	7.4354	2.03369	7.48172	1.82847	60.5568	0	0	71.9412	71.9412	181.879	3.84105	-0.853333	0	1	0	0	1	0.736008	0	0	1	1	TEST
102	3.53553	3.82475	3.91948	5.22154	1.31953	4.19343	2.61547	5.04408	13.0498	0.380686	5.09781	3.74842	7.8149	2.16207	9.38993	1.33526	18.0108	0	4.21141	49.3068	49.3068	136.114	3.80642	0	2	1	0	0	1	0.89557	0.516398	1	1	1	TRAIN
103	3.80789	4.90485	4.06124	5.44147	1.22114	4.18234	2.60788	5.04707	14.0375	0.337371	5.18074	3.7485	7.8149	2.22021	10.617	1.19899	18.0108	0	6.31711	43.0161	43.0161	178.797	3.80672	0	2	1	0	0	1	0.428282	0.516398	1	1	0	TRAIN
104	1.73205	4.42995	0.845679	0	0	0	2.32379	4	3	2.1757	6.94491	2.98887	4.91382	1.43558	25.4803	0	11.7711	124.251	0	124.251	0	78.2973	3.29931	0	0	0	0	0	0	2.02624	0	0	0	1	TRAIN
105	1	2.48052	0.395833	0	0	1.40564	1.63299	3	2	1.25401	6.87603	2.63729	3.62637	1.19097	36.0045	0	0	0	11.2293	57.1834	11.2293	0	1.98403	0	0	0	0	0	0	1.59692	0	0	0	1	TEST
106	4.3589	2.65444	6.22688	6.3315	0.651659	5.58753	1.50657	5.97287	23.8184	0.276024	5.57388	3.79885	7.42921	1.90163	16.1135	1.09434	82.5566	11.7711	41.6828	83.9236	83.9236	157.656	4.4262	0.809252	0	0	0	0	0	2.01434	0	0	1	1	TRAIN
107	1.41421	3.85227	0.361111	0	3.1324	1.92193	1.97474	3.41421	3	0.910684	3.48005	3.09592	4.51571	1.66436	2.01329	0	0	0	0	50.4863	50.4863	31.5338	1.41421	0	0	0	0	0	0	1.5645	0	0	0	1	TRAIN
108	2.44949	3.96104	2.52083	0	0	1.42748	3.02372	5	4	0.802844	3.58301	3.16927	6.28903	1.75288	3.30493	0	0	0	26.4756	26.4756	26.4756	42.6833	3.25343	0	0	0	0	0	0	0.799962	0	0	0	1	TRAIN
109	3.67423	5.13348	5.24324	5.49717	0.729925	4.48755	1.78107	5.07365	13.0255	0.278897	5.32835	3.73801	7.43765	1.90189	10.5065	1.308	64.6725	0	23.079	132.305	132.305	72.2896	3.76263	-1.02537	0	0	0	0	0	4.0913	0	0	1	1	TRAIN
110	1.73205	4.28571	1.19054	0	2.34038	3.03915	2.19061	3.61803	4	0.61245	3.9894	2.80275	4.5618	1.42443	8.53172	0	0	0	16.7438	55.8925	16.7438	39.1486	2.18347	0	0	0	0	1	0	2.2264	0	0	0	0	TRAIN
111	3.31662	6.98916	3.21852	1.09861	1.74	3.94839	3.26129	4.47241	11	0.329141	4.46081	3.05656	7.52898	1.8531	7.3791	1.19174	25.3735	19.1611	26.1765	23.1747	23.1747	87.2179	2.90682	0	2	1	1	0	1	1.22846	1	1	0	1	TEST
112	3.87298	3.0798	4.39838	4.80811	1.70879	2.90466	2.94137	5.4892	13.4678	0.422417	4.95913	3.83548	6.31222	1.68531	9.27017	0.757941	42.6833	0	52.9512	81.4604	81.4604	85.3667	3.72665	0	0	0	0	0	0	3.2965	0	0	1	0	TRAIN
113	2.73861	2.08657	3.57058	3.1689	1.84795	3.44882	2.60892	5.3753	10.4111	0.546548	4.63759	3.74927	6.31215	1.61786	6.20641	0.964321	42.6833	0	35.3008	70.1007	70.1007	42.6833	3.60946	0	0	0	0	0	0	3.10473	0	0	1	0	TRAIN
114	3.74166	5.08734	3.10635	1.60944	2.12391	4.05351	3.76646	4.79087	12	0.396595	4.80521	3.33871	7.81704	2.29945	6.86423	1.44247	25.3735	21.0602	68.562	17.8991	17.8991	126.953	3.64272	-0.617176	4	1	1	0	1	1.11746	2.37841	1	0	0	TEST
115	3.16228	3.80391	3.29079	0	2.27611	3.78494	3.39779	4.70703	9	0.453576	4.42039	3.23301	7.53268	2.12291	5.75025	1.638	50.5184	23.4369	51.899	20.2758	20.2758	102.577	3.61985	-0.788472	2	1	1	0	1	0.0808774	1	1	0	1	TRAIN
116	3.74166	2.86488	4.38449	4.52315	1.75686	2.73885	2.9092	5.48769	12.9212	0.442727	4.90282	3.83692	6.31157	1.46846	8.52589	0.798574	42.6833	0	61.7764	90.2856	90.2856	42.6833	3.72468	0	0	0	0	0	0	4.17729	0	0	1	0	TEST
117	2.64575	2.05471	3.0224	0	1.64757	2.99249	2.39362	5.31281	9.34599	0.552633	4.55037	3.68139	6.31273	1.6771	5.61417	0.948118	42.6833	0	26.4756	67.5662	67.5662	42.6833	3.53825	0	0	0	0	0	0	2.81326	0	0	1	0	TRAIN
118	2.64575	6.81492	2.98524	0	1.81211	3.68418	2.71584	4.23321	7	0.439587	4.09373	3.09931	7.44027	1.90717	4.90137	1.43889	25.1449	4.27582	66.9079	20.2758	20.2758	58.0421	3.46621	-0.431991	0	1	0	0	1	0.159831	0	0	0	0	TRAIN
119	1	0.597815	2.8875	0	2.44893	3.02206	2.11237	4.73205	5.40431	0.893785	3.973	3.33783	7.43215	2.04819	3.30907	0	32.3363	0	11.3597	18.5511	18.5511	36.1448	3.78298	-0.0671296	0	0	0	0	0	0.194172	0	0	0	1	TRAIN
120	0.707107	0.791552	3.02083	0	2.80336	3.08496	2.18411	4.30278	7.02555	0.89145	3.92119	3.22254	7.43116	2.05545	3.30907	0	32.3363	0	9.66145	16.8528	16.8528	36.1448	3.69488	-0.0462963	0	0	0	0	0	0.194172	0	0	0	0	TEST
121	2.54951	2.79787	3.1258	4.96109	1.21814	4.20184	2.21294	4.83073	10.2864	0.466073	4.81649	3.70649	7.47863	2.30969	5.43904	1.67579	154.105	0	0	51.4767	51.4767	153.195	3.47377	-1.06244	0	0	0	0	0	0.889203	0	0	1	1	TRAIN
122	1.87083	1.09248	4.67204	5.10405	1.51059	3.7406	2.22635	5.29663	14.3858	0.59413	4.93847	3.78499	7.44426	2.01313	6.16671	0.813587	92.1697	9.36049	16.7663	47.8729	47.8729	67.0754	3.9747	-0.676574	0	1	0	0	1	0.736281	1.19055	0	1	0	TRAIN
123	4.52769	7.18785	6.3901	7.78327	0.328707	5.47613	1.03456	5.20082	14.0341	0.190125	6.05348	3.94905	7.43932	1.77496	19.3206	1.22991	124.133	23.1644	61.9906	184.99	184.99	160.941	3.81165	-1.49664	1	1	1	0	1	5.69412	0.71956	0	1	0	TRAIN
124	0.707107	1.97476	3.57194	0	1.81789	3.72161	2.16596	4.36234	9.73335	0.599181	4.11486	3.1999	7.4268	1.87031	4.53917	0	29.8496	0	30.2546	16.9485	16.9485	25.1449	3.57535	0.224537	0	1	0	0	0	0.575325	0	0	0	0	TRAIN
125	3.53553	2.86427	5.09739	4.64439	1.1106	3.79192	2.0889	5.36887	14.0686	0.47602	5.62612	3.63773	7.44377	2.04013	25.6668	1.31241	59.6992	90.0684	6.58762	222.006	65.4119	206.884	4.86255	-0.557392	0	1	0	0	1	2.35658	0	0	1	1	TEST
126	2.54951	2.03811	4.09156	6.38145	1.07068	3.99795	1.91086	5.04122	13.8951	0.514386	4.97427	3.86941	7.43401	1.85252	6.18944	1.1883	25.1449	6.7625	18.0108	91.882	91.882	36.1448	3.66964	-0.452451	0	1	0	0	1	2.22241	0	0	1	1	TRAIN
127	2.44949	5.14286	0.715278	0	0	0	3.02372	5	4	1.90663	4.93606	3.24745	5.30708	1.39274	3.04731	0	0	156.595	0	156.595	0	156.595	3.83	0	0	0	0	0	0	2.2264	0	0	0	1	TRAIN
128	3.31662	3.49984	3.05708	0	2.58753	3.64022	3.60334	4.74722	9	0.516762	4.55171	3.29295	7.53329	2.52071	4.21435	2.52088	119.257	23.4369	38.0047	7.2914	7.2914	170.405	3.71231	-2.53167	2	1	1	0	1	-1.59747	1	1	0	1	TEST
129	3.87298	3.35527	4.27868	0	2.73776	3.46347	4.11176	5.40322	11	0.440597	6.96549	3.47627	7.45189	1.97472	42.0304	1.09999	54.9945	4.27582	73.6274	77.654	31.6999	83.187	4.18186	-1.18914	0	1	0	0	1	0.875472	0	0	0	0	TRAIN
130	5.83095	11.6575	0.372446	6.2634	0.411456	4.3656	1.46036	5.42928	17.3867	0.137974	5.79782	3.68127	4.47108	1.40283	19.5737	0.683635	0	0	103.459	261.611	261.611	0	3.66784	11.1441	0	0	0	0	0	8.95737	0	0	1	0	TRAIN
131	1	1.06509	2.66926	0	2.09129	2.80735	2.2794	4.73205	8.52789	0.833695	4.30317	3.62064	6.39076	2.07502	3.58691	0	85.3667	0	0	37.905	37.905	85.3667	2.9945	0	0	0	0	0	0	0.893132	0	0	1	1	TRAIN
132	5.14782	8.28761	5.16735	5.61586	0.939239	4.74774	2.49815	5.10299	17.1472	0.229481	5.41353	3.7366	7.43101	1.77593	14.7681	1.35553	55.4233	4.27582	103.007	112.885	112.885	103.973	3.68631	-0.390656	0	1	0	0	1	1.69589	0.426401	0	1	0	TEST
133	2.23607	1.96743	3.52756	3.1689	1.81771	3.96982	2.59614	5.07057	10.6986	0.630977	5.09566	3.79461	7.47826	2.10123	12.0597	2.29212	68.7381	0	0	111.103	32.8059	179.023	3.6549	-1.14426	0	1	0	1	1	2.31894	0	0	1	0	TRAIN
134	3.74166	6.389	3.44511	4.97285	0.950591	4.30056	2.2246	4.86193	12.5225	0.287498	5.30519	3.63517	7.47654	1.89393	19.5823	0.874148	68.7381	0	17.5141	140.569	62.2713	146.126	3.59602	-0.7435	0	1	0	0	1	3.43174	0	0	1	1	TRAIN
135	4.24264	4.76837	4.30479	4.99974	1.1137	4.5625	2.4868	4.99755	12.9517	0.309412	5.46229	3.70201	7.81493	2.29385	17.4813	0.913135	29.8496	11.7711	18.0108	126.849	48.552	239.556	3.8355	-0.756162	2	1	0	0	1	1.22806	0.142857	1	1	0	TRAIN
136	3.4641	1.34958	2.5078	5.14749	1.47099	4.1683	2.20299	5.99532	15.9658	0.534434	5.85948	3.96648	5.16911	1.8437	31.2406	1.55168	7.00121	0	2.53453	322.725	9.53574	313.189	4.79745	0.393719	0	0	0	1	0	5.46867	0	0	1	0	TRAIN
137	4.12311	1.51931	4.34571	4.78749	1.75063	3.56704	2.68411	5.995	14.0946	0.490334	5.78187	3.96927	7.48146	2.23324	22.8301	1.60131	144.478	0	0	243.713	8.82096	370.548	4.82245	-3.7525	0	0	0	1	0	2.61689	0	0	1	1	TEST
138	1.73205	2.79642	2.07414	5.66837	0.832833	3.68386	1.68123	4.73205	10.2277	0.457227	5.0988	3.67197	4.91145	1.71376	10.5357	0.711318	0	0	0	131.703	92.5542	83.0457	3.09928	0	0	1	0	1	1	3.32201	0	0	1	1	TRAIN
139	2.23607	1.67871	3.61003	0	2.07714	3.6645	2.6343	5.03323	9.64701	0.65906	5.14911	3.67069	7.43351	2.12049	13.072	0	35.8369	23.5422	0	131.323	13.8775	196.274	3.96882	-1.04818	0	0	0	1	0	1.13083	0	0	0	1	TRAIN
140	3.4641	3.45872	5.65437	5.49909	0.992977	4.3749	2.07481	5.52543	12.7773	0.440164	5.65855	3.903	7.71479	2.18882	18.8537	0.951954	113.051	0	25.9149	106.928	67.7793	151.29	4.72709	-1.23849	0	1	0	1	1	2.37444	0	1	1	1	TRAIN
141	2.73861	2.06345	3.29509	4.72184	1.5888	3.5	2.52604	5.00598	10.8381	0.598294	5.15121	3.78459	7.81914	2.58612	6.77577	0.761271	0	0	0	76.5915	37.4428	140.642	3.84173	0	4	1	0	1	1	2.50712	0	1	1	0	TEST
142	2	1.53635	3.14287	3.44601	1.86897	3.52164	2.39604	4.9225	9.3487	0.746098	4.8664	3.70954	7.81492	2.25534	7.35762	3.5434	0	0	0	83.311	44.1623	89.8956	3.81686	0	2	1	0	1	1	2.50857	0	1	1	0	TEST
143	2	1.78028	3.0747	0	1.59711	3.09307	2.2599	4.77007	8.95374	0.701107	4.86568	3.68301	7.81491	2.25079	7.35762	0.0910644	0	0	0	83.311	44.1623	89.8956	3.77853	0	2	1	0	1	1	2.50857	0	1	1	0	TRAIN
144	1.22474	1.41721	1.48898	0	1.92125	3.5	2.34623	4.80696	8.99801	0.774708	4.66345	3.68839	5.00524	1.72422	8.67239	1.36988	0	0	0	76.5915	37.4428	104.943	3.14245	0	0	1	0	1	1	1.51435	0	0	1	1	TEST
145	1.22474	1.41721	1.47028	0	1.92125	3.375	2.34623	4.80696	8.99801	0.774014	4.66319	3.68671	4.99836	1.72525	8.67239	2.73975	0	0	0	76.5915	37.4428	104.943	3.04858	0	0	1	0	1	1	1.51435	0	0	1	1	TRAIN
146	1.22474	1.43615	1.62284	0	1.92125	3.69012	2.34623	4.80696	8.99801	0.764165	4.65488	3.69583	4.92434	1.69882	8.95174	1.94464	0	0	8.8252	85.8455	46.6969	72.0458	3.17577	0	0	1	0	1	1	2.46067	0	0	1	0	TRAIN
147	1.22474	1.43615	1.5362	0	1.92125	3.69012	2.34623	4.80696	8.99801	0.762713	4.65462	3.69355	4.92348	1.69888	8.95174	4.08593	0	0	8.8252	85.8455	46.6969	72.0458	3.06614	0	0	1	0	1	1	2.46067	0	0	1	0	TRAIN
148	2.64575	5.41444	2.65278	0	5.18377	1.40564	3.16849	5.08613	5	0.857228	4.33048	3.12399	8.51244	3.02663	6.06785	0	0	0	10.6091	49.7577	10.6091	84.029	4.27738	0	0	0	0	0	0	2.02624	0	0	0	1	TRAIN
149	3	4.51157	3.59063	6.08812	0.802305	4.629	1.83647	4.98289	12.8796	0.376476	5.48722	3.73949	7.47657	1.8588	16.8017	0.973084	102.309	45.2414	37.2539	143.954	104.805	140.548	4.46385	-0.923506	0	1	0	1	1	3.37464	0	0	1	1	TRAIN
150	3.4641	5.83108	4.57105	6.1298	0.701515	4.92604	1.77166	4.98293	13.5452	0.313085	5.56435	3.7396	7.42684	1.80112	19.2647	1.11746	63.4206	45.2414	57.3704	149.854	110.706	140.548	4.46164	-0.192904	0	1	0	1	1	2.6893	0	0	1	1	TEST
151	2.12132	1.83499	3.88148	2.78424	1.6075	3.33718	2.23954	4.77442	8.7761	0.602564	4.73562	3.62181	7.42604	1.99099	8.78952	1.6013	30.2784	0	2.84956	97.6985	58.5499	64.2936	3.6355	-0.025679	0	0	0	1	0	2.41951	0	0	1	0	TRAIN
152	3	3.24477	4.12764	4.86175	1.17549	3.97018	2.23855	4.82223	10.4679	0.426004	5.02269	3.67392	7.43123	2.05016	10.7522	0.861375	60.128	0	29.6855	104.509	65.3602	89.4385	3.63687	-0.26161	0	1	0	1	1	1.88588	0	0	1	0	TRAIN
153	1	1.48997	1.445	0	1.84795	3.09307	2.19238	4.56155	8.30668	0.833227	4.56889	3.61736	4.90598	1.7175	8.05541	5.8715	0	0	0	83.311	44.1623	72.0458	2.93675	0	0	1	0	1	1	2.12714	0	0	1	0	TEST
154	2.64575	2.336	2.49436	5.29047	1.35452	3.83659	2.31863	4.83832	10.3433	0.500732	5.05073	3.72348	6.85571	1.99058	7.76638	0.940228	33.2035	0	62.1187	129.605	90.4565	101.267	4.23403	0.0491667	0	1	0	1	1	1.96515	0	0	1	0	TRAIN
155	0.707107	1.20156	1.42858	0	2.02243	2.68872	2.12292	4.41421	7.8978	0.955389	4.46563	3.55357	4.84007	1.71718	7.42805	0	0	0	0	90.0305	50.8818	39.1486	2.90592	0	0	0	0	1	0	2.87614	0	0	1	1	TRAIN
156	3.60555	3.27263	5.29755	6.05898	1.0605	3.85057	2.1295	5.65627	11.7229	0.371196	5.48551	3.80171	7.43329	1.9097	17.9002	1.01144	32.3363	0	13.4176	188.089	109.791	157.125	4.41136	-0.74107	0	0	0	1	0	3.93232	0	0	1	0	TRAIN
157	1.73205	4.62475	0.996914	0	0	0	2.32379	4	3	2.59221	7.59293	3.02338	4.68732	1.31129	38.0943	0	11.7711	131.057	0	131.057	0	39.1486	3.50714	0	0	0	0	0	0	2.2264	0	0	0	0	TRAIN
158	1.73205	3.53384	2.09877	0	0	0	2.32379	4	3	1.28284	4.05761	2.81745	8.36011	2.81846	4.35763	0	11.7711	39.1486	8.42978	47.5784	8.42978	69.0689	3.52685	0	0	0	0	0	0	1.36388	0	0	0	0	TRAIN
159	1	2.28571	0.887346	0	0	1.40564	1.63299	3	2	1.12095	3.73098	2.57972	4.57577	1.41697	7.14033	0	0	0	11.6748	50.8234	11.6748	39.1486	2.04823	0	0	0	0	0	0	1.36388	0	0	0	0	TEST
160	1	2.22078	2.0571	0	0	0	1.63299	3	2	1.39373	3.81444	2.50639	8.18937	2.43489	5.72707	0	0	23.5422	8.78501	47.9337	8.78501	54.1088	2.53531	0	0	0	0	0	0	1.11468	0	0	0	1	TEST
161	1.41421	3.41924	0.852623	0	3.1324	2.06717	1.97474	3.41421	3	0.970882	3.91848	2.63467	4.73057	1.63324	7.52832	0	10.9999	23.5422	4.90742	54.9391	15.7905	50.1485	2.51352	0	0	0	0	1	0	0.346878	0	0	0	1	TRAIN
162	2.82843	3.14586	4.17898	4.38593	1.22821	3.52206	2.2197	4.75766	9.89341	0.459832	4.94452	3.62876	7.4289	1.80145	10.885	1.17857	25.1449	4.27582	21.1351	104.38	65.2309	64.2936	3.65732	-0.150627	0	1	0	1	1	2.08633	0.5	0	1	1	TRAIN
163	3.4641	4.73476	2.5104	7.5808	0.451826	5.16745	1.23622	5.2189	16.1412	0.253663	5.92196	3.94036	5.07273	1.59056	23.1628	1.09043	40.7386	1.3584	67.1744	224.56	185.412	89.2602	3.56226	0.929202	1	1	1	1	1	6.92744	1.31037	0	1	0	TRAIN
164	3.53553	2.91598	4.26577	6.13489	1.13223	4.16391	2.16147	5.61182	11.4721	0.401622	5.37458	3.79544	7.44471	1.91302	12.0186	1.05901	25.1449	58.8854	32.8972	181.421	142.272	131.512	4.40954	-0.942821	0	1	0	1	1	3.34922	0	0	1	1	TRAIN
165	2	3.45312	1.98157	5.86603	0.887417	4.08878	1.81576	4.98384	11.3045	0.543121	5.62864	3.79733	5.03998	1.75031	22.3704	0.878241	0	0	0	262.775	106.181	156.595	4.5792	0	0	0	0	1	0	5.98889	0	0	1	0	TRAIN
166	2	3.76623	1.03858	0	3.91556	2.92193	2.53954	4.17009	4	0.950584	4.20207	3.30659	4.92591	1.71476	7.31296	0	3.50061	0	0	83.6593	44.5107	70.6825	2.80012	0.490741	0	0	0	1	0	1.97394	0	0	0	1	TRAIN
167	2.23607	1.78268	2.70454	4.92499	1.86581	3.09307	2.82398	5.26708	12.2282	0.625891	5.48873	3.92416	6.82505	2.02128	10.5594	0.245154	33.2035	0	62.1187	210.172	53.5771	218.713	4.16582	0	0	1	0	1	1	3.13271	0	0	1	1	TRAIN
168	4.89898	5.90629	4.49887	2.89037	2.09893	4.87118	4.58662	5.02796	19	0.277761	5.2485	3.36997	7.53226	2.42793	15.3765	0.901635	98.8586	23.4369	25.9678	59.8039	20.6552	304.706	3.70321	-1.10881	2	1	1	0	1	-2.08006	1.41421	1	0	1	TRAIN
169	3.74166	4.4403	4.70201	4.39522	1.15244	4.28173	2.38192	5.38911	11.5437	0.458117	5.52374	3.85006	7.71706	2.13707	16.2784	1.58541	69.4579	4.27582	47.8812	105.654	66.505	108.607	4.68916	-0.734444	0	1	0	1	1	1.42588	0	1	1	0	TEST
170	2	1.37426	5.22296	6.79347	1.09244	3.77736	1.89529	5.38614	19.5016	0.491201	5.21422	3.94682	7.43556	2.23943	5.76853	1.11438	145.923	0	0	79.8667	79.8667	135.657	3.817	-0.900741	0	0	0	0	0	2.29563	0	0	1	1	TRAIN
171	3.4641	5.11459	2.42713	3.78277	0.816931	4.5744	1.96098	4.724	10.969	0.321301	5.14571	3.59754	6.82323	1.63874	12.0254	0.948368	53.3481	4.65584	124.758	85.5503	85.5503	64.6304	4.25314	0.50375	0	1	0	0	1	0.820875	0	0	0	0	TRAIN
172	3.80789	3.24857	3.93582	5.55755	0.815611	4.07782	1.77281	5.35198	9.67137	0.365233	5.36795	3.73991	7.47739	1.95021	17.7321	1.07328	68.7381	0	20.1849	145.726	67.4288	157.125	4.09902	-1.00528	0	0	0	1	0	2.79035	0	0	1	1	TRAIN
173	4.12311	3.86781	3.31556	0	2.83726	3.40399	4.33853	5.42084	12	0.408961	4.78753	3.48438	7.48644	2.76968	6.29215	0.966911	206.214	0	5.06906	7.79869	7.79869	246.168	4.14512	-5.01889	0	0	0	0	0	-1.16923	0	0	0	0	TRAIN
174	2.64575	1.80586	5.02824	5.71703	1.29418	4.55423	2.26711	5.38203	16.6487	0.442854	5.134	3.87361	7.48327	2.19097	8.40284	1.4243	152.7	11.7711	26.4756	56.7954	56.7954	146.656	3.84063	-1.82747	0	0	0	0	0	1.90425	0	0	1	1	TEST
175	3.60555	4.14489	3.97313	6.21897	0.688559	4.15557	1.68591	5.33308	11.3895	0.300932	5.37417	3.76076	7.47738	1.88566	14.2085	0.505508	79.738	0	22.2428	151.169	112.02	117.977	4.09125	-0.971959	0	0	0	1	0	3.66432	0	0	1	0	TRAIN
176	3.60555	3.89364	4.5628	4.68617	1.21037	3.9134	2.39138	5.36929	11.085	0.395724	5.09756	3.63882	7.43174	1.74887	12.9675	0.762255	32.3363	0	31.068	124.057	84.9084	86.2933	4.13534	-0.384306	0	0	0	1	0	2.93065	0	0	1	1	TRAIN
177	2.91548	1.41085	4.55421	7.02276	0.894431	5.06557	1.62788	5.79965	24.1751	0.443738	5.27655	3.90906	6.27306	1.67445	10.3808	1.0771	0	0	10.2991	81.2172	81.2172	64.6831	4.10125	0	0	1	0	0	1	2.16871	0	0	1	0	TRAIN
178	3.16228	3.42668	5.55721	7.03135	0.904276	4.61334	1.9531	5.31208	23.7833	0.341344	5.48947	3.89098	7.42761	1.6986	13.0139	1.14644	46.5217	0	23.0798	133.752	133.752	69.1445	3.59984	1.98235	0	1	0	0	1	1.57971	0	0	1	0	TEST
179	2.64575	2.62327	5.45436	6.86573	0.881711	4.71531	1.79852	5.30224	15.7477	0.389996	5.3372	3.85501	7.43146	1.83817	9.3783	1.03564	70.585	4.27582	46.3855	112.155	112.155	84.6138	3.81982	0.332632	0	1	0	0	1	3.31495	0.5	0	1	0	TRAIN
180	3.74166	4.04724	4.65288	6.42659	0.868614	4.34623	1.96125	5.29367	15.1592	0.409224	5.72784	3.83184	7.43317	1.78002	21.467	0.599207	61.3396	0	35.6604	183.607	132.798	137.218	3.81862	0.15398	0	0	0	1	0	3.17244	0	1	1	0	TRAIN
181	1.58114	1.5669	1.58785	0	1.69882	3.84423	2.32999	4.82491	9.33869	0.652647	4.47839	3.68356	4.84783	1.60441	4.99884	1.16231	0	0	8.8252	59.3228	59.3228	43.8971	3.02509	0	0	1	0	0	1	1.57988	0	0	1	1	TRAIN
182	1.58114	1.5669	1.6069	2.15104	1.7553	3.84423	2.35556	4.84544	9.40326	0.65939	4.47831	3.68161	4.88537	1.59724	4.99884	1.00009	0	0	8.8252	59.3228	59.3228	43.8971	3.07894	0	0	1	0	0	1	1.57988	0	0	1	1	TEST
183	1.73205	3.41558	2.31806	0	2.34038	3.02717	2.19061	3.61803	4	0.750162	3.72467	3.13107	7.43774	2.14418	2.72008	0	48.3402	0	8.8252	39.2018	39.2018	25.1449	2.81798	0	0	0	0	0	0	0.547502	0	0	0	1	TRAIN
184	2.23607	4.56917	1.63917	0	2.636	2.32193	2.62721	4.21432	5	0.809328	4.05643	3.29352	6.83226	1.79805	2.56782	0	16.1729	1.89909	113.639	18.072	18.072	113.639	3.92498	-0.196759	0	1	0	0	0	-0.919308	0	0	0	0	TRAIN
185	2.12132	1.37763	3.80259	5.42495	0.991919	4.68081	1.74297	5.03427	16.1256	0.485974	4.97512	3.61614	6.28369	1.99627	7.23344	0.81785	13.3278	27.928	51.5818	25.2374	25.2374	155.824	3.78788	0.358668	0	1	0	0	1	-0.0212809	0.5	0	1	0	TRAIN
186	4.94975	12.0684	5.31936	6.2653	0.309981	4.20184	1.07641	5.25964	28.997	0.140351	6.43238	3.52815	6.35489	2.23138	43.8436	0.934811	153.998	82.3977	0	2.51696	2.51696	1050.35	3.69461	0	0	0	0	0	0	-11.8202	0	0	1	0	TRAIN
187	0.707107	1.30133	3.46306	0	2.02243	2.79335	2.12292	4.41421	7.8978	0.651774	3.9875	3.24458	7.42413	1.86096	3.916	0	30.2784	0	12.6727	17.8061	17.8061	25.1449	3.62333	0.46412	0	0	0	0	0	1.05011	0	0	1	0	TRAIN
188	1.22474	0.999245	2.15398	0	2.17206	2.75	2.13996	4.41421	7.14792	0.733062	4.00814	3.29326	6.41096	1.78937	3.93945	0	2.75675	0	23.3856	12.8949	12.8949	56.0531	3.7715	0.972222	1	1	0	0	0	0.603611	0	1	0	1	TRAIN
189	3.16228	3.65557	5.18855	2.19722	1.53969	3.89246	2.53052	5.43266	10.3877	0.584011	5.30853	3.50766	7.38894	1.83862	21.1528	0.501634	38.0981	0	32.4833	108.354	19.1432	105.482	3.52364	0	0	1	0	0	1	1.96567	0.5	1	1	1	TRAIN
190	6.78233	22.6671	8.12954	5.73334	1.21436	5.13939	4.27088	5.28833	94.9551	0.111011	6.54347	3.58533	7.45065	1.8878	47.8735	1.19939	328.345	0	261.255	296.82	296.82	319.278	4.03939	-7.41864	0	1	0	0	1	-0.321041	3.67706	0	0	0	TEST
191	3	2.52251	3.76324	4.40672	1.33547	3.67531	2.30914	4.91472	10.0424	0.511408	4.82023	3.6645	7.43914	1.82449	6.00131	0.892165	67.0248	38.2882	61.3031	35.2007	35.2007	108.031	3.5388	-0.606291	2	1	1	0	1	0.1024	1.59054	0	0	1	TRAIN
192	2.82843	2.36616	5.17476	5.66837	0.996181	3.20281	1.92759	5.51128	10.7984	0.574388	5.46971	3.94876	7.71439	2.07894	10.7438	0.347074	44.313	0	0	90.4709	90.4709	110.107	5.35077	0	0	1	0	0	1	2.06125	0	1	1	1	TRAIN
193	2.82843	3.55079	1.98076	5.85883	0.987875	3.37878	1.94871	5.1071	10.9782	0.404707	5.55365	3.7398	4.90847	1.77845	23.56	1.41175	0	11.7711	0	245.777	89.1823	156.595	3.5515	0	0	0	0	1	0	5.93369	0	0	1	0	TEST
194	2.82843	3.42842	1.86039	6.01875	0.987875	3.16198	1.94871	5.1071	10.9782	0.426376	5.5824	3.81058	5.06506	1.77029	21.9387	1.40072	0	78.2973	0	252.778	96.1836	156.595	3.32702	0.964177	0	0	0	1	0	5.85389	0	0	1	0	TRAIN
195	3.31662	3.92333	2.00159	5.94198	1.0353	3.28039	2.03652	5.4373	11.2328	0.402776	5.68588	3.76093	5.14115	1.79542	26.5135	1.60591	0	117.446	0	284.926	89.1823	195.743	3.9601	0	0	0	0	1	0	6.16603	0	0	1	1	TRAIN
196	2.64575	4.45453	2.68565	6.33317	1.0234	2.63183	2.18729	5.3071	14.7671	0.445451	9.19258	3.95218	4.90611	1.4982	179.083	0.880567	0	0	0	500.579	41.0379	10.9999	3.79126	0	0	0	0	0	0	7.39351	0	0	1	1	TEST
197	4.58258	2.81221	6.54901	6.45205	0.630361	5.51665	1.48948	5.97307	23.4512	0.268273	5.65225	3.81874	7.43754	1.92428	15.7714	1.10184	97.7077	0	66.8169	103.919	103.919	156.903	4.37369	0.813006	0	1	0	0	1	2.30478	0	0	1	0	TRAIN
198	3	1.77721	5.36187	5.64545	0.82821	4.8492	1.62313	5.68366	21.3509	0.354939	5.14079	3.71126	7.42464	1.72798	10.9736	0.997437	30.2784	0	37.9267	55.722	55.722	67.8283	4.09632	2.0559	0	0	0	0	0	3.69577	0	0	1	1	TRAIN
199	3.60555	2.3842	5.44915	5.78383	0.687795	4.97221	1.52338	5.68403	20.3955	0.30442	5.29711	3.71235	7.43499	1.74911	12.5119	0.848468	62.6147	0	46.7519	71.7385	71.7385	61.2897	4.09635	1.88372	0	0	0	0	0	4.02575	0	0	1	1	TRAIN
200	4.30116	5.19815	5.66697	6.25611	0.571635	4.72439	1.50715	5.2188	11.775	0.256514	7.6962	3.74905	7.43127	1.76536	79.6878	0.996303	48.938	0	48.7098	244.711	152.803	78.2041	4.22661	0.43463	0	1	0	0	1	4.11458	0	0	1	0	TRAIN
201	4.41588	5.0971	6.50656	7.31477	0.413877	5.41531	1.18455	5.33302	20.9378	0.209285	5.94155	3.93812	7.43409	1.74047	20.1642	1.05305	75.6724	4.90088	31.7248	167.046	167.046	116.289	3.87719	-0.898834	0	1	0	0	1	2.29575	0.333333	0	1	0	TRAIN
202	4.3589	2.10354	8.85906	6.15273	0.826523	5.40719	1.7688	6.04548	22.9912	0.301561	5.49798	3.82819	8.18745	2.18856	14.8429	0.966403	60.5568	14.9601	36.6137	78.495	78.495	193.3	4.39403	-0.119873	0	0	0	0	0	1.85457	0	0	1	0	TEST
203	3.39116	2.00304	4.76369	7.02543	0.92112	4.20744	1.78966	5.21564	16.9095	0.417872	5.26532	3.90378	7.44531	1.917	8.07135	1.18957	59.6992	0	23.3093	111.427	111.427	50.2899	3.9102	-0.496563	0	1	0	0	1	3.34922	0	0	1	1	TEST
204	3.60555	4.06201	4.70471	4.97803	1.21653	3.75	2.49364	5.07241	13.4178	0.355364	5.1053	3.73528	7.43765	2.0267	8.05729	1.04536	64.6725	0	9.18477	118.33	118.33	103.823	3.76225	-1.16472	0	0	0	0	0	2.95017	0	0	1	0	TRAIN
205	2.82843	3.61917	2.86528	0	2.27245	2.98477	3.17534	4.4605	8	0.496155	4.32022	3.14049	7.52899	1.90056	4.75744	1.44105	25.3735	19.1611	7.2132	54.6977	54.6977	76.0684	2.95896	0	2	1	1	0	1	1.14535	1	1	0	1	TRAIN
206	2.34521	2.15733	3.38871	6.25365	0.988391	3.73216	1.88414	4.93209	10.859	0.503175	5.15771	3.76026	7.81538	2.05957	4.97389	1.02367	50.3566	9.24701	8.81818	35.5474	35.5474	176.405	3.78211	0	2	1	0	0	1	1.51638	0.536342	1	1	1	TEST
207	1.22474	1.28127	1.54065	0	1.92125	3.57662	2.34623	4.80696	8.99801	0.724614	4.38739	3.68534	4.8962	1.68945	4.34426	1.50267	0	0	8.8252	45.953	45.953	65.7944	2.94821	0	0	1	0	0	1	1.24635	0	0	1	1	TRAIN
208	1.87083	2.41326	5.02447	6.569	0.931916	4.51379	1.79299	5.18046	16.3317	0.427478	5.37062	3.82327	7.42625	1.82258	12.2651	0.998442	32.6063	0	22.0155	145.551	106.402	81.0791	3.77092	0.778059	0	1	0	1	1	3.35522	0.333333	0	1	0	TRAIN
209	3.937	5.25046	2.18481	5.10063	1.26607	4.02757	2.61673	5.2899	13.3875	0.456027	5.49707	3.67998	5.09662	1.56942	17.9156	0.91314	59.0738	4.8146	56.0675	125.505	113.846	95.4953	3.40581	0	0	1	0	0	1	2.43334	0	1	1	0	TRAIN
210	1.41421	1.2501	2.15241	6.37715	1.00887	2.55034	1.68249	5.04717	17.8615	0.601667	4.91258	3.75137	4.97548	1.68935	4.91384	0.0989079	0	0	0	96.7837	96.7837	21.9998	3.43906	0	0	0	0	0	0	1.97819	0	0	1	0	TRAIN
211	1.58114	1.09084	2.15324	7.38217	1.08036	4.17574	1.73917	5.03067	17.4489	0.669361	5.00189	4.01843	5.14062	1.77228	5.08029	0.273306	0	9.67242	0	83.9088	83.9088	42.4045	3.20992	0	0	1	0	0	1	2.24619	0	0	1	1	TRAIN
212	2.23607	4.24675	1.26413	0	3.13516	2.7813	2.75418	4.30278	5	0.807341	7.58506	3.07766	4.57527	1.51588	65.066	0	0	0	5.25362	136.31	5.25362	39.1486	2.99659	0	0	0	0	1	0	2.95734	0	0	0	1	TEST
213	3.74166	4.05354	3.1769	0	2.55693	3.25163	3.98516	4.98311	11	0.408794	7.59503	3.2944	6.36652	2.19852	74.3036	0.902025	0	0	4.80812	96.7163	4.80812	170.733	3.29146	0	0	0	0	0	0	0.0666682	0	0	0	1	TRAIN
214	1.41421	3.77574	0.451389	0	3.1324	1	1.97474	3.41421	3	1.12384	7.56266	2.80168	3.73363	1.34024	59.9638	0	0	0	4.80812	96.7163	4.80812	0	2.33612	0	0	0	0	0	0	2.2264	0	0	0	1	TRAIN
215	1.41421	1.55081	1.24287	6.17255	1.39563	4.08746	2.01499	5.04686	14.4188	0.769303	7.6204	3.89577	4.88264	1.62196	65.3358	1.7792	28.5566	0	11.1916	149.688	57.7797	16.7855	3.26872	0	0	1	0	0	1	3.47749	0	0	1	0	TRAIN
216	3.74166	6.35212	4.27603	1.79176	1.83236	3.84713	3.61214	4.76308	13	0.320811	4.68145	3.25035	7.53217	1.87127	8.25219	1.91872	50.5184	23.4369	53.0125	36.2758	36.2758	69.6795	3.6689	-0.38713	2	1	1	0	1	1.46254	1.41421	1	0	1	TRAIN
217	2.44949	4.50649	3.21836	0	0	1.40564	3.02372	5	4	1.22232	4.4994	3.18704	8.19672	2.17079	10.0962	0	0	78.2973	8.8252	87.1225	8.8252	93.2574	4.04995	0	0	0	0	0	0	2.02624	0	0	0	1	TRAIN
218	1.41421	1.61809	1.51867	0	1.96276	3	2.48727	4.96987	9.7152	0.762795	4.94315	3.75667	5.08466	1.72962	12.6079	1.81476	0	0	0	109.764	31.4672	144.092	3.34802	0	0	1	0	1	1	2.11588	0	0	1	0	TRAIN
219	2.44949	3.20779	2.43519	0	3.97067	2.375	2.9935	4.56155	5	0.891078	4.602	3.25869	7.47764	2.15101	8.58101	0	68.7381	11.7711	0	79.2072	0.909874	146.126	3.84271	-1.20988	0	0	0	0	0	0.586172	0	0	0	1	TRAIN
220	1.41421	3.39061	0.58179	0	3.1324	0.5	1.97474	3.41421	3	1.76263	4.44022	3.28483	5.27471	1.55135	3.80913	0	0	78.2973	0	112.988	34.6912	78.2973	2.39505	0	0	0	0	0	0	1.67196	0	0	0	1	TEST
221	1	1.38039	1.46562	0	2.09129	2.58496	2.2794	4.73205	8.52789	0.930164	4.79754	3.64811	4.98724	1.72542	10.969	0	0	0	0	123.203	44.9062	78.2973	3.28879	0	0	0	0	1	0	3.47767	0	0	1	0	TEST
222	1	1.67673	1.44191	0	1.84795	1.9183	2.19238	4.56155	8.30668	0.889328	4.79641	3.62743	4.92787	1.72678	10.969	0	0	0	0	123.203	44.9062	78.2973	3.02563	0	0	0	0	1	0	3.47767	0	0	1	1	TRAIN
223	1.73205	2.38514	1.84099	6.18826	0.987192	3.54659	1.88441	4.99175	11.2487	0.465958	5.29299	3.81591	4.99766	1.74808	15.1304	1.47687	0	0	0	154.041	75.7433	144.092	3.21156	0	0	1	0	1	1	3.58557	0	0	1	1	TRAIN
224	1.73205	1.84096	2.14515	6.60225	0.906348	3.45943	1.66434	5.07911	17.586	0.543972	5.31909	3.79689	5.03976	1.74235	12.8331	0.410585	0	0	0	163.13	84.8324	100.297	3.46991	0	0	0	0	1	0	3.04957	0	0	1	0	TEST
225	2.44949	4.44156	2.5517	0	0	0	3.02372	5	4	1.39349	4.543	3.14736	8.37068	2.47232	3.16001	0	0	78.2973	0	80.7514	2.45414	108.218	4.361	0	0	0	0	0	0	1.81696	0	0	0	0	TRAIN
226	1.73205	3.94943	0.929012	0	0	1.40564	2.32379	4	3	1.27327	4.3274	2.9373	4.88518	1.60877	10.9666	0	0	11.7711	8.8252	87.1225	8.8252	78.2973	2.89165	0	0	0	0	0	0	1.81696	0	0	0	0	TRAIN
227	1.41421	3.55348	0.942901	0	3.1324	1	1.97474	3.41421	3	0.973063	4.28069	2.7369	4.67057	1.73891	10.9666	0	0	0	5.69913	83.9964	5.69913	78.2973	2.39505	0	0	0	0	0	0	1.81696	0	0	0	1	TRAIN
228	1.22474	1.57786	2.85312	0	1.92125	3.70044	2.34623	4.80696	8.99801	0.828567	4.88033	3.6959	6.31464	1.89293	11.0589	2.71504	42.6833	0	0	113.727	35.43	120.981	3.24131	0	0	0	0	1	0	2.72867	0	0	1	0	TRAIN
229	2.54951	3.32066	3.15671	4.30954	1.26841	4.14266	2.2539	4.85642	10.4358	0.496727	5.12667	3.69627	7.47679	2.04683	12.9639	0.901489	68.7381	0	4.59238	124.473	46.1756	157.125	3.63157	-1.04998	0	0	0	1	0	2.35433	0	0	1	0	TEST
230	2	4.57143	1.21914	0	3.91556	2.53086	2.53954	4.17009	4	0.845406	4.3914	2.98937	4.70315	1.59872	12.4211	0	0	0	11.6748	89.9721	11.6748	78.2973	2.90209	0	0	0	0	1	0	2.2264	0	0	0	0	TRAIN
231	3.60555	4.79612	4.0266	0	2.3901	2.97494	3.68606	5.24733	10	0.797159	5.25895	3.46645	7.3975	1.92736	16.4152	0.205944	57.5916	90.0684	0	131.977	37.1159	119.325	3.3453	-0.167292	0	0	0	0	0	1.24625	0	1	0	1	TEST
232	3.74166	3.20989	4.99025	5.94198	1.12745	3.38367	2.17221	5.86996	11.5457	0.408273	5.72178	3.8165	6.2879	1.87015	26.5882	1.09925	0	117.446	0	284.926	89.1823	238.427	4.39051	0	0	0	0	1	0	5.14903	0	0	1	0	TRAIN
233	3.16228	4.3696	2.00293	3.89182	0.990909	3.57545	1.97174	5.11501	11.0296	0.328953	5.10589	3.42465	4.77213	1.46748	14.4415	1.26112	0	0.284521	48.5861	98.1707	98.1707	60.9589	3.93094	0.971019	0	1	0	0	1	3.38862	0.5	0	1	0	TEST
234	2	0.499788	2.1875	4.89035	1.25738	3.93872	1.65755	5.18265	15.5827	0.638927	4.71766	3.72242	4.6551	1.53103	5.84408	1.49041	21.9998	0	5.06906	5.06906	5.06906	21.9998	3.77785	0	0	0	0	0	0	1.62166	0	0	1	0	TRAIN
235	4	0.731395	2.87924	6.45677	1.19981	4.20841	1.75454	6.08113	18.3103	0.577736	5.77292	4.0382	5.10983	1.82523	28.8527	1.93616	10.9999	0	0	234.892	0	245.892	4.83025	0	0	0	0	1	0	4.59667	0	0	1	0	TEST
236	1	0.716219	1.40741	0	2.36433	2.25163	1.91555	4.56155	5.34722	0.892921	4.03921	3.34984	4.67346	1.5993	3.30907	0	21.9998	0	9.18477	9.18477	9.18477	21.9998	3.42433	0	0	0	0	0	0	-0.472828	0	0	0	0	TRAIN
237	3.60555	4.87505	1.94474	4.95119	1.32133	3.8404	2.62226	5.30155	12.867	0.535268	5.74906	3.75511	5.18923	1.68073	26.2947	0.596804	42.2883	47.035	26.8352	221.464	92.3583	196.156	3.4997	0	0	1	0	1	0	3.213	0	1	1	0	TRAIN
238	2.82843	2.52582	3.53194	0	3.08241	2.8559	3.35488	4.69353	7	0.561511	4.11004	3.23405	7.42943	1.7527	4.84617	0	29.8496	0	33.8113	35.3917	35.3917	25.1449	3.66275	0.162037	0	1	0	0	0	0.967325	0	0	0	1	TRAIN
239	3.4641	3.85962	4.0038	0	2.41049	3.46347	3.68489	4.78165	10	0.418256	4.49525	3.33761	7.45172	2.06741	6.42696	1.06975	54.9945	4.27582	73.6274	31.6999	31.6999	83.187	3.76061	-1.05148	0	1	0	0	1	0.381476	0	0	0	0	TRAIN
240	2.23607	5.88312	2.08625	0	1.72971	2.6757	2.44747	3.80194	6	0.483054	3.8699	2.7946	6.26949	2.17602	4.80069	0.927155	10.9999	0	9.18477	9.18477	9.18477	96.3666	2.42147	0	0	0	0	0	0	-0.916608	0	0	0	1	TRAIN
241	2.44949	2.34604	2.89306	0	2.93297	2.6416	2.9923	4.41421	6	0.593412	3.9527	3.05745	7.43765	1.80753	4.27104	0	47.9114	0	24.9861	32.8571	32.8571	25.1449	3.14469	0	0	1	0	0	0	0.589611	0	0	0	0	TRAIN
242	3.4641	6.49239	3.63495	1.60944	1.72023	3.02206	3.26737	4.4676	11	0.382339	4.62178	3.38022	7.43856	2.06452	6.61814	0.424789	64.6725	0	26.8352	60.1703	60.1703	72.2896	3.60458	-1.07305	0	0	0	0	0	1.02427	0	0	0	0	TRAIN
243	3.16228	3.36777	3.41068	6.29964	0.93194	3.58418	1.95766	5.10034	11.3095	0.364047	5.18646	3.7831	6.31496	1.81969	9.20693	0.358701	85.3667	0	22.7195	111.272	111.272	85.3667	3.2577	2.5522	0	0	0	0	0	3.95611	0	0	1	1	TEST
244	2.82843	2.82285	1.31509	0	3.08241	2.84644	3.35488	4.69353	7	0.581476	4.43618	3.29114	5.00758	1.54164	8.87306	0	0	0.284521	57.8833	67.3384	67.3384	78.0892	3.83833	0.49537	0	1	0	0	1	0.589611	0	0	0	1	TRAIN
245	3.87298	2.77617	4.11094	0	2.87445	4.08496	4.19034	5.50535	11	0.416687	4.59909	3.45564	8.35372	2.68324	7.77182	1.23598	68.7381	11.7711	72.9691	16.1994	16.1994	163.543	4.15852	-1.68894	0	1	0	0	1	0.0829355	0	0	0	0	TEST
246	2.44949	3.87111	2.05676	4.90017	0.621166	3.77356	1.33886	4.70776	8.00961	0.38762	4.9773	3.61209	4.78267	1.62272	7.78207	1.1188	21.9998	0	18.3695	66.7614	66.7614	43.9996	3.18212	0	0	0	0	0	0	0.737368	0	0	1	1	TRAIN
247	2.12132	2.22061	4.55768	4.27667	1.08979	4.69613	2.02539	5.10037	11.6529	0.406301	4.98693	3.48184	7.42877	2.15267	8.85342	0.992602	36.1448	41.4882	72.4947	7.85179	7.85179	213.878	3.80929	-0.592284	0	1	0	0	1	-1.45309	1	0	1	0	TRAIN
248	2.44949	2.24553	4.92956	6.22567	0.768904	4.6645	1.60215	5.09672	13.5095	0.43571	5.42395	3.7914	7.81491	2.09654	9.83353	0.952264	47.8603	13.1295	18.9403	101.07	101.07	75.8918	3.78561	-0.184812	2	1	0	0	1	2.36496	0.4	1	1	1	TRAIN
249	1.22474	1.38153	2.67694	0	1.78218	3.52164	2.12502	4.49889	8.14633	0.714549	4.24248	3.20225	7.52937	1.91752	3.86425	3.74643	36.5922	19.1611	12.3142	25.6506	25.6506	55.7533	4.26886	0	3	1	1	0	1	0.0671022	1	1	1	1	TRAIN
250	1.22474	1.17119	3.80357	4.87472	1.3647	3.93214	1.93232	4.90997	13.9763	0.66098	4.63274	3.66532	7.43114	1.92259	4.59523	1.20814	32.3363	0	5.06906	58.5944	58.5944	36.1448	3.73384	-0.121574	0	0	0	0	0	1.95872	0	0	1	1	TEST
251	1.87083	1.5227	1.7632	4.84419	1.14205	4.05351	1.83763	4.87898	12.1682	0.554056	4.64792	3.69821	4.89668	1.60623	5.84408	1.24141	0	23.5422	20.5445	62.6457	62.6457	21.9998	3.31375	0	0	0	0	0	0	2.21447	0	0	1	1	TRAIN
252	2	0.992554	3.64931	0	2.48266	2.90564	2.58339	5.33027	8.55568	0.719044	4.43175	3.52108	7.45124	2.17108	4.50943	0	54.9945	6.7625	35.6612	29.1176	29.1176	61.2897	4.18006	-1.04398	0	1	0	0	0	-0.741459	0	0	0	0	TRAIN
253	3.74166	5.02756	3.81876	0	2.20488	3.4906	3.72001	5.24771	11	0.679751	5.34058	3.55854	7.42699	1.82547	17.4935	0.598612	51.0755	0	18.9104	113.115	105.733	80.1475	3.9839	-0.0802546	0	1	0	0	0	-0.755459	0	1	0	0	TRAIN
254	2.34521	3.23025	3.58227	2.56495	1.4559	4.07488	2.33526	4.7893	10.1247	0.480359	4.57641	3.26774	7.43466	1.73925	7.10459	0.415007	54.336	23.5422	29.0101	36.9206	36.9206	58.1446	3.68349	-0.318241	0	0	0	0	0	0.83646	0	0	1	1	TRAIN
255	2.54951	3.51588	1.82556	6.12201	0.784176	4.29465	1.75304	4.90868	11.7784	0.355494	5.14989	3.73479	4.82315	1.64776	8.47455	0.785772	0	0	0	126.667	126.667	54.897	3.10852	0	0	1	0	0	1	2.90753	0	0	1	1	TRAIN
256	3	3.43872	3.37425	6.91616	0.821639	3.80776	1.89499	5.0312	12.9064	0.347787	5.37615	3.81927	7.50713	1.91514	8.00363	1.09987	86.1639	0	33.5711	136.869	136.869	105.861	3.23956	0	0	1	0	0	1	2.20496	0	0	1	1	TRAIN
257	2.34521	1.73594	4.87601	6.42213	1.00853	4.07782	1.81803	5.28298	17.7347	0.483852	5.1227	3.86719	7.43259	1.77679	8.05729	1.47149	32.3363	0	7.6036	80.8005	80.8005	58.1446	3.80003	1.63614	0	0	0	0	0	2.17648	0	0	1	0	TRAIN
258	2.44949	1.74893	4.86559	6.61179	0.990596	4.19582	1.83534	5.30827	18.0873	0.466422	5.21295	3.89167	7.4451	1.95591	7.81035	1.23394	62.6147	0	5.06906	83.3995	83.3995	83.2895	3.89371	0.134766	0	0	0	0	0	1.5743	0	0	1	0	TEST
259	2.44949	1.74893	4.86559	6.61179	0.990596	4.19582	1.83534	5.30827	18.0873	0.466422	5.21295	3.89167	7.4451	1.95591	7.81035	1.23394	62.6147	0	5.06906	83.3995	83.3995	83.2895	3.89371	0.134766	0	0	0	0	0	1.5743	0	0	1	0	TRAIN
260	3.08221	2.32	6.36186	7.64798	0.682434	4.65752	1.49829	5.43228	23.8091	0.377047	5.6038	3.97156	7.42731	1.84113	11.0338	1.16357	83.9616	23.5422	0	119.122	119.122	133.828	3.84678	-0.443798	0	0	0	0	0	0.688715	0	0	1	1	TEST
261	3.87298	6.6055	3.50749	1.94591	1.8044	3.70805	3.49891	5.245	12	0.518706	5.37068	3.54814	7.43041	1.77031	18.4925	0.543105	51.0755	0	29.8414	115.65	108.267	80.1475	3.78401	-0.038208	0	1	0	0	0	-0.377745	0	1	0	0	TRAIN
262	2.54951	3.23223	1.18341	5.91957	0.713964	3.61673	1.60658	4.78794	10.3894	0.385311	5.04919	3.66076	4.95133	1.57182	7.18904	0.458428	0	33.326	0	110.349	110.349	33.326	2.99018	0	1	1	1	0	1	3.214	0.365148	0	1	1	TRAIN
263	3.87298	2.9003	4.7646	5.074	1.43007	3.46772	2.72589	5.15461	13.5969	0.390062	5.16514	3.75171	7.53505	2.22371	7.10798	0.953611	110.446	38.3222	6.00358	70.4782	70.4782	139.359	3.76709	-1.48472	4	1	1	0	1	1.21119	1.63299	1	1	0	TRAIN
264	2.23607	3.15584	2.9213	0	3.13516	2.19969	2.75418	4.30278	5	1.24908	4.4737	3.17444	7.38793	2.15094	7.56356	0	34.1065	0	0	50.4603	21.7661	34.1065	2.44726	0	0	0	0	0	0	-0.816018	0	1	0	1	TEST
265	2.91548	2.28713	4.73167	1.60944	1.73365	3.18083	2.51018	5.41885	9.57203	0.694812	4.97805	3.49005	7.39291	1.83609	11.0505	0.129219	58.8447	0	13.3962	48.9007	35.1623	45.1064	3.51531	0	0	1	0	0	0	0.174051	0	1	1	1	TRAIN
266	2.34521	2.21443	3.45044	6.25365	0.988391	3.70347	1.88414	4.93209	10.859	0.494683	5.13767	3.77298	7.81538	2.02174	6.14321	0.948566	33.5711	5.44882	28.1839	64.3894	64.3894	93.8253	3.78212	0	2	1	0	0	1	2.01297	0.4	1	1	1	TRAIN
267	2.12132	1.12898	3.17981	0	2.0137	3.41042	2.48648	4.95211	8.89096	0.760938	4.68921	3.72001	7.815	2.20381	4.55627	4.19131	30.8846	0	24.4276	30.9248	30.9248	67.5324	3.8097	0	2	1	0	0	1	0.836877	0.816497	1	0	1	TEST
268	3	2.48906	4.02572	4.27493	1.24185	2.85539	2.30579	4.87564	10.5166	0.441344	4.87667	3.70209	7.43509	2.08132	6.27549	0.370771	64.6725	0	0	80.4249	80.4249	72.2896	3.66552	-0.858489	0	0	0	0	0	2.00459	0	0	1	0	TEST
269	2.44949	2.63636	3.06944	0	3.97067	2.42258	2.9935	4.56155	5	0.73946	3.88942	3.20957	7.42971	1.89229	3.68955	0	29.8496	0	11.9495	30.3226	30.3226	25.1449	3.63413	0.0925926	0	1	0	0	0	0.180172	0	0	0	0	TRAIN
270	3.4641	4.10843	3.44575	6.29342	0.641455	4.32485	1.59098	4.72759	10.7392	0.335057	5.33967	3.7104	7.81538	1.95079	7.78748	1.8205	58.7357	5.44882	34.541	83.3963	83.3963	119.873	3.7814	0	3	1	1	0	1	2.54945	1.1501	1	0	1	TEST
271	1.87083	1.54232	0.0833333	0	1.76418	2.90869	2.22836	4.73205	8.47908	0.67422	4.34371	3.56616	4.51388	1.47487	4.3465	0.25076	0	0	0	66.9307	66.9307	0	2.96385	0	0	1	0	0	1	2.19267	0	0	1	1	TEST
272	2.12132	1.20317	3.94389	0	2.09903	2.90531	2.67445	5.49949	10.3681	0.585887	4.6485	3.5956	7.46067	2.35966	5.20428	3.68594	84.8441	4.27582	53.6719	31.3355	31.3355	75.4348	4.27612	-1.87794	0	1	0	0	0	-0.842142	0	0	1	0	TEST
273	4.12311	14.8446	4.27654	2.19722	1.1773	3.26152	2.98998	5.09808	15	0.203789	4.66444	3.12258	7.23775	1.49778	9.58811	0.760336	0	0	36.2762	53.069	53.069	26.8361	3.46098	0	1	1	0	0	1	1.16155	0	1	0	0	TRAIN
274	2	3.63636	2.43056	0	3.91556	1.82707	2.53954	4.17009	4	0.82045	3.68877	2.99253	7.43794	2.08346	3.09695	0	47.9114	0	3.12431	27.7881	27.7881	25.1449	3.07513	0	0	1	0	0	0	-0.272911	0	0	0	0	TRAIN
275	1.73205	3.30008	0.944444	0	0	1.6604	2.32379	4	3	0.917073	3.32088	2.75022	4.68136	1.36331	2.68986	0	0	0	3.00179	16.7928	16.7928	32.7747	2.27797	0	0	1	1	0	0	-0.241238	0	0	0	0	TEST
276	3	2.87905	3.47126	6.13489	0.849407	4.0323	1.77524	4.85043	10.3102	0.44015	5.32627	3.78822	7.81538	1.94529	10.3634	0.683184	34.6738	17.2199	11.2793	88.3983	88.3983	77.0398	3.78211	0	2	1	1	0	1	2.11635	1.24958	1	0	1	TRAIN
277	2.44949	2.53247	2.43056	0	3.97067	1.6604	2.9935	4.56155	5	0.912266	4.11193	3.26165	7.81573	2.51294	3.62339	0	0	0	3.00179	16.7928	16.7928	50.7469	3.70492	0	3	1	1	0	0	0.213152	0	1	0	1	TRAIN
278	2	4.02597	1.06327	0	3.91556	1.82707	2.53954	4.17009	4	0.927641	4.12481	3.25555	4.76274	1.47295	8.02391	0	0	11.7711	17.6504	69.7759	30.6273	39.1486	2.73836	1.14506	0	0	0	1	0	2.0814	0	0	0	1	TRAIN
279	4.58258	4.37734	4.29476	6.17956	1.62795	3.75674	3.11216	5.44651	15.8814	0.446712	5.68628	3.88043	7.81943	2.53078	13.3007	1.05578	44.313	0	26.4756	74.3108	74.3108	154.352	5.0545	0	4	1	0	0	1	2.54796	0	1	1	0	TRAIN
280	1.73205	2.33212	3.05635	2.56495	1.4668	3.05898	2.26659	4.51004	10.8426	0.498556	4.53024	3.15334	7.53097	2.02222	5.8019	3.32177	50.7469	38.3222	16.9609	10.9573	10.9573	89.0691	2.99361	0	4	1	1	0	1	-0.27108	2	1	0	1	TRAIN
281	2.73861	1.7482	3.37954	4.96109	1.69603	3.15557	2.5999	5.1023	11.1734	0.59207	4.99137	3.80005	7.81909	2.57987	4.75661	1.17537	0	0	8.8252	45.953	45.953	101.494	3.85971	0	4	1	0	0	1	2.23912	0	1	1	1	TRAIN
282	0	1.28167	1.44444	0	2.05599	1.37878	2	4	7.5	0.791327	3.76099	2.91376	4.50267	1.52013	3.76077	0	21.9998	0	18.3695	18.3695	18.3695	21.9998	2.6226	0	0	0	0	0	0	-0.472828	0	0	1	1	TRAIN
283	4.79583	8.55667	2.35971	4.00733	1.21684	3.38347	2.78974	5.3288	16.6241	0.472479	6.01022	3.6169	4.92406	1.57532	35.7459	1.23004	64.4516	23.5422	62.8551	217.552	202.787	132.005	4.45877	0	0	0	0	0	0	-0.44952	0	1	1	0	TRAIN
284	3.4641	7.91711	3.36935	1.38629	1.64106	3.48615	3.28301	4.47371	12	0.297978	4.51037	3.0623	7.52898	1.58953	7.77387	1.69442	25.3735	19.1611	40.0708	37.069	37.069	44.5346	2.90693	0	2	1	1	0	1	2.65688	1	1	0	1	TRAIN
285	2.23607	2.79737	1.78567	6.61364	0.834199	3.27368	1.67575	5.13952	10.9778	0.41194	5.23047	3.7388	4.80664	1.67346	7.78012	0.645727	0	0	3.12431	143.694	143.694	32.8972	3.38167	0	0	1	0	0	1	4.33895	0	0	1	0	TRAIN
286	2.23607	1.78298	5.31311	6.22121	1.03519	3.55066	1.84913	5.68982	11.2645	0.439637	5.20948	3.79611	7.44787	1.96714	7.12108	1.51549	54.9945	4.27582	36.0215	110.114	110.114	50.2899	4.39733	-0.826291	0	1	0	0	1	1.79477	0	0	1	0	TEST
287	2.82843	7.22494	0.98338	0	2.12495	2.52164	2.92782	4.34292	7	0.574707	4.76142	3.26244	5.07466	1.63672	10.5656	1.77509	0	0.569043	101.571	90.9531	90.9531	156.178	3.76202	0.218148	0	1	1	0	1	-1.32531	0	0	0	0	TRAIN
288	2.44949	3.1039	0.900463	0	3.97067	1.92193	2.9935	4.56155	5	0.846431	4.62912	3.46027	5.19283	1.72183	8.99073	0	1.4267	0	65.7944	91.8108	91.8108	156.178	4.01714	0.203704	0	1	0	0	0	-1.3057	0	0	0	0	TRAIN
289	4.69042	9.08794	4.90274	4.02535	0.697314	4.38542	2.08255	5.02592	16.7089	0.167331	5.35096	3.6349	7.43549	1.99718	15.6824	0.916516	121.541	0	41.2974	58.8657	58.8657	200.34	3.88618	-2.24231	0	0	0	0	0	1.58817	0	0	0	0	TRAIN
290	2.91548	2.88333	3.41862	4.52315	1.26487	4.32386	2.32613	4.86202	10.703	0.411815	4.84758	3.68931	7.47707	2.27315	6.75237	1.34379	154.105	0	35.4317	35.0587	35.0587	186.092	3.73483	-1.09948	0	1	0	0	1	-2.02755	0	0	1	0	TRAIN
291	2.54951	3.12867	6.23681	6.80441	0.919766	5.09003	1.88982	5.21884	17.6682	0.37399	5.5262	3.84674	8.20071	2.13347	14.1662	1.17725	32.6063	26.7312	22.0155	136.799	97.6504	181.406	3.91249	-0.564026	0	1	0	1	1	2.92609	0.333333	0	1	0	TRAIN
292	2.44949	1.5409	4.99624	7.53859	0.927131	3.6645	1.74614	5.47117	22.075	0.481103	5.43549	4.00774	7.43537	2.31905	5.62848	0.987308	235.406	0	0	56.5643	56.5643	243.023	3.86641	-1.88176	0	0	0	0	0	0.341543	0	0	1	0	TEST
293	3.60555	1.00847	2.71305	6.07074	1.12744	3.866	1.75806	5.99756	16.6649	0.52961	5.77387	3.98806	5.16761	1.81939	28.8527	2.13988	18.0011	0	2.53453	244.428	9.53574	245.892	4.79965	0.642284	0	0	0	1	0	4.45167	0	0	1	0	TRAIN
294	1.22474	1.18865	1.22569	0	2.98277	2.92193	1.99894	4.17009	4.41393	0.967612	4.1671	3.16784	4.67186	1.71117	7.58688	0	10.9999	0	7.44195	46.5906	7.44195	50.1485	3.14803	0	0	0	0	1	0	0.407962	0	0	0	1	TRAIN
295	1.22474	0.970875	1.35764	0	2.98277	3.02699	1.99894	4.17009	4.41393	0.846424	3.69013	3.16421	4.53993	1.44333	3.05749	0	10.9999	0	15.9521	15.9521	15.9521	10.9999	3.09608	0	0	0	0	0	0	0.407962	0	0	0	1	TRAIN
296	1.87083	2.09319	2.07712	7.22348	0.795583	4.60141	1.56974	5.19276	17.5917	0.440576	5.45324	3.86536	5.06292	1.72623	11.4098	1.01811	58.8004	0	31.7368	143.396	104.247	89.2602	3.41833	0.929259	1	1	1	1	1	4.50177	1.31037	0	1	0	TRAIN
297	5.70088	9.45829	6.23465	7.00797	0.259586	5.27669	0.918418	5.60055	16.7264	0.135068	6.27817	3.77433	7.43307	1.71636	44.7397	1.2671	64.6725	0	48.9225	347.638	191.043	228.884	3.81193	-0.419172	0	1	0	0	1	7.27961	0	0	1	0	TRAIN
298	3.16228	1.79661	4.90721	6.20323	0.766035	5.07237	1.57851	5.84484	20.8972	0.347306	5.2592	3.78101	6.31294	1.79841	10.4749	0.845833	42.6833	52.1229	24.0324	99.1841	99.1841	108.688	4.2173	0	0	0	0	0	0	4.00417	0	0	1	1	TRAIN
299	3.16228	5.48185	3.15921	0	1.884	3.969	3.1296	4.64423	9	0.439463	4.57686	3.25588	7.47706	2.04991	10.0974	0.579113	68.7381	0	46.0563	46.2885	46.2885	100.725	4.19829	-0.90583	0	1	0	0	0	-1.67746	0	0	0	1	TRAIN
300	2.64575	3.33678	3.45921	4.48582	1.1513	3.97366	2.14713	4.68655	10.0107	0.451015	4.74406	3.61494	7.44035	1.82155	6.34791	0.889834	25.1449	4.27582	64.3255	63.5986	63.5986	69.042	3.48679	-0.565593	0	1	0	0	1	0.97511	0	0	1	1	TEST
301	2.64575	2.3642	2.01724	5.8212	1.08131	4.30015	1.98286	5.32497	14.6719	0.453846	4.93253	3.79518	4.73405	1.45881	7.91309	1.06101	18.0108	0	39.8932	92.1695	92.1695	10.9999	3.59268	1.30584	0	1	0	0	1	2.826	0	0	1	0	TRAIN
302	2.44949	3.20034	3.07153	0	2.45966	3.32323	2.83182	4.3342	6	0.617143	4.06968	3.24515	7.43323	2.00641	3.97217	0.0413423	32.3363	0	13.4176	45.8521	45.8521	51.9117	3.56241	-0.358796	0	0	0	0	0	0.888152	0	0	0	1	TRAIN
303	1	1.96104	1.56944	0	0	2.06717	1.63299	3	2	0.911685	2.94387	2.49239	6.26983	2.06877	2.18152	0	0	0	8.8252	8.8252	8.8252	42.6833	1.51853	0	0	0	0	0	0	-0.172449	0	0	0	1	TEST
304	2.44949	3.40053	3.16181	0	2.45966	3.29277	2.83182	4.3342	6	0.64292	3.99818	3.10584	7.26376	1.85512	4.31073	0.047058	0	16.663	21.8618	21.8618	21.8618	43.4991	2.56442	0	2	1	1	0	0	0.562392	1	1	0	1	TRAIN
305	2.23607	2.57143	2.93056	0	3.13516	2.98523	2.75418	4.30278	5	0.770128	3.88088	3.08474	7.26409	1.96166	3.70662	0	0	16.663	10.9309	19.3273	19.3273	43.4991	2.53528	0	2	1	1	0	0	0.109309	1	1	0	1	TRAIN
306	3	4.45132	3.06681	0	2.17457	3.78418	3.15528	4.64371	8	0.535097	4.51108	3.25975	7.47706	2.13477	9.39789	1.49985	68.7381	0	43.5218	43.754	43.754	100.725	4.22896	-0.920417	0	1	0	0	1	-2.05517	0	0	0	0	TRAIN
307	3.16228	3.78073	2.11448	6.03503	0.884667	3.48418	1.90733	5.10885	11.4248	0.342891	5.38945	3.73801	4.88702	1.64584	19.2012	1.57767	0	11.7711	22.7195	189.569	111.272	78.2973	3.54988	0	0	0	0	1	0	5.85754	0	0	1	0	TEST
308	3	1.93855	4.44704	4.83678	1.026	4.09023	1.87063	5.40768	9.10604	0.417448	4.92846	3.73397	7.4315	1.79353	7.25273	1.38868	43.3361	0	22.2428	80.0009	80.0009	47.1447	4.28022	-0.27421	0	0	0	0	0	1.73083	0	0	1	0	TEST
309	2.82843	2.19358	3.88726	2.30259	1.65306	4.36371	2.6387	5.02263	11.0788	0.458692	4.79357	3.63134	7.43505	2.26271	7.61489	1.27758	91.2629	0	13.4176	25.8523	25.8523	175.195	3.88151	-1.72745	0	0	0	0	0	-1.64262	0	0	0	0	TRAIN
310	1.22474	1.35309	0.162037	0	1.78218	3.19716	2.12502	4.49889	8.14633	0.708021	4.21105	3.55169	4.46568	1.55303	3.72832	0.6375	0	0	11.3597	61.9265	61.9265	0	2.69344	0	0	0	0	0	0	2.94167	0	0	1	1	TRAIN
311	0	0	1	0	0	1.37878	2.25	3	4.5	1.71429	3.25291	2.91076	4.5	1.55556	1.88039	0	10.9999	0	9.18477	9.18477	9.18477	10.9999	2.6226	0	0	0	0	0	0	-0.564449	0	0	0	1	TRAIN
312	0.707107	0.986567	1.03009	0	2.80336	2.4183	2.18411	4.30278	7.02555	0.934507	4.28694	3.26889	4.79092	1.52816	6.86235	0	0	0.284521	40.2329	49.688	49.688	45.192	3.7836	0.787037	0	1	0	0	0	-0.664911	0	0	0	1	TRAIN
313	1.41421	1.09457	1.93042	2.70805	1.19074	3.87966	1.64886	4.82118	8.62379	0.568465	4.46955	3.45268	4.59838	1.50143	5.44016	1.4454	21.9998	0	12.196	12.196	12.196	21.9998	3.47189	0	0	0	0	0	0	1.00107	0	0	1	0	TRAIN
314	2.82843	4.46349	2.75265	0	2.11488	3.66193	3.09225	4.44423	8	0.392604	4.05356	3.06936	6.26649	1.58939	5.54519	0.953318	0	0	27.7885	27.7885	27.7885	42.6833	2.50292	0	0	0	0	0	0	2.27386	0	0	0	0	TRAIN
315	5.2915	15.0915	4.79776	3.21888	1.24422	4.10188	3.69625	4.53368	25	0.160241	5.22864	3.23689	7.43294	1.67024	15.3902	1.60412	64.6725	0	74.9	89.2826	89.2826	72.2896	3.68821	-0.279762	0	0	0	0	0	4.73744	0	0	0	0	TRAIN
316	5	9.03646	5.56978	5.19953	0.932979	4.15016	2.51206	5.07469	18.4209	0.208841	5.39681	3.73581	7.43765	1.72745	15.3398	1.39154	64.6725	0	64.7618	123.421	123.421	72.2896	3.76175	-0.88792	0	0	0	0	0	5.42641	0	0	1	1	TRAIN
317	3.31662	3.77742	3.77417	0	2.17731	3.97057	3.50766	4.75199	10	0.432446	4.51233	3.24304	7.53218	2.22722	6.29657	0.859477	50.5184	23.4369	34.0492	17.3124	17.3124	112.363	3.66767	-0.586528	2	1	1	0	1	-0.69108	1.41421	1	0	1	TRAIN
318	3.60555	4.40522	3.87861	0	2.08896	3.93618	3.60653	4.75821	11	0.402587	4.65626	3.28167	7.53224	2.24862	6.44202	1.1391	80.7968	23.4369	42.8744	31.2711	31.2711	94.8244	3.6912	-0.825924	2	1	1	0	1	-0.410099	1.41421	1	0	1	TEST
319	2.44949	1.85468	2.42056	0	2.93297	3.02206	2.9923	4.41421	6	0.681415	4.17767	3.2109	7.52986	2.22561	3.21739	0	41.5464	19.1611	44.9921	27.1038	27.1038	75.5939	3.96657	0	2	1	1	0	1	0.00601911	1	1	0	1	TEST
320	3.39116	3.27562	4.5732	4.52315	1.34858	4.18523	2.44527	4.97861	10.6333	0.391657	4.89568	3.6173	7.45175	2.02374	7.19847	1.04232	54.9945	4.27582	62.2677	70.907	70.907	83.187	3.82345	-1.1615	0	1	0	0	1	1.35405	0	0	1	0	TRAIN
321	4.24264	3.11688	4.79717	5.9108	0.614878	5.10248	1.4924	5.87352	20.1705	0.263234	5.47382	3.71649	7.4366	1.77224	14.2374	0.884547	64.6725	52.1229	46.7519	114.148	114.148	95.6109	4.29562	1.04873	0	0	0	0	0	4.58432	0	0	1	0	TEST
322	3.39116	2.23809	4.28583	7.0496	0.947169	4.9278	1.84673	5.54251	18.0326	0.404519	5.26417	3.97439	7.47657	1.83721	10.2	1.24408	79.738	4.90088	49.1664	75.5645	75.5645	78.8282	3.98893	-0.820305	0	1	0	0	1	2.12124	0	0	1	0	TRAIN
323	2.12132	2.18235	3.25235	3.99187	1.4487	4.22018	2.33122	4.86577	10.2089	0.521329	4.66184	3.68414	6.31331	1.79483	5.84408	0.948105	42.6833	0	2.53453	75.5185	75.5185	69.4502	3.15163	0	0	0	0	0	0	2.11011	0	0	1	0	TRAIN
324	3.39116	3.82532	2.05283	5.01292	1.26597	4.01808	2.45731	5.27481	11.6433	0.544829	5.5011	3.72534	5.07215	1.60259	19.0123	0.573895	25.5028	0	8.8252	161.229	149.569	61.9242	4.3576	0	0	0	0	0	0	2.49233	0	1	1	0	TEST
325	4.1833	5.78555	5.95107	6.411	0.573971	4.7817	1.53947	5.09987	12.5638	0.245602	5.7141	3.71052	7.43117	1.80999	17.0425	0.951534	48.938	0	48.7098	224.142	184.993	117.353	4.21556	-0.450691	0	1	0	1	1	4.83249	0	0	1	0	TRAIN
326	3.24037	3.14881	6.11247	6.08429	0.818319	4.38158	1.70817	5.50002	10.5813	0.362235	5.38318	3.75045	8.21037	2.0948	8.89781	0.712754	131.219	29.9202	42.2389	88.5421	88.5421	139.501	3.87449	0	2	1	1	0	1	3.48741	2.87443	0	1	1	TEST
327	3.74166	3.61883	4.34076	4.70671	1.25822	3.93027	2.44893	5.31996	11.8713	0.398071	5.00489	3.67768	8.51308	2.53017	8.2343	1.27973	25.1449	4.27582	28.8946	72.6754	72.6754	70.0253	4.46043	-0.472848	0	1	0	0	1	2.51953	0.5	0	1	0	TEST
328	3.53553	2.36041	4.21189	6.93604	0.716253	4.48173	1.56767	5.29375	15.5354	0.366153	5.2847	3.88363	8.51574	2.41088	7.94939	1.25151	29.8496	0	28.3048	96.8315	96.8315	70.0253	4.57546	-1.95096	0	1	0	0	1	3.73566	0	0	1	1	TRAIN
329	2.44949	2.98849	4.76247	6.21897	0.798079	3.9354	1.71279	4.88864	10.6845	0.385967	5.08657	3.75566	8.20091	2.02294	7.15672	0.725361	29.8496	14.9601	26.836	107.589	107.589	40.105	3.53268	-0.0976554	0	1	0	0	1	3.50473	0	0	1	1	TEST
330	3	2.84923	3.34222	0	2.65822	3.50689	3.41009	4.70489	8	0.548448	4.38792	3.22883	8.18534	2.60142	4.73859	1.47632	50.5184	38.397	46.4747	14.8515	14.8515	117.537	3.6209	-1.03921	2	1	1	0	1	-0.548606	1	1	0	1	TRAIN
331	1.22474	1.19162	3.98481	0	1.92125	3.58496	2.34623	4.80696	8.99801	0.708839	4.49015	3.49701	8.20277	2.65602	3.01776	0	64.1155	31.007	36.0215	27.1489	27.1489	65.25	3.74694	-2.69931	0	1	0	0	0	-0.234351	0	0	1	0	TEST
332	4.41588	5.11904	5.49832	7.60721	0.673218	5.24468	1.69623	5.14929	16.0997	0.26694	5.63395	4.01181	8.20091	2.06704	14.1818	0.475522	68.7381	19.861	24.6186	141.358	141.358	168.155	3.61356	-1.11369	0	1	0	0	1	3.34752	0	0	1	1	TRAIN
333	0	1.12532	1	0	0	0	1	2	1	2.06559	2.79865	2.37831	7.50855	2.50855	1.2259	0	66.402	0	0	17.7148	17.7148	42.8597	2.4	0	0	0	0	0	0	-0.959	0	0	0	1	TRAIN
334	2.12132	2.20117	2.99837	5.6145	0.895342	4.39232	1.70538	4.80988	9.30137	0.50457	5.1224	3.74119	7.4388	1.80646	8.35658	0.945008	82.5851	28.991	21.1457	89.3204	89.3204	51.4378	2.96396	0	0	1	1	0	1	0.878331	0	0	0	0	TRAIN
335	2	2.25734	2.78822	3.3322	1.32313	3.80776	2.06354	4.50135	8.18009	0.635771	4.80537	3.6318	7.4388	1.812	7.95656	1.05827	82.5851	11.7711	29.9709	62.0048	62.0048	41.9305	2.91558	0	0	1	1	0	1	0.241808	0	0	0	1	TRAIN
336	2.82843	2.73489	3.42494	6.17781	0.817218	4.43661	1.73693	4.84851	10.2755	0.434261	5.35021	3.78735	7.81539	2.13399	8.2298	0.914789	82.5851	17.2199	26.1657	82.6009	82.6009	102.185	3.78211	0	2	1	1	0	1	1.37091	0.458566	1	0	1	TRAIN
337	2.44949	5.64935	2.42051	0	2.10696	3.4183	2.67826	4.22833	6	0.618455	4.43791	3.19305	7.4388	1.92344	6.81812	2.3034	47.9114	0.284521	68.6736	56.4719	56.4719	103.234	3.72277	0.0482407	0	1	1	0	1	-1.32531	0	0	0	0	TRAIN
338	8	22.2718	6.04785	4.70048	1.85701	5.54539	5.91645	5.02921	49	0.129024	5.99384	3.43812	7.48706	2.24871	29.2491	0.855672	339.625	0	103.681	88.8064	88.8064	504.55	3.83243	-7.98618	0	1	0	0	1	1.21182	0	0	0	1	TRAIN
339	2.54951	2.86286	3.09453	4.12309	1.07548	4.05881	1.93614	4.45744	8.1576	0.507153	4.66034	3.54902	7.44054	1.89062	4.64626	0.507964	45.9634	21.4957	67.4484	49.4641	49.4641	84.2125	3.46026	-0.701105	0	1	1	0	1	-0.664507	0	0	0	0	TRAIN
340	0	0.362534	1.08333	0	3.125	2.28104	2.08333	3.61803	6.81818	1.37163	3.87479	3.39942	4.94769	1.64542	2.23271	0	0	23.5422	0	42.4315	42.4315	9.50735	2	0	0	0	0	0	0	0.155502	0	0	0	1	TRAIN
341	1.22474	0.754515	2.77384	0	2.17206	3.45943	2.13996	4.41421	7.14792	0.923269	4.2488	3.54208	7.43779	2.01349	2.75846	0	48.3402	17.2199	0	47.565	47.565	34.6523	2.98748	0	0	0	0	0	0	-0.144581	0	0	0	1	TRAIN
342	3.67423	3.76576	4.34945	5.94419	0.902207	4.8125	1.95942	5.39488	12.0643	0.386438	5.72094	3.92464	7.72887	2.21024	15.8126	0.782315	131.062	17.2199	2.1057	114.059	74.91	192.089	4.69317	-1.30693	0	1	0	1	1	0.434304	0	1	1	0	TRAIN
343	4.1833	1.72798	5.5072	5.9108	1.00603	5.16598	1.88805	6.16207	17.5018	0.377331	5.42316	3.85378	7.43519	2.13889	12.8279	1.02879	84.6144	0	31.068	56.0546	56.0546	211.34	4.42951	-0.801186	0	0	0	0	0	-0.769578	0	0	1	0	TEST
344	2.23607	1.68365	3.31282	0	1.70474	3.46132	2.53286	5.02067	10.4989	0.589301	4.76289	3.7702	7.47828	2.49927	4.76821	1.26634	196.788	0	0	23.0479	23.0479	195.878	3.59052	-1.29111	0	0	0	0	0	0.0727139	0	0	1	0	TRAIN
345	4.47214	8.74648	3.10754	2.19722	1.45866	3.24053	3.41559	5.17572	15	0.229922	4.69418	3.27245	6.26901	1.60352	9.7583	0.757673	0	0	50.508	50.508	50.508	85.3667	3.20504	0	0	0	0	0	0	3.12155	0	0	0	0	TRAIN
346	3.80789	4.55187	3.94317	4.31707	0.960966	4.29644	2.20941	5.33066	12.4241	0.291866	5.02709	3.68928	7.4771	1.79686	9.61515	1.03482	68.7381	0	44.9623	85.9155	85.9155	78.8282	3.97858	-0.755337	0	0	0	0	0	3.18235	0	0	1	0	TRAIN
347	1.73205	1.16004	1.65992	7.49594	1.07824	4.37366	1.77493	5.08765	17.7381	0.666918	5.07226	3.99451	5.14153	1.72204	5.61438	1.13728	37.0017	14.099	15.6864	66.8659	66.8659	66.4682	3.27938	0	0	1	0	0	1	2.36554	1	0	1	1	TRAIN
348	1.58114	1.05795	1.62186	7.39275	1.09875	4.36852	1.75131	5.03855	17.5302	0.712623	5.01645	3.97096	5.13986	1.76131	4.80498	0.947644	37.0017	14.099	6.86124	64.3313	64.3313	66.4682	3.21261	0	0	1	0	0	1	2.07407	1	0	1	1	TRAIN
349	2.23607	3.20779	2.28472	0	3.13516	3.39275	2.75418	4.30278	5	0.652444	4.18113	2.97942	6.32133	2.28566	8.79399	0	0	0	2.84956	41.9982	2.84956	124.515	2.75039	0	0	0	0	1	0	-0.0808276	0	0	0	0	TRAIN
350	1.22474	0.736364	2.44213	0	2.98277	2.9477	1.99894	4.17009	4.41393	0.967663	3.85458	3.22878	7.43634	2.3297	2.57674	0	59.3401	0	4.59238	16.0165	16.0165	36.1448	3.4101	0	0	0	0	0	0	-1.07091	0	0	0	0	TRAIN
351	1.22474	0.941945	2.08102	0	2.98277	3.0958	1.99894	4.17009	4.41393	0.889242	3.73424	3.15487	6.26754	2.10011	3.13226	0	10.9999	0	4.59238	4.59238	4.59238	53.6832	3.11542	0	0	0	0	0	0	-0.925911	0	0	0	1	TEST
352	2	3.5974	2.24306	0	3.91556	2.92193	2.53954	4.17009	4	0.799334	3.73959	3.1016	7.47701	2.39732	3.0376	0	68.7381	0	35.0029	3.01558	3.01558	100.725	3.59759	-0.967593	0	1	0	0	0	-3.43702	0	0	0	1	TEST
353	4.89898	2.9445	7.20235	6.41836	0.653979	4.87051	1.55256	6.04165	26.8339	0.25777	5.6389	3.84755	7.47708	1.77533	18.2189	0.886181	99.0165	0	84.5872	103.292	103.292	135.657	4.21652	0.861306	0	0	0	0	0	5.0624	0	0	1	0	TRAIN
354	2.73861	1.8057	4.88876	7.00667	0.820844	4.5934	1.633	5.54259	21.7764	0.410144	5.34898	3.90219	6.39574	2.12306	9.1487	0.884916	170.733	0	7.12692	59.8321	59.8321	224.417	3.94106	0	0	0	0	0	0	0.495871	0	0	1	1	TRAIN
355	3.39116	1.14523	2.46113	5.43372	1.56382	4.27761	2.21627	5.99417	15.8229	0.57503	5.77645	3.97416	5.17085	1.84062	27.1087	2.36537	7.00121	0	0	299.994	25.9537	274.041	4.80304	0.424938	0	0	0	1	0	5.12364	0	0	1	0	TRAIN
356	0	2.78149	0.887222	0	1.4877	2.8927	2	4	10.1511	0.521697	3.94585	2.97898	3.75701	1.26106	4.60215	0	0	0	34.8948	16.8841	16.8841	0	2.14082	0	0	1	0	0	1	1.54834	0	0	0	0	TEST
357	2.44949	7.16261	1.31074	0	1.57427	3.51327	2.53006	3.84776	7	0.364733	3.89203	2.89844	4.46929	1.40409	4.79748	1.03265	0	0	56.5008	23.6036	23.6036	32.8972	1.86846	0	0	1	0	0	1	1.94034	0	0	0	0	TRAIN
358	1.73205	1.9107	1.55765	0	2.04414	1	2.76025	5.23607	11.1581	0.798348	5.55425	3.88956	5.22265	1.78345	11.4274	0	0	0	0	255.896	21.0036	234.892	3.79206	0	0	0	0	1	0	5.20677	0	0	1	1	TRAIN
359	3.4641	3.9794	1.3071	0	2.90713	1.92193	3.81399	4.94741	9	0.741076	5.45683	3.65336	5.22656	1.72416	9.14192	0	7.00121	156.595	0	249.524	14.6325	234.892	3.60378	-0.480617	0	0	0	1	0	3.65899	0	0	0	1	TRAIN
360	1.73205	2.22354	1.77006	0	2.04414	1.58496	2.76025	5.23607	11.1581	0.569647	5.45937	3.509	4.89797	1.83298	25.7423	0	0	0	0	234.892	0	234.892	3.79206	0	0	0	0	1	0	4.09196	0	0	1	1	TRAIN
361	2.23607	1.49101	1.56404	0	2.49679	2.55034	2.86673	5.47543	10.0424	0.810266	5.51022	3.86214	5.23228	1.78249	10.3885	0	14.0024	0	0	248.894	14.0024	234.892	4.45095	0.279321	0	0	0	1	0	3.55846	0	0	0	0	TRAIN
362	3.4641	3.48069	1.03318	0	4.97561	0.311278	4.02039	5.64575	7	0.977406	5.36267	3.50778	5.30606	1.56559	5.7137	0	0	234.892	0	234.892	0	234.892	4.24382	0	0	0	0	0	0	3.29086	0	0	0	1	TEST
363	2.44949	3.37733	4.01881	6.13489	1.04318	3.79192	2.13408	5.22079	14.1401	0.397857	5.84085	3.88455	6.3181	1.92937	26.356	0.937664	85.3667	0	2.53453	283.754	48.8618	320.259	3.63629	0	0	0	0	1	0	4.80425	0	0	1	0	TRAIN
364	1.41421	0.74071	0.46875	3.61092	1.58336	1.43537	1.89737	5	13.4412	0.734472	4.37926	3.33797	4.21855	1.39396	5.33184	0	0	141.253	22.5585	10.0613	10.0613	0	3.4	0	0	1	0	0	0	1.10671	0	0	1	0	TRAIN
365	3.24037	2.92723	1.31778	4.12309	1.53992	1.86763	2.64081	5	11.9846	0.496702	4.86842	3.62432	5.05165	1.42281	7.99776	2.90791	50.3566	5.69728	5.69728	56.0755	56.0755	50.3566	3.19264	0	0	1	0	0	0	2.22385	3.57165	0	1	1	TRAIN
366	3.87298	2.03076	5.09028	0	3.91456	1.57097	4.52709	5.60168	10	0.863008	4.91682	3.58479	7.3845	1.65361	10.9535	0	28.3514	0	0	58.4664	50.3783	20.2632	3.68773	0	0	1	0	0	0	1.35371	0	1	0	1	TRAIN
367	2.64575	6.85205	3.09635	0	1.81211	3.6897	2.71584	4.23321	7	0.411292	4.07397	3.14206	7.43745	1.90599	4.84617	1.48953	29.8496	0	51.8605	23.668	23.668	58.0421	3.51417	-0.181991	0	1	0	0	1	0.967325	0	0	0	0	TEST
368	2.91548	3.8272	3.79758	4.26312	1.0513	4.1555	2.27656	5.13552	12.6509	0.330304	4.92257	3.81036	6.31212	1.58005	9.27017	0.653042	42.6833	0	50.0313	74.3077	74.3077	53.6832	3.38178	0	0	0	0	0	0	3.5645	0	0	1	0	TRAIN
369	3.4641	5.53984	3.44866	1.79176	1.7723	3.98619	3.31972	4.70752	11	0.341934	4.55947	3.23431	7.53268	2.01773	7.03066	1.18043	50.5184	23.4369	56.968	25.3449	25.3449	102.577	3.61987	-0.77639	2	1	1	0	1	0.811812	1	1	0	1	TEST
370	2.54951	3.82597	3.48787	3.97793	1.05488	4.35141	2.10974	4.85287	10.7295	0.352214	4.72979	3.68351	6.34096	1.8494	7.49763	0.937572	85.3667	0	21.4979	53.1122	53.1122	85.3667	3.08645	0	0	0	0	0	0	2.77298	0	0	1	0	TRAIN
371	1.73205	2.04683	1.58598	5.83691	0.978956	4.08496	1.78987	4.85482	9.95983	0.511443	5.0878	3.76642	4.91109	1.68664	9.34997	0.962517	34.6738	11.7711	3.25749	86.0316	86.0316	82.4574	2.95066	0	0	1	1	0	1	1.5772	0	0	1	1	TEST
372	2.44949	2.04012	3.36862	6.04308	0.955543	4.20184	1.81315	4.84793	9.86177	0.517125	5.25174	3.78715	7.81538	2.043	8.04241	0.895455	34.6738	17.2199	8.27749	71.6056	71.6056	109.814	3.78211	0	2	1	1	0	1	1.46562	0.338062	1	0	1	TRAIN
373	2.44949	2.36797	3.46463	6.14036	0.873782	4.08496	1.76742	4.89177	10.28	0.450594	5.27483	3.78614	7.81491	2.02717	9.05255	0.733912	34.6738	11.7711	3.25749	86.0316	86.0316	100.307	3.77816	0	2	1	1	0	1	2.11558	0.288675	1	1	1	TRAIN
374	1.58114	1.80388	1.28139	5.6418	1.04889	3.87966	1.80069	4.83345	9.78416	0.557018	5.02764	3.74911	4.8979	1.66396	8.74633	1.26936	34.6738	11.7711	3.25749	92.7511	92.7511	49.5602	2.93793	0	0	1	1	0	1	2.11703	0	0	1	0	TRAIN
375	1.73205	2.68222	0.610926	5.02962	0.797212	2.87314	1.59866	4.59942	9.78267	0.435346	4.838	3.57586	4.58709	1.60257	5.75312	0.645361	35.7765	0	0	100.276	100.276	0	2.7242	0	0	1	1	0	1	3.32619	0	0	1	1	TRAIN
376	3	3.00391	2.91435	0	4.65633	1.40564	3.5412	5.2618	6	0.827673	4.69999	3.26394	8.51264	2.74114	6.67256	0	0	11.7711	7.75952	86.0568	7.75952	123.178	4.37735	0	0	0	0	0	0	2.4187	0	0	0	1	TRAIN
377	3.31662	2.30465	4.63365	5.95154	1.24319	4.32386	2.17657	5.49646	15.4326	0.694639	5.82596	3.98505	7.7301	2.40345	16.6228	0.373719	106.637	23.5422	18.0819	80.7517	41.6031	159.066	4.75465	0	0	1	0	1	1	-0.547072	0	1	1	0	TRAIN
378	4	2.23889	5.36157	5.86363	0.78238	5.35182	1.67657	5.91306	21.9068	0.303213	5.38941	3.75594	7.42925	2.03098	13.8168	1.08084	60.5568	0	35.3921	58.3209	58.3209	178.34	4.30348	0.852974	0	0	0	0	0	1.61825	0	0	1	0	TRAIN
379	2.44949	2.78313	3.89807	6.23398	0.88608	4.29807	1.81	4.96935	11.0312	0.406371	5.07548	3.77395	7.4305	1.91841	7.06467	1.58378	72.5329	0	26.836	98.4677	98.4677	67.8283	3.54162	-0.201147	0	1	0	0	1	2.54	0	0	1	0	TEST
380	2.91548	1.77605	4.13853	6.93768	0.827002	4.54275	1.64266	5.06809	16.1282	0.430114	5.15491	3.88691	7.43186	1.91907	7.19658	0.964369	29.8496	0	11.3597	97.8972	97.8972	67.9506	4.27379	-0.383832	1	1	0	0	1	3.34014	0	1	1	1	TEST
381	1.41421	1.84242	3.43641	5.90127	1.0503	4.02347	1.85024	4.94302	10.6023	0.505039	4.88004	3.77087	6.31431	1.84563	5.69754	1.32692	42.6833	0	0	84.9379	84.9379	75.5805	3.03428	0	0	1	0	0	1	3.02519	0	0	1	0	TRAIN
382	1.87083	1.26504	5.16213	6.69514	1.09736	3.83327	1.86335	5.35173	19.084	0.508533	5.15507	3.92799	7.43544	2.17911	5.43899	1.28782	103.24	0	0	89.343	89.343	92.9732	3.79783	-0.514444	0	0	0	0	0	2.83546	0	0	1	1	TRAIN
383	3.08221	3.17122	4.71828	5.53339	0.729124	4.63162	1.6908	4.89089	10.8602	0.350797	5.23634	3.68971	7.81539	2.22335	8.30781	0.900493	45.9634	9.72464	34.1262	49.0617	49.0617	144.746	3.80114	-0.313559	3	1	1	0	1	0.396402	1.21644	1	0	1	TRAIN
384	3.31662	3.77742	3.77417	0	2.33576	3.97057	3.61109	4.75972	10	0.446025	4.51227	3.2443	7.53218	2.23529	6.29657	1.13207	50.5184	23.4369	34.0492	17.3124	17.3124	112.363	3.66879	-0.586528	2	1	1	0	1	-0.69108	1.41421	1	0	1	TRAIN
385	3	2.87021	3.06375	0	2.65822	3.625	3.41009	4.70489	8	0.544722	4.36604	3.22919	7.53269	2.37247	4.7764	1.51833	50.5184	23.4369	38.0047	6.38153	6.38153	145.26	3.62022	-0.959213	2	1	1	0	1	-1.5536	1	1	0	1	TRAIN
386	3	3.08288	3.80127	7.36014	0.734205	4.85217	1.62456	5.11605	14.2809	0.414146	5.54613	3.90876	7.8149	2.02023	11.5735	0.569365	51.5818	3.68632	5.17942	101.902	101.902	127.001	3.78213	0	2	1	0	0	1	2.87341	0.536342	1	1	1	TRAIN
387	3.16228	3.77113	3.20916	0	2.27611	3.82687	3.39779	4.70703	9	0.460454	4.44186	3.23227	7.53268	2.33284	5.5682	1.07369	50.5184	23.4369	40.5392	8.91606	8.91606	145.26	3.6199	-0.899583	2	1	1	0	1	-1.10052	1	1	0	1	TEST
388	1.22474	0.974353	3.3087	6.01875	1.47588	4.05881	1.99318	5.00323	14.3087	0.766256	4.70334	3.84944	6.31443	1.89542	4.06803	0.693497	71.24	0	11.1916	61.1458	61.1458	59.4689	3.07961	0	0	1	0	0	1	1.96381	0	0	1	0	TRAIN
389	2.34521	1.49192	3.4461	5.13763	1.14613	4.26269	1.89157	4.94401	12.1836	0.538096	4.77579	3.71821	6.27548	1.85093	5.82307	0.937037	0	23.5422	6.65024	73.9946	73.9946	80.45	3.37381	0	0	0	0	0	0	1.28833	0	0	1	1	TEST
390	3.31662	3.4839	3.76243	4.82179	1.16502	3.94546	2.29089	4.92128	10.8892	0.372161	4.85166	3.66893	7.47677	1.89588	7.73469	0.910945	68.7381	0	29.0101	74.1962	74.1962	67.8283	3.78819	-0.771658	0	0	0	0	0	3.23043	0	0	1	0	TEST
391	2.64575	3.7518	4.27921	3.93183	0.850641	3.56486	1.83908	4.93035	11.8482	0.316331	5.13046	3.41721	7.44745	2.21282	9.39527	1.02236	119.398	0	61.6239	38.1723	38.1723	100.58	3.79248	-1.29356	0	1	0	0	1	-1.61312	0.942809	0	1	1	TRAIN
392	4.47214	8.32461	3.94557	4.91265	0.814882	4.75438	2.10405	5.10317	13.077	0.255254	5.24192	3.57264	8.51234	2.32432	11.4464	1.25109	64.5233	15.9981	103.931	47.0299	47.0299	169.268	4.2643	-0.710394	1	1	1	0	1	1.44524	1.21644	0	0	1	TRAIN
393	2.44949	1.91518	4.885	6.36851	0.803035	4.45482	1.64623	5.49418	13.2578	0.402321	5.18973	3.84254	7.42934	1.89134	8.23637	0.609709	62.4559	0	75.2815	72.4422	72.4422	66.9529	4.1561	0.817749	0	1	1	0	1	1.8503	0	0	1	1	TRAIN
394	3.4641	3.2767	5.9872	7.37922	0.78833	4.8817	1.75703	5.1673	14.9603	0.353942	5.60553	4.00379	7.47672	1.99084	14.6367	1.18273	98.5877	4.90088	13.2588	155.929	116.78	143.122	3.77671	-1.18992	0	1	0	1	1	3.31752	0	0	1	1	TRAIN
395	2	4.36364	2.58278	0	3.91556	2.37327	2.53954	4.17009	4	0.939263	10.6932	3.16125	7.43758	2.12206	90.4528	0	29.8496	0	33.9058	5.71325	62.4953	58.0421	3.54426	-0.258704	0	1	0	0	0	0.180172	0	0	0	0	TEST
396	1.73205	5.55982	0.196667	0	0	0	2.32379	4	3	4.27086	11.8023	3.21847	3.67329	1.07066	121	0	11.7711	0	0	0	170.346	0	3.29	0	0	0	0	0	0	2.95734	0	0	0	0	TRAIN
397	1.73205	1.09326	1.77507	7.439	1.09129	4.37366	1.78735	5.15713	17.586	0.652493	5.07072	4.01154	5.10989	1.73153	5.61438	0.818065	45.3422	2.14414	17.1339	66.2533	66.2533	66.4682	3.30025	0	0	1	0	0	1	1.53954	0.632456	0	1	1	TRAIN
398	3.39116	3.16169	5.9195	5.29832	0.849317	5.25067	1.88124	5.53211	22.1754	0.307256	5.41857	3.63104	7.43505	2.13475	13.6076	0.940282	64.6725	0	31.5233	71.2296	71.2296	184.492	4.18022	-0.626955	1	1	0	0	1	-2.68237	0	1	0	1	TEST
399	1.73205	3.11826	0.555556	0	0	1.6604	2.32379	4	3	0.934346	3.4208	3.17187	4.3677	1.25227	2.23699	0	0	0	17.6504	36.6029	36.6029	15.7669	2.48487	1.16667	0	0	0	0	0	1.67196	0	0	0	1	TEST
400	2.44949	5.57143	2.23708	0	2.10696	2.78064	2.67826	4.22833	6	0.552476	4.0041	2.99065	7.53625	1.88456	4.3645	4.20515	25.3735	0	22.2428	22.2428	22.2428	58.4902	4.03774	0	2	0	0	0	1	0.562392	0	1	0	1	TRAIN
401	3.87298	5.08734	3.13597	0	2.28224	3.68872	3.91079	4.81773	12	0.415074	4.81849	3.34857	7.81704	2.28828	6.86423	1.81191	25.3735	21.0602	72.3181	21.6552	21.6552	126.953	3.64301	-0.630833	4	1	1	0	1	1.11746	2.37841	1	0	0	TRAIN
402	2.64575	2.44434	4.52606	7.21055	0.763803	4.75622	1.61657	5.05618	12.9711	0.443987	5.49455	3.89586	7.39854	1.81669	11.5049	1.05593	81.5977	2.14414	39.3524	109.802	109.802	66.7274	4.699	0	0	1	0	0	1	1.14896	0	1	1	1	TRAIN
403	2.12132	1.61323	3.74954	2.78424	1.6075	3.49923	2.23954	4.77442	8.7761	0.608463	4.53315	3.59522	7.42893	1.93335	4.23434	0.4508	70.1773	0	35.9831	44.9376	44.9376	74.7051	3.54313	-0.303333	0	1	1	0	1	-0.282843	0	0	1	1	TRAIN
404	2	1.96023	4.01271	0	1.99735	3.4906	2.50994	5.25583	9.56101	0.564601	4.42512	3.55702	7.42596	1.72038	5.35416	0	30.2784	0	31.5447	49.34	49.34	25.1449	3.63192	1.50926	0	0	0	0	0	1.94661	0	0	1	1	TRAIN
405	2.91548	3.65557	5.18855	2.48491	1.48555	4.16833	2.49428	5.43549	11.4293	0.578579	5.30853	3.51174	7.38894	1.85242	21.1528	0.397883	38.0981	0	32.4833	108.354	19.1432	105.482	3.52668	0	0	1	0	0	1	1.96567	0.5	1	1	1	TRAIN
406	1.73205	3.33904	2.05556	0	0	1.82707	2.32379	4	3	0.837639	3.29621	2.86359	6.27668	1.85765	2.74384	0	0	0	17.6504	17.6504	17.6504	42.6833	2.34594	0	0	0	0	0	0	0.346878	0	0	0	0	TRAIN
407	3	4.25843	4.15776	4.49842	1.15898	4.02699	2.21351	4.71706	10.4447	0.424035	4.9932	3.63127	7.43382	1.77701	11.5327	0.671196	25.1449	6.7625	35.6612	107.724	68.5753	75.2935	3.67205	-0.470123	0	1	0	1	1	2.37779	0	0	1	0	TRAIN
408	2.12132	2.27273	5.12045	6.78809	0.828381	4.41372	1.72037	5.28776	15.0063	0.405573	5.34012	3.87939	7.42945	2.1687	7.39446	0.989744	206.255	0	0	78.849	78.849	206.878	3.75551	-1.58009	0	0	0	0	0	0.992145	0	0	1	0	TRAIN
409	5.24404	0.632687	5.77007	6.59715	1.45055	3.15422	2.05905	6.73589	16.2607	0.602416	6.10699	4.28519	7.42621	2.01948	19.4402	0.0983077	30.2784	0	0	396.62	5.13348	416.631	5.42661	-0.690077	0	0	0	1	0	4.91152	0	0	1	1	TRAIN
410	3.24037	2.95532	5.24355	5.96823	0.891505	4.3091	1.88488	5.03152	11.6851	0.355045	5.19376	3.76494	7.47687	2.08183	7.83728	1.07062	99.0165	0	8.8252	109.712	109.712	92.9732	3.79038	-0.995973	0	0	0	0	0	3.37399	0	0	1	0	TRAIN
411	5.56776	4.68663	5.70246	5.04986	0.781278	5.23598	2.01942	5.85623	15.4975	0.231241	5.49771	3.61017	7.43502	1.89272	16.0781	0.995672	75.6724	0	58.5887	106.054	106.054	168.656	4.35307	0.0417292	0	1	0	0	1	0.872467	0	0	0	1	TRAIN
412	2	1.99554	0.974575	0	1.59711	3.79622	2.2599	4.77007	8.95374	0.499082	4.36317	3.45415	4.36301	1.42599	5.16229	0.580357	0	0	25.254	56.8683	56.8683	15.7669	3.12472	2.90394	0	0	0	0	0	3.26699	0	0	1	1	TEST
413	4.12311	3.21373	4.19338	5.46383	0.634667	4.80879	1.50215	5.69411	20.4084	0.253214	5.33618	3.65692	7.47654	1.73338	14.9283	0.811337	68.7381	0	54.3555	55.2653	55.2653	110.512	3.7205	-0.642601	0	0	0	0	0	4.8747	0	0	1	0	TEST
414	2.73861	2.7123	4.27293	7.06918	0.764968	4.82516	1.64287	5.06272	13.9585	0.400679	5.56003	3.92924	7.47852	1.95717	15.6982	1.44352	85.4012	2.14414	6.63902	165.307	87.0099	162.789	3.63054	-1.04893	1	1	1	1	1	3.88939	1	0	1	0	TRAIN
415	3.24037	2.76164	5.46326	6.55001	0.806269	4.8397	1.74273	5.6274	14.3611	0.417685	5.87963	4.02622	7.71516	2.16046	18.1763	1.03923	148.159	42.835	30.2502	145.954	106.806	168.075	4.75856	-1.61873	0	1	0	1	1	1.02825	0.516398	1	1	0	TRAIN
416	3.80789	5.45052	5.54411	5.52943	0.67625	5.32569	1.68186	5.24392	16.5714	0.237659	5.46102	3.64075	7.43306	1.81555	15.6681	0.880838	64.6725	0	50.508	96.505	96.505	114.973	3.81654	0.864341	0	0	0	0	0	3.79665	0	0	1	0	TRAIN
417	3.16228	5.9604	3.04786	5.31382	0.43613	5.11309	1.24904	4.75562	11.5696	0.220107	5.39168	3.62695	6.27016	1.61983	13.2646	0.8003	51.4593	0	29.9533	82.1107	82.1107	87.1318	3.08903	0	1	1	1	0	1	2.83839	1.46332	0	1	1	TEST
418	4.79583	7.20956	4.9678	2.3979	2.27259	3.95794	4.65413	5.284	18	0.400133	5.45683	3.537	7.43556	2.05581	18.3118	0.360986	111.066	0	29.3697	106.612	94.3249	106.396	4.33378	-1.23455	0	0	0	0	0	0.544104	0	1	0	0	TEST
419	4.79583	7.51756	4.80209	2.3979	2.27259	3.95794	4.65413	5.284	18	0.401159	5.58784	3.59296	7.4351	1.88053	21.7773	0.413045	85.8984	0	29.3697	142.867	135.484	127.292	4.33378	-1.00862	0	0	0	0	0	0.49124	0	1	0	0	TRAIN
420	1	1.24143	3.19597	0	1.84795	2.58496	2.19238	4.56155	8.30668	0.735843	4.34062	3.43321	7.43755	2.30739	3.03926	0	59.6992	0	35.7765	28.3618	28.3618	50.2899	3.53629	-0.602593	0	1	1	0	0	-0.305631	0	0	1	0	TEST
421	3.74166	3.36365	2.95662	0	2.55693	3.39275	3.98516	4.98311	11	0.387928	4.50273	3.28086	6.38294	2.57086	7.89575	0.989543	0	0	0	0	0	256.1	3.27647	0	0	0	0	0	0	-2.49691	0	0	0	0	TEST
422	4.47214	8.20472	3.62566	2.3979	1.73697	3.92193	3.93308	4.98898	17	0.251309	5.16466	3.28685	6.36646	2.05778	21.2526	1.13595	0	0	50.1434	92.4192	14.1219	249.031	3.27544	0	0	1	0	0	1	-0.617061	0	0	0	0	TRAIN
423	1.87083	1.26426	1.78534	7.54681	1.0425	4.3286	1.78465	5.17148	17.5605	0.616852	5.13291	4.0104	5.14857	1.68602	6.20244	1.22092	62.1277	2.14414	30.86	58.4539	58.4539	83.2538	3.30857	0	0	1	0	0	1	0.751876	0.877205	0	1	1	TEST
424	1.22474	1.39909	1.13722	0	1.90252	1.92193	2.34085	4.73205	9.00288	0.815774	4.45647	3.57167	5.27333	1.71625	3.85173	0	50.3566	5.69728	5.69728	5.69728	5.69728	149.048	2.82481	0	0	1	0	0	0	-0.0203347	0	0	1	1	TRAIN
425	3.24037	2.67	5.50863	6.45559	0.804674	4.79465	1.74054	5.63366	14.962	0.415646	5.80434	3.98227	7.71515	2.14	15.7487	1.07381	148.159	1.3584	37.9027	115.316	115.316	128.927	4.75511	-1.46048	0	1	0	0	1	0.760253	0.516398	1	1	0	TRAIN
426	3.87298	5.46555	3.68661	5.2291	1.03588	4.29053	2.33985	4.87429	12.5809	0.306663	5.31746	3.64353	7.47707	1.93556	19.3665	1.15987	68.7381	0	45.3423	135.5	57.2023	179.023	3.73466	-0.990756	0	1	0	0	1	0.159523	0	0	1	1	TRAIN
427	2.12132	2.19452	3.70977	1.09861	1.72661	3.4289	2.43716	4.95814	9.83636	0.449154	4.34765	3.34567	6.26971	1.54427	6.45268	0.0755403	0	0	34.0792	34.0792	34.0792	42.6833	3.05072	0	0	0	0	0	0	2.50245	0	0	1	0	TRAIN
428	4.30116	6.02338	5.8587	6.63455	0.562664	4.67923	1.53382	5.57139	12.3947	0.230857	5.58637	3.77804	6.28288	1.64177	14.8451	0.97348	0	0	34.2188	185.212	185.212	64.6831	4.05208	0	0	1	0	0	1	4.10016	0	0	1	0	TRAIN
429	1.22474	1.10983	1.30926	4.88753	1.55054	3.77356	1.97464	4.80194	12.858	0.872139	4.95948	3.72341	4.82381	1.61782	9.72522	1.56052	0	0	18.0108	119.624	119.624	45.192	4.8487	0.848333	0	1	0	0	1	1.76878	0	0	1	1	TRAIN
430	1.22474	0.844027	1.23838	4.87472	1.65971	3.80735	2.02857	4.96381	13.018	0.796607	4.83278	3.71314	5.04825	1.6863	6.13044	0	76.289	5.08467	42.1897	68.2272	68.2272	78.7631	3.82465	0.547454	0	1	0	0	1	0.557443	0	0	1	0	TRAIN
431	3	1.48822	5.90903	1.38629	1.1896	2.88083	1.79938	5.63462	6.69823	0.749263	5.18923	3.75352	7.38424	1.72669	11.594	0.135763	28.3514	0	32.7927	40.8809	32.7927	20.2632	3.93414	0	0	1	0	0	1	1.96567	0	1	0	1	TRAIN
432	3.16228	4.05259	1.90923	5.31012	0.895711	4.57405	1.83045	4.87554	10.1283	0.362921	5.0634	3.5797	4.95149	1.52322	8.71108	0.98933	28.5566	19.5478	18.4888	99.0548	99.0548	26.2929	3.17217	0	0	1	0	0	1	1.64048	0.632456	0	1	0	TEST
433	3.16228	4.30633	0.436343	5.31012	0.895711	4.34623	1.83045	4.87554	10.1283	0.366035	5.21343	3.63851	4.52111	1.48798	12.6183	0.808688	0	13.1295	9.44143	132.486	132.486	0	3.17217	0	0	1	0	0	1	2.72823	0	0	1	0	TEST
434	1	0.851979	1.12731	0	2.70414	3.33468	2.3253	4.65109	7.55309	0.889534	4.45332	3.43644	4.83615	1.54731	6.94052	0	0	23.8267	21.1351	71.9678	71.9678	45.192	3.8834	0.763889	0	1	0	0	0	-0.0512873	0.5	0	0	1	TRAIN
435	3	4.45132	3.07088	0	2.17457	3.78418	3.15528	4.64371	8	0.483669	4.52007	3.25477	7.47706	2.14035	9.39789	0.83213	68.7381	0	36.3314	43.754	43.754	100.725	4.09272	-0.912917	0	1	0	0	0	-2.05517	0	0	0	0	TRAIN
436	4.74342	6.24819	5.37039	6.97149	0.473088	5.33127	1.40721	5.08353	14.2169	0.20636	5.75667	3.84937	7.47983	2.06526	13.8768	0.729237	246.239	4.22701	41.0329	85.8335	85.8335	293.738	3.77693	-3.05403	0	1	0	0	1	1.31127	1.03811	0	1	0	TRAIN
437	2	1.37854	2.19719	7.55231	0.988904	4.43063	1.73706	5.09015	17.26	0.583349	5.11131	4.03162	5.15321	1.72882	6.31117	0.63048	0	9.67242	0	90.5591	90.5591	53.4044	3.27749	0	0	1	0	0	1	1.95023	0	0	1	1	TRAIN
438	1.58114	1.35028	3.02255	2.15104	1.89469	3.68354	2.42444	4.9421	9.64425	0.697758	4.51224	3.68676	6.39117	1.96781	4.81558	0.736803	85.3667	0	0	44.5552	44.5552	96.3666	3.23771	0	0	0	0	0	0	0.678573	0	0	1	1	TEST
439	3.60555	4.11439	2.07282	6.13489	0.927811	3.49591	1.99137	5.43751	11.7022	0.353548	5.56347	3.75446	5.14041	1.71619	22.7836	1.29036	0	117.446	0	231.88	114.434	139.446	3.95999	0	0	0	0	1	0	4.26825	0	0	1	0	TRAIN
440	1.41421	1.52156	2.79663	0	1.63002	3.10188	2.1804	4.60651	8.59916	0.701295	4.38814	3.60374	6.31278	1.83292	4.32035	0.808284	42.6833	0	0	54.0315	54.0315	53.6832	2.8803	0	0	0	0	0	0	1.24635	0	0	1	1	TRAIN
441	2	1.36123	4.1731	7.05409	1.06222	4.38684	1.79535	5.22031	17.1185	0.583387	5.10987	3.94398	7.43304	1.87748	5.65321	0.814025	32.3363	16.6073	0	88.8005	88.8005	56.652	3.65876	-0.405828	0	0	0	0	0	1.68258	0	0	1	1	TRAIN
442	0	1.93052	0.1875	0	0	0	1	2	1	2.41523	6.86267	2.25372	3.53716	1.16216	32.7828	0	0	0	0	54.6488	8.69473	0	1.48	0	0	0	0	0	0	1.11468	0	0	0	0	TRAIN
443	2.64575	5.29876	1.4375	0	5.18377	2.05664	3.16849	5.08613	5	0.7165	3.75108	3.18622	4.5258	1.18102	3.8654	0	10.9999	0	26.4756	37.3587	37.3587	10.9999	3.39872	0	0	0	0	0	0	1.2094	0	0	0	1	TRAIN
444	2	3.5974	2.36806	0	3.91556	2.64644	2.53954	4.17009	4	0.897085	3.75655	3.06747	7.4449	2.06184	3.0376	0	25.1449	6.7625	32.8972	17.6456	17.6456	69.042	3.56986	-0.74537	0	1	0	0	0	-1.22202	0	0	0	1	TEST
445	2.23607	2.55844	2.72222	0	3.13516	3.02206	2.75418	4.30278	5	0.753137	3.91029	3.08459	7.43462	2.02104	3.62339	0	25.1449	6.7625	17.8882	17.6456	17.6456	68.9195	3.61551	-0.62963	0	1	1	0	1	-1.21785	0	0	0	0	TEST
446	3.60555	3.91353	4.59851	6.32716	0.735835	4.08307	1.75379	5.3678	11.4519	0.322268	5.37646	3.76226	7.432	1.76289	14.2085	0.662028	32.3363	0	17.6504	165.799	126.65	86.2933	4.13239	-0.412706	0	0	0	1	0	3.93232	0	0	1	1	TRAIN
447	2.64575	3.50182	1.22452	5.99801	0.705465	4.12872	1.62732	4.78993	10.8414	0.367699	5.10265	3.68025	4.95256	1.52654	7.8546	0.801278	0	33.326	8.8252	112.884	112.884	33.326	2.99065	0	1	1	1	0	1	3.47014	0.365148	0	1	1	TRAIN
448	2.44949	1.94261	3.05051	4.06689	1.34804	3.57662	2.25419	4.81361	9.68668	0.536104	4.74784	3.63743	7.53094	2.02093	4.72677	0.978843	50.7469	38.4447	3.00179	51.8149	51.8149	89.1916	3.08363	0	3	1	1	0	1	1.07481	0.894427	1	1	1	TRAIN
449	4.79583	15.701	3.92823	3.78419	1.07732	4.73238	3.22589	4.47416	22	0.162578	5.12653	3.29045	7.43123	1.69342	13.3711	0.989641	32.3363	8.14093	36.7051	92.6844	92.6844	90.0656	3.67211	-0.111502	1	0	0	0	0	3.97142	0	1	0	0	TRAIN
450	4.47214	17.0647	3.90884	3.52636	0.993423	4.381	2.96272	4.34668	20	0.161427	5.01156	3.20846	7.43123	1.55421	11.8551	0.786959	32.3363	0	39.2396	95.219	95.219	36.1448	3.67211	-0.0827017	0	0	0	0	0	4.80303	0	0	0	0	TEST
451	2.64575	2.12058	3.18981	0	3.25311	3.13957	3.14421	4.62865	6	0.6688	4.11396	3.39572	7.43318	2.02541	3.97217	0	32.3363	0	8.8252	45.8521	45.8521	51.9117	3.65211	0.0856481	0	0	0	0	0	0.888152	0	0	0	0	TRAIN
452	3.31662	3.44601	2.61333	0	2.40418	3.45656	3.50272	4.73513	9	0.549355	4.64169	3.33209	7.81704	2.47208	4.15973	2.4525	25.3735	21.0602	52.562	10.2955	10.2955	126.953	3.64119	-0.680556	4	1	1	0	1	-0.264394	2.37841	1	0	1	TRAIN
453	2.64575	1.64754	5.47435	7.03216	1.0287	4.11626	1.90053	5.40092	19.523	0.453922	5.36704	3.96489	7.81499	2.30722	6.44891	1.29191	60.5568	0	8.8252	94.6343	94.6343	101.037	3.90267	-0.815833	2	1	0	0	1	3.0831	0	1	1	1	TEST
454	2.73861	2.69506	4.28161	5.47646	0.777507	4.43063	1.6922	4.75556	10.2219	0.400727	5.15587	3.68947	7.81539	2.14401	7.04009	0.846036	45.9634	9.72464	53.6265	53.6755	53.6755	102.062	3.78158	-0.296476	3	1	1	0	1	0.832025	1.33748	1	0	1	TRAIN
455	2.73861	1.97439	4.20787	3.94401	1.47425	3.54644	2.33283	4.92358	9.46461	0.516576	4.73567	3.62989	7.53237	2.0759	4.98382	1.21133	55.223	19.1611	3.00179	63.6678	63.6678	69.6795	3.67165	-0.397593	2	1	1	0	1	1.52199	1	1	1	1	TEST
456	4.12311	5.98483	3.92612	2.77259	1.56876	4.41816	3.45734	4.701	14	0.281415	4.85555	3.27146	7.53252	2.29781	8.25373	1.10489	119.257	23.4369	61.0845	20.7568	20.7568	170.405	3.72749	-1.70657	2	1	1	0	1	-2.96734	1.41421	1	0	1	TRAIN
457	1.41421	1.48711	3.04625	1.09861	1.89371	3.78494	2.29726	4.78289	8.92094	0.593137	4.25182	3.21242	7.52899	1.75056	5.15523	1.86839	25.3735	19.1611	21.5363	18.5345	18.5345	44.5346	3.09172	0	2	1	1	0	1	0.957545	1	1	1	1	TRAIN
458	3.60555	3.69824	3.41153	5.31567	1.17967	3.56545	2.36732	5.27246	11.2679	0.511793	5.48256	3.70295	7.81491	2.03463	13.6094	0.532728	25.5028	0	0	120.49	108.831	112.671	3.77842	0	2	1	0	0	1	1.60228	0	1	1	0	TRAIN
459	1	0.802615	3.5	0	2.70414	3.32782	2.3253	4.65109	7.55309	0.778304	4.04975	3.31556	7.42611	1.8944	3.93945	0	29.8496	0	10.2991	20.2758	20.2758	25.1449	3.71499	0.291667	0	1	0	0	0	0.197611	0	0	0	0	TRAIN
460	1.87083	1.54232	3.0237	0	1.76418	3.43162	2.22836	4.73205	8.47908	0.646834	4.34659	3.58086	6.27555	1.82162	4.39843	0.721947	0	0	8.8252	59.392	59.392	42.6833	3.09163	0	0	0	0	0	0	1.92467	0	0	1	1	TRAIN
461	1.22474	1.28127	2.85009	0	1.92125	3.57247	2.34623	4.80696	8.99801	0.740573	4.41275	3.68189	6.39074	2.03556	4.32035	1.87763	85.3667	0	8.8252	40.4395	40.4395	85.3667	3.04914	0	0	0	0	0	0	1.24635	0	0	1	1	TRAIN
462	2.12132	1.39842	0.393611	8.44093	0.725947	4.38879	1.44052	5.3427	23.415	0.499085	5.38094	4.11815	4.87248	1.65108	7.61787	0.883606	0	0	13.8943	124.175	124.175	0	3.48113	0	0	0	0	0	0	5.84758	0	0	1	1	TRAIN
463	3.24037	4.94762	4.19632	6.3381	0.55704	5.15032	1.50492	5.1984	13.2124	0.245881	5.73453	3.75651	7.47695	2.05294	22.1311	0.963473	97.7488	11.7711	2.53453	157.485	79.1877	318.073	3.86107	-1.45939	0	1	0	1	1	1.29025	0	0	1	1	TRAIN
464	2	2.72919	1.80954	5.87317	0.849556	3.77186	1.77547	4.8871	11.1896	0.377632	5.03608	3.75029	4.8169	1.62851	7.70013	0.893303	0	0	20.1849	95.2982	95.2982	65.7944	3.10048	0	0	1	0	0	1	3.30571	0	0	1	1	TRAIN
465	1	2.57143	0.652778	0	0	0	1.63299	3	2	1.82259	4.19803	2.60226	4.83725	1.64392	8.43771	0	0	23.5422	3.16459	81.4619	3.16459	78.2973	2.2	0	0	0	0	0	0	1.36388	0	0	0	1	TRAIN
466	3	3.66185	0.203562	5.91502	0.711459	3.13756	1.66698	4.83002	11.0333	0.321008	5.11147	3.69797	4.57023	1.47648	8.93246	0.881035	0	0	2.53453	123.815	123.815	0	3.06301	0	0	1	0	0	1	3.79833	0	0	1	1	TRAIN
467	7.54983	14.4241	6.10725	7.81803	0.467973	3.58722	1.48618	5.43551	21.1137	0.17893	6.5449	3.90797	6.31635	1.50805	41.7633	1.931	128.05	0	219.408	435.529	406.194	148.815	3.68127	0	0	0	0	0	0	10.4647	0	1	1	0	TRAIN
468	2	3.5974	0.819444	0	3.91556	2.35539	2.53954	4.17009	4	0.903034	3.69581	3.13108	5.08523	1.63569	3.04283	0	0	1.89909	82.5799	10.2955	10.2955	82.5799	2.77527	0.12963	0	1	0	0	0	-0.816018	0	0	0	0	TRAIN
469	1.58114	1.02318	4.24509	5.2291	1.49793	3.89241	2.08675	5.09697	13.4521	0.686737	4.80194	3.76816	7.42859	1.8821	4.6723	0.554212	67.0248	6.98376	78.2112	28.7034	28.7034	91.6132	3.67383	-0.17713	0	1	0	0	1	0.455536	1.14471	0	1	0	TRAIN
470	1.22474	1.28127	2.93259	0	1.92125	3.57247	2.34623	4.80696	8.99801	0.740031	4.4127	3.6836	6.32984	2.03705	4.32035	1.24232	85.3667	0	8.8252	40.4395	40.4395	85.3667	3.03119	0	0	0	0	0	0	1.24635	0	0	1	0	TRAIN
471	2	3.53247	2.0625	0	3.91556	2.06717	2.53954	4.17009	4	1.04679	3.96262	3.16921	7.81703	2.64641	2.8418	0	0	0	17.8882	8.39638	8.39638	50.7469	3.60696	0	2	1	1	0	0	-0.4284	1	1	0	1	TRAIN
472	3.24037	4.15032	3.73885	3.8725	0.989098	4.54839	2.08574	4.78436	10.4474	0.324911	4.85021	3.55726	7.52918	1.88964	7.61629	0.886879	65.7012	19.1611	28.2714	55.8041	55.8041	104.003	3.13912	0	2	1	1	0	1	0.374832	0.755929	1	1	1	TRAIN
473	3.24037	3.96313	4.54724	3.8725	0.989098	4.42325	2.08574	4.78436	10.4474	0.329044	4.89721	3.60101	7.52922	1.96368	7.08752	0.912228	95.9796	19.1611	28.2714	60.9375	60.9375	86.465	3.59875	0.0438879	2	1	1	0	1	0.556924	0.755929	1	1	1	TEST
474	2.23607	2.06494	2.18931	0	3.13516	2.28939	2.75418	4.30278	5	0.812323	4.08064	3.19708	7.53006	2.28311	2.30225	0	41.5464	19.1611	34.0611	24.5693	24.5693	75.5939	3.96182	0	2	1	1	0	0	-0.513308	1	1	0	1	TEST
475	2.44949	3.16027	3.02264	0	2.45966	3.52164	2.83182	4.3342	6	0.596954	4.07779	3.24737	7.42913	2.22511	3.8962	0.970309	29.8496	23.5422	18.0108	29.9478	29.9478	83.5952	3.45082	-0.358796	0	1	0	0	0	-0.357067	0	0	0	0	TEST
476	1.22474	1.09514	1.22231	6.05947	1.3647	4.08418	1.93232	4.90997	13.9763	0.727442	4.68478	3.83791	4.85989	1.61478	4.316	1.77689	28.5566	0	20.0168	73.1565	73.1565	16.7855	2.93693	0	0	1	0	0	1	2.36899	0	0	1	0	TRAIN
477	1.22474	0.986437	1.28074	6.01875	1.47588	3.98418	1.99318	5.00323	14.3087	0.751511	4.68562	3.85451	4.86363	1.62076	4.316	0.24781	28.5566	0	20.0168	73.1565	73.1565	16.7855	3.05846	0	0	1	0	0	1	2.36899	0	0	1	0	TRAIN
478	2	2.94476	2.07351	7.04879	0.739886	4.69785	1.5486	5.12896	18.3677	0.403291	5.43812	3.84248	4.79557	1.5304	13.8716	1.28472	2.32792	0	40.2822	138.755	138.755	16.7855	4.59209	1.13356	0	1	0	0	1	3.50467	0.632456	0	1	0	TRAIN
479	2.54951	1.75571	3.373	3.44601	1.72126	3.88018	2.50988	4.99332	9.9744	0.593815	4.80945	3.71931	7.815	2.28603	5.79638	2.01543	30.8846	0	26.5333	24.6342	24.6342	110.216	3.81321	0	2	1	0	0	1	0.442634	0.816497	1	0	1	TRAIN
480	3.16228	3.13293	4.07886	5.10405	1.32633	3.74116	2.5184	5.10606	12.2053	0.427164	4.9465	3.76766	7.43401	1.68121	8.3199	0.367706	25.1449	6.7625	35.6612	82.9259	82.9259	36.1448	3.66314	-0.447775	0	1	0	0	1	1.851	0.142857	0	1	0	TEST
481	3.31662	3.33901	5.3814	5.91502	0.767311	3.09644	1.76911	5	11.3572	0.327011	5.20333	3.76636	7.42709	1.68994	9.15272	0.249386	30.2784	0	0	126.414	126.414	25.1449	3.58191	0.0561224	0	1	0	0	1	3.41876	0	0	1	1	TEST
482	5.47723	0.734908	2.67752	6.59715	1.43388	2.55034	2.07783	6.73589	16.4978	0.587569	6.2175	4.29199	5.30448	1.91032	20.7771	0	0	0	0	469.784	0	469.784	5.41836	0	0	0	0	1	0	6.5153	0	0	1	1	TRAIN
483	5.24404	0.716718	2.67419	6.50877	1.41055	3.55034	2.03201	6.62787	16.1011	0.592918	6.14585	4.25739	5.26913	1.91673	23.5385	0	0	0	0	430.635	0	430.635	5.31607	0	0	0	0	1	0	6.29651	0	0	1	1	TRAIN
484	4.89898	9.14091	5.24013	4.44265	0.827308	5.2183	2.30604	5.18572	17.2316	0.181555	5.33369	3.52682	7.43173	1.87601	15.5294	0.939763	62.6147	0	45.5303	87.6906	87.6906	146.656	3.83751	-0.0337331	0	0	0	0	0	2.64904	0	0	0	0	TRAIN
485	3.74166	1.85911	5.77068	6.35957	0.885564	4.9278	1.73703	5.67938	17.4458	0.370789	5.43452	3.9079	7.44558	2.07005	10.989	0.946092	102.215	6.7625	102.453	55.3205	55.3205	163.229	4.21827	-0.937672	0	1	0	0	1	-0.699479	0.333333	0	1	1	TRAIN
486	2	3.92208	2.23611	0	3.91556	2.375	2.53954	4.17009	4	0.906152	4.18564	3.11823	7.47704	2.40861	6.5443	0	68.7381	0	2.84956	42.9081	3.75944	106.977	3.63569	-0.979938	0	0	0	0	0	0.133089	0	0	0	0	TRAIN
487	3.08221	2.47586	5.44715	5.1299	0.929701	5.03955	1.90471	5.84954	21.0695	0.34673	5.29686	3.63822	7.43512	2.02712	12.2136	1.12396	64.6725	0	40.9383	64.8584	64.8584	157.656	4.33242	-0.694752	0	1	0	0	1	0.547523	0	0	0	1	TRAIN
488	2.54951	3.00452	3.92526	7.48337	0.648012	4.61635	1.45725	5.18305	14.195	0.402145	5.61159	3.91542	7.8149	1.91299	12.6062	0.526067	44.5709	3.68632	16.4699	113.192	113.192	95.3179	3.78215	0	2	1	0	0	1	3.37894	1.06366	1	1	1	TEST
489	4.24264	12.9364	3.47384	2.3979	1.46322	3.03915	3.23283	5.09963	13	0.368303	5.59328	3.63935	7.72701	2.53283	15.9832	0.927026	105.717	0	14.2538	44.1342	44.1342	105.717	5.04362	0	0	0	0	0	0	-0.500464	0	1	0	0	TRAIN
490	3.53553	3.3622	4.15198	6.437	0.633502	4.56941	1.52027	5.35193	13.3216	0.308678	5.33031	3.75785	7.47739	1.81645	10.6342	0.770186	68.7381	0	25.254	116.774	116.774	78.8282	4.09857	-0.969644	0	0	0	0	0	4.12417	0	0	1	1	TRAIN
491	2.64575	1.90709	4.91519	6.07915	1.21857	4.46109	2.14506	5.24312	15.6882	0.469812	5.09618	3.81349	7.48302	2.11576	7.23441	1.22774	115.802	14.099	22.5129	65.2552	65.2552	109.759	3.78173	-1.90798	0	1	0	0	1	1.31492	0.5	0	1	1	TRAIN
492	1.41421	1.10761	1.76954	6.13626	1.4618	3.27761	2.05264	5.09651	14.6918	0.691945	4.76418	3.90507	4.94324	1.75711	4.90334	1.54125	0	0	0	67.5169	67.5169	65.7944	3.13404	0	0	1	0	0	1	2.0242	0	0	1	1	TRAIN
493	1.22474	1.10397	1.62387	6.05947	1.3647	3.68418	1.93232	4.90997	13.9763	0.714389	4.6783	3.85262	4.84918	1.7326	4.316	1.7348	0	0	0	74.2364	74.2364	32.8972	2.92311	0	0	1	0	0	1	2.63699	0	0	1	1	TRAIN
494	2.73861	3.0483	4.91343	4.86272	0.847019	4.29465	1.8006	4.98972	11.2475	0.346207	5.07645	3.71474	7.43077	1.86681	8.7119	1.95123	59.6992	0	48.0659	73.8968	73.8968	50.2899	3.77891	-0.0469393	0	1	0	0	1	1.64048	0.333333	0	1	0	TRAIN
495	1.22474	1.51294	1.13704	4.44044	1.23277	4.28679	1.88573	4.94867	9.93317	0.534344	4.61614	3.57889	4.71492	1.48979	5.80004	1.45227	40.3277	0	28.3939	55.8041	55.8041	16.7855	3.32552	0	0	1	0	0	1	1.27247	0.25	0	1	0	TRAIN
496	3.16228	3.31345	3.96616	4.29046	1.15376	4.06148	2.21486	4.73608	9.97118	0.488786	5.14641	3.71557	7.81493	2.20775	9.21764	1.03327	53.7016	4.27582	57.4302	56.9622	56.9622	92.6774	3.78268	-0.419678	2	1	0	0	1	0.260765	0.721125	1	0	1	TRAIN
497	3.87298	7.23811	3.14517	0	2.26392	2.67379	3.87427	4.67513	12	0.382424	4.76283	3.28961	7.48209	2.71321	6.55755	0.0122121	206.214	0	9.44143	9.04674	9.04674	203.485	3.70694	-3.78472	0	1	0	0	0	-1.16923	0	0	0	1	TEST
498	3.24037	3.48764	3.79273	5.08856	1.32862	4.32486	2.5053	5.0076	12.2489	0.434495	5.05518	3.74174	7.81492	2.14349	7.45512	1.2303	29.8496	0	40.2535	66.1331	66.1331	86.8917	3.81336	-0.279206	2	1	0	0	1	1.67887	0.25	1	1	0	TEST
499	2.34521	1.86686	3.26196	2.15104	1.53103	3.88418	2.40274	4.91826	10.1756	0.58597	4.80657	3.72804	7.81491	2.14541	5.29894	0.683994	0	0	0	50.0687	50.0687	94.644	3.78132	0	2	1	0	0	1	1.18108	0	1	1	1	TEST
500	3.16228	3.28783	3.17385	4.84419	1.0437	4.12193	2.10088	4.7243	9.91246	0.448816	5.00116	3.68574	7.81539	2.26831	4.97284	0.649227	45.9634	9.72464	72.4684	42.7446	42.7446	134.959	3.78151	-0.831198	2	1	1	0	1	-0.171929	0.365148	1	0	1	TRAIN
501	2.82843	1.81934	3.09381	3.3322	1.46423	3.85217	2.34673	4.80569	9.26186	0.593549	4.86576	3.71051	7.81538	2.2464	4.27372	0.615939	2.32792	5.44882	51.1647	31.7492	31.7492	149.205	3.78807	-0.302685	3	1	0	0	1	0.289052	0.2	1	0	0	TRAIN
502	3.87298	3.97671	3.76059	5.09375	1.29437	3.71929	2.52284	4.88691	11.3676	0.414754	5.16579	3.69043	7.8154	2.32298	7.07791	0.95722	64.6725	17.2199	22.6704	61.8139	61.8139	132.544	3.80688	-1.42536	2	1	0	0	1	1.23802	0	1	0	0	TRAIN
503	2.34521	1.60725	3.53682	7.11496	0.832016	4.50163	1.61551	5.05741	12.4747	0.517535	5.25421	3.89128	7.81538	2.05284	5.27971	0.869119	30.2719	19.9767	17.0692	80.4169	80.4169	77.0398	3.78233	0	2	1	0	0	1	2.22192	0.57735	1	1	1	TRAIN
504	2.23607	1.66565	3.54401	5.3799	1.02331	3.96982	1.83344	4.84532	9.60764	0.542507	5.04456	3.72226	7.81539	2.26136	3.13129	0.716075	29.9595	12.2113	39.5712	40.9984	40.9984	113.062	3.7864	-0.873006	2	1	1	0	1	1.17607	0.365148	1	0	1	TRAIN
505	3.16228	3.01194	3.67771	6.21897	0.780564	4.36371	1.72467	4.84883	10.496	0.385172	5.26125	3.75371	7.81539	2.13685	6.41204	1.1446	71.2517	5.44882	38.9816	52.4048	52.4048	131.515	3.78212	-0.232976	3	1	0	0	1	1.49311	0.512993	1	0	1	TRAIN
506	3	2.72349	3.76738	6.17781	0.849407	4.22987	1.77524	4.85043	10.3102	0.478286	5.36782	3.7858	7.81539	2.14529	8.2298	0.963984	64.1052	5.44882	33.2863	75.6592	75.6592	118.725	3.78212	-0.265625	3	1	1	0	1	1.37091	0.504717	1	0	1	TEST
507	2.12132	1.60111	3.27785	5.71949	1.07732	3.96982	1.82948	4.83655	9.2606	0.604671	5.15668	3.76557	7.81537	2.11487	6.506	0.740373	35.7769	17.2199	14.997	78.3251	78.3251	77.0398	3.78209	0	2	1	0	0	1	1.10471	0.2	1	0	1	TEST
508	3	2.75203	3.79515	6.17781	0.849407	4.30351	1.77524	4.85043	10.3102	0.439568	5.35735	3.79049	7.81539	2.14151	8.83311	0.963344	46.6351	17.2199	35.1134	85.1354	85.1354	102.185	3.78212	-0.225625	2	1	0	0	1	1.62445	0.338062	1	0	1	TRAIN
509	2.64575	2.34119	3.38862	6.13489	0.884912	4.29708	1.7787	4.84843	10.0762	0.475047	5.31481	3.78845	7.81539	2.18847	7.45322	1.14863	64.6969	17.2199	26.2882	82.6009	82.6009	102.185	3.78211	0	2	1	0	0	1	1.30724	0.338062	1	0	1	TRAIN
510	3.67423	4.15235	4.07628	6.71988	0.880025	4.01532	1.96014	4.96663	12.783	0.36915	5.44062	3.76396	7.81541	2.15339	7.78694	0.716389	110.056	9.24701	62.4901	62.6071	62.6071	160.901	3.78213	-0.86787	2	1	0	0	1	1.95729	0.81719	1	1	1	TRAIN
511	3	2.9861	3.05773	0	2.65822	3.24644	3.41009	4.70489	8	0.556092	4.42061	3.47625	7.81479	2.21379	5.20346	1.3099	2.75675	0	22.7195	34.9525	34.9525	50.7469	3.8083	0.31713	2	1	0	0	1	1.82354	0	1	0	1	TRAIN
512	2.12132	1.5909	3.24398	3.44601	1.79006	3.50326	2.47051	4.96461	9.92946	0.65769	4.74191	3.74029	7.81492	2.20131	4.64626	3.22301	0	0	0	36.699	36.699	116.541	3.80217	0	2	1	0	0	1	0.827858	0	1	1	0	TRAIN
513	2.12132	1.5909	3.17363	0	1.64763	3.39215	2.39563	4.89545	9.72361	0.638439	4.74194	3.73023	7.81491	2.21537	4.64626	2.22087	0	0	0	36.699	36.699	116.541	3.78075	0	2	1	0	0	1	0.827858	0	1	1	0	TEST
514	2.12132	1.60862	3.21445	0	1.64763	3.78714	2.39563	4.89545	9.72361	0.632078	4.73402	3.73553	7.81491	2.19738	4.87838	2.79127	0	0	8.8252	45.953	45.953	83.6441	3.7809	0	2	1	0	0	1	1.70074	0	1	1	0	TEST
515	2.34521	1.10259	3.86348	7.0288	1.14626	3.9183	1.82927	5.2325	16.4763	0.618795	5.07992	3.98856	7.81491	2.09144	5.5091	1.83424	0	0	5.06906	66.7241	66.7241	50.7469	3.81074	0	2	1	0	0	1	3.59093	0	1	1	1	TRAIN
516	2	1.61323	3.07697	0	1.59711	3	2.2599	4.77007	8.95374	0.672311	4.65511	3.67592	7.81491	2.24433	4.04489	1.08485	0	0	0	43.4185	43.4185	83.6441	3.77804	0	2	1	0	0	1	1.34752	0	1	1	0	TRAIN
517	2.23607	1.60862	3.3062	3.66276	1.77859	3.68354	2.44297	4.95295	9.93994	0.656192	4.726	3.69695	7.8149	2.16826	4.7007	1.66654	0	0	0	56.7882	56.7882	61.7468	3.80928	0	2	1	0	0	1	1.70074	0	1	1	1	TRAIN
518	2.73861	1.94511	3.45306	3.1689	1.50303	4.0374	2.46485	4.99581	10.6402	0.539239	4.92553	3.76651	7.81494	2.49625	4.75661	1.25868	68.7381	0	0	38.0377	38.0377	151.472	3.78319	-1.20148	2	1	0	0	1	1.64176	0	1	1	0	TRAIN
519	1.87083	1.33925	3.00648	0	1.76418	2.89629	2.22836	4.73205	8.47908	0.75069	4.56079	3.63243	7.8149	2.29991	3.43909	4.0723	0	0	0	50.138	50.138	50.7469	3.77744	0	2	1	0	0	1	1.88735	0	1	1	1	TRAIN
520	2.12132	1.14928	3.33775	6.24693	1.24978	3.96982	1.9205	4.93102	12.323	0.687385	4.91428	3.85712	7.81491	2.1661	3.81199	2.05438	37.1752	2.14414	27.5483	44.0924	44.0924	67.5324	3.78068	0	2	1	0	0	1	1.36671	0.447214	1	1	0	TRAIN
521	2.64575	1.9553	3.31223	0	1.38955	3.49923	2.29514	4.84224	9.74486	0.548696	4.85385	3.71281	7.81493	2.56393	4.10397	0.803081	68.7381	0	0	44.7572	44.7572	118.575	3.77916	-1.09269	2	1	0	0	1	1.63471	0	1	1	1	TEST
522	2.44949	5.57143	2.56375	0	2.10696	3.20282	2.67826	4.22833	6	0.537876	4.15407	3.21914	7.81281	2.42471	4.3645	4.20515	0	0	16	16	16	50.7469	3.67204	0	2	1	0	0	1	1.18139	0	1	0	0	TEST
523	2.64575	2.28938	2.73588	0	3.25311	3.15564	3.14421	4.62865	6	0.654606	4.18039	3.32405	7.813	2.42015	4.3645	0	0	0	20.1849	20.1849	20.1849	50.7469	3.76719	0	2	1	0	0	0	1.18139	0	1	0	1	TRAIN
524	2	3.57143	2.17361	0	3.91556	2.11425	2.53954	4.17009	4	0.941738	3.93796	3.20583	7.81297	2.80479	3.0376	0	0	0	10.9309	10.9309	10.9309	50.7469	3.66776	0	2	1	0	0	0	0.208982	0	1	0	0	TRAIN
525	2.54951	3.28297	3.4911	6.0001	0.793354	4.13366	1.74197	4.90123	11.2495	0.406767	5.4439	3.73966	7.81492	2.02205	13.7768	0.413914	0	0	0	164.876	86.5785	140.044	3.77841	0	2	1	0	1	1	4.03996	0	1	1	1	TRAIN
526	2.34521	1.37378	3.67925	6.91448	0.92566	4.24386	1.681	5.04917	16.7016	0.505074	5.12352	3.89509	7.81491	2.07851	5.60066	1.47387	0	0	2.53453	84.3673	84.3673	50.7469	3.78305	0	2	1	0	0	1	3.78023	0	1	1	1	TEST
527	2.73861	2.55475	4.06078	5.53733	0.777507	4.34965	1.6922	4.75556	10.2219	0.407687	5.2009	3.69026	7.8154	2.35401	5.25944	1.05464	75.813	9.72464	44.8012	49.5549	49.5549	127.207	3.84542	-1.10659	3	1	1	0	1	0.0959008	1.33748	1	0	1	TRAIN
528	2.64575	2.46542	4.07119	5.41165	0.791081	4.33496	1.67272	4.75515	9.8577	0.428719	5.11008	3.68881	7.81539	2.20343	6.07853	0.87164	45.9634	9.72464	46.907	46.956	46.956	102.062	3.78156	-0.294161	3	1	1	0	1	0.514816	1.33748	1	0	1	TRAIN
529	2.64575	5.53247	1.33627	0	2.16497	2.83978	2.91961	4.36234	7	0.501291	4.6066	2.98715	4.57866	1.50065	14.9757	2.05753	0	0	13.0348	96.6042	18.3069	78.2973	2.76358	0	0	1	0	0	0	1.94034	0	0	0	1	TEST
530	1.73205	2.94943	1.80556	0	0	1.04027	2.32379	4	3	1.44389	3.82005	3.17762	7.81853	2.90877	2.24018	0	0	0	0	8.39638	8.39638	50.7469	3.62094	0	2	1	0	0	0	-0.432569	0	1	0	1	TRAIN
531	2.12132	1.29804	3.62047	6.38572	1.3359	3.54644	2.02211	5.09244	14.2388	0.652554	4.94873	3.89828	7.81491	2.16112	4.5635	2.41295	0	0	0	74.2364	74.2364	50.7469	3.80422	0	2	1	0	0	1	3.01842	0	1	1	0	TRAIN
532	2.82843	2.47531	2.96713	0	3.08241	2.69478	3.35488	4.69353	7	0.571797	4.26931	3.33261	7.81285	2.2875	4.97859	0	0	0	22.7195	22.7195	22.7195	50.7469	3.77552	0	2	1	0	0	0	1.59083	0	1	0	1	TRAIN
533	2.23607	4.96032	2.40486	0	2.636	2.87314	2.62721	4.21432	5	0.683837	4.05163	3.21543	7.81282	2.60394	3.72509	0	0	0	13.4654	13.4654	13.4654	50.7469	3.6717	0	2	1	0	0	0	0.728309	0	1	0	0	TRAIN
534	2.44949	2.57143	2.50463	0	3.97067	1.91504	2.9935	4.56155	5	0.810335	4.08304	3.3151	7.81314	2.56701	3.72509	0	0	0	17.6504	17.6504	17.6504	50.7469	3.7592	0	2	1	0	0	0	0.728309	0	1	0	0	TRAIN
535	2.82843	6.44545	2.59931	0	2.12495	3.2389	2.92782	4.34292	7	0.525485	4.40128	3.27242	7.81289	2.90654	3.9318	2.4479	68.7381	0	4.64024	5.55011	5.55011	118.575	3.69744	-1.13731	2	1	0	0	0	-0.200185	0	1	0	0	TEST
536	2.54951	1.30501	4.15278	8.34383	0.908695	3.62302	1.64908	5.36608	20.7149	0.563276	5.36852	4.13292	7.81492	2.06538	5.83612	1.24665	0	0	0	103.481	103.481	50.7469	3.80981	0	2	1	0	0	1	4.39199	0	1	1	1	TRAIN
537	2.12132	1.39436	3.42976	6.41411	1.16818	4.14266	1.90896	4.963	13.661	0.628937	4.95942	3.85799	7.81491	2.16879	4.24455	1.47251	28.5566	0	11.1916	63.9025	63.9025	67.5324	3.78061	0	2	1	0	0	1	1.9072	0.2	1	1	0	TRAIN
538	2.12132	1.27678	3.58047	6.38572	1.3359	4.0374	2.02211	5.09244	14.2388	0.670079	4.96004	3.88153	7.81493	2.1705	4.24455	2.3299	28.5566	0	11.1916	63.9025	63.9025	67.5324	3.80422	0	2	1	0	0	1	1.9072	0.333333	1	1	1	TRAIN
539	3.60555	4.03755	4.33588	4.90435	1.23883	4.04243	2.46758	4.92145	12.7478	0.398055	5.03549	3.63784	7.53262	1.88668	8.22292	0.999448	50.5184	25.9236	20.6522	81.2011	81.2011	91.6793	3.77647	-0.861291	2	1	1	0	1	1.54843	1	1	1	1	TEST
540	4.69042	11.4453	3.74227	2.07944	1.62714	3.21971	3.70393	5.10015	16	0.256927	4.9915	3.18876	8.51616	3.18921	10.6543	0.68128	25.3735	19.1611	32.8704	29.8686	29.8686	134.295	4.25845	0	2	1	1	0	1	2.94835	1	1	0	1	TRAIN
541	1.73205	1.47649	3.76366	1.60944	1.76856	3.79465	2.47543	4.95961	10.056	0.564404	4.63429	3.43541	7.53248	2.35196	4.94417	3.00667	80.368	23.4369	31.9435	19.9114	19.9114	94.8244	3.84607	-1.11296	2	1	1	0	1	-0.773813	1.41421	1	1	0	TRAIN
542	1.58114	1.44612	3.53597	1.60944	1.7553	3.64022	2.35556	4.84544	9.40326	0.611247	4.55542	3.37723	7.53248	2.45981	3.97478	0	80.368	23.4369	25.6528	13.6207	13.6207	94.8244	3.78782	-1.11468	2	1	1	0	1	-1.18325	1.41421	1	1	1	TRAIN
543	3.60555	5.75991	3.06402	0	2.17226	4.05602	3.66327	4.63876	11	0.382668	4.53747	3.14616	7.529	2.29621	7.45019	1.18083	25.3735	19.1611	16.0384	13.0366	13.0366	172.585	3.0118	0	2	1	1	0	1	-1.01791	1	1	0	1	TRAIN
544	3.60555	5.50519	3.49819	0	2.17226	4.13684	3.66327	4.63876	11	0.389425	4.60175	3.23019	7.5292	2.39681	6.93709	1.14359	55.6519	19.1611	16.0384	18.1701	18.1701	155.046	3.59798	-0.222463	2	1	1	0	1	-1.12537	1	1	0	1	TRAIN
545	3.31662	4.80698	2.91846	0	2.16839	4.08878	3.49401	4.5881	10	0.406677	4.44909	3.10653	7.529	2.38354	6.77942	1.19319	25.3735	19.1611	7.2132	4.21141	4.21141	172.585	2.97751	0	2	1	1	0	1	-1.39562	1	1	0	1	TEST
546	2.54951	2.6584	5.41423	4.84714	1.00483	3.92172	1.97283	5.1749	11.7787	0.375217	5.07236	3.64578	7.52903	1.87664	8.63488	0.826744	55.223	19.1611	27.9879	77.1333	77.1333	69.6795	3.76646	0.0149528	2	1	1	0	1	1.80725	1	1	1	1	TRAIN
547	3.4641	4.8721	3.87441	0.693147	2.10785	4.0958	3.60241	4.76118	11	0.406948	4.80225	3.24655	7.53218	2.21495	11.1295	1.06142	50.5184	23.4369	28.0735	50.4854	11.3368	151.511	3.6695	-0.653056	2	1	1	0	1	-0.313366	1.41421	1	0	1	TRAIN
548	1.41421	1.7119	2.81472	0	1.73508	3.73452	2.23165	4.64198	8.75595	0.610907	4.31026	3.15205	7.52899	2.13105	4.98154	1.10532	36.3733	30.9322	11.8056	8.80379	8.80379	98.2178	3.12974	0	2	1	1	0	0	-1.0191	1	1	1	0	TRAIN
549	3.74166	5.65615	4.01997	1.09861	2.12375	4.21366	3.76791	4.79443	12	0.382684	4.86515	3.26806	7.53218	2.15084	12.014	1.60139	50.5184	23.4369	36.8987	59.3106	20.162	151.511	3.67298	-0.655972	2	1	1	0	1	0.039855	1.41421	1	0	1	TRAIN
550	3.16228	5.05447	2.88417	0	2.27977	3.97057	3.39079	4.55661	9	0.442859	4.35235	3.09598	7.529	2.21886	6.21032	1.20461	25.3735	19.1611	16.0384	13.0366	13.0366	129.901	2.95965	0	2	1	1	0	1	-0.623663	1	1	0	1	TRAIN
551	1.41421	1.25058	2.79014	0	1.95572	3.625	2.21834	4.48119	7.66743	0.665455	4.19066	3.20208	7.529	2.17041	4.48299	4.03312	25.3735	19.1611	9.74773	6.74594	6.74594	87.2179	3.02677	0	2	1	1	0	0	-0.637438	1	1	0	1	TRAIN
552	3.31662	3.80391	3.32042	0	2.58753	3.36804	3.60334	4.74722	9	0.485797	4.43984	3.25869	7.53268	2.12378	5.75025	2.74015	50.5184	23.4369	55.6551	24.0319	24.0319	102.577	3.62293	-0.80213	2	1	1	0	1	0.0808774	1	1	0	1	TEST
553	3.87298	12.5714	3.07214	2.30259	1.14335	3.2999	2.93122	4.34668	15	0.202281	4.69802	3.02703	7.52918	1.52551	9.47241	0.78634	25.3735	19.1611	39.278	44.6726	44.6726	44.5346	2.83708	0	2	1	1	0	1	4.41321	1	1	0	1	TEST
554	2.23607	1.82101	4.32678	3.44601	1.48049	3.46132	2.26765	4.8047	9.27392	0.585911	4.64673	3.62441	8.2009	2.17194	4.89508	1.18773	25.3735	34.1212	3.00179	58.1791	58.1791	59.4947	3.09266	0	2	1	1	0	1	2.1132	1	1	1	1	TRAIN
555	2.82843	2.14974	3.25841	4.44705	1.30913	3.38418	2.30011	4.86067	10.1193	0.511713	4.90295	3.68849	7.81493	2.27059	5.07839	0.804152	25.3735	19.1611	3.00179	51.8149	51.8149	95.2815	3.77834	0	4	1	1	0	1	1.67476	0.816497	1	1	0	TEST
556	2.54951	3.16657	3.00201	3.91077	1.1238	3.77206	2.04553	4.55495	9.28162	0.421893	4.64601	3.55394	7.52918	1.74642	5.78986	1.07139	25.3735	19.1611	7.64203	63.6034	63.6034	44.5346	2.8786	0	2	1	1	0	1	2.05894	1	1	1	1	TRAIN
557	4.12311	14.5714	3.11315	2.48491	1.07212	3.12489	2.94466	4.34668	17	0.17795	4.80511	3.02882	7.52918	1.50195	10.6006	0.753906	25.3735	19.1611	44.3471	49.7417	49.7417	44.5346	2.83708	0	2	1	1	0	1	4.93291	1	1	0	1	TRAIN
558	3.60555	10.5714	3.0189	2.07944	1.23983	3.49716	2.91682	4.34667	13	0.23488	4.57806	3.02463	7.52918	1.55389	8.34115	0.838888	25.3735	19.1611	34.209	39.6035	39.6035	44.5346	2.83708	0	2	1	1	0	1	3.86035	1	1	0	1	TRAIN
559	2.64575	1.97587	2.78472	0	3.25311	3.02206	3.14421	4.62865	6	0.726545	4.16984	3.21345	7.53293	2.27149	3.52605	0	50.5184	23.4369	35.899	12.6722	12.6722	102.577	3.60301	-0.851852	2	1	1	0	0	-1.30097	1	1	0	1	TRAIN
560	1.41421	0.908493	3.21528	0	2.2161	3.25163	2.30303	4.71102	7.85818	0.779256	4.31497	3.29695	7.53242	2.29685	3.28804	0	50.5184	25.9236	9.69988	13.4606	13.4606	80.6794	3.78059	-0.652778	2	1	1	0	0	-1.17364	1	1	0	1	TEST
561	3.16228	4.78728	3.36569	0	2.27977	3.78418	3.39079	4.55661	9	0.454079	4.42922	3.21076	7.5292	2.34404	5.71027	1.15645	55.6519	19.1611	16.0384	18.1701	18.1701	112.363	3.59695	-0.145324	2	1	1	0	1	-0.731123	1	1	0	1	TRAIN
562	1.73205	1.81441	2.92694	1.60944	1.58662	3.05881	2.24645	4.67925	9.18286	0.572568	4.46166	3.17187	7.53152	2.0955	5.04472	3.30711	50.7469	61.8644	14.4264	8.42282	8.42282	89.0691	3.08621	0	4	1	1	0	1	-0.274519	2.3094	1	1	1	TRAIN
563	1.22474	1.40299	2.80194	0	1.78218	3.625	2.12502	4.49889	8.14633	0.666681	4.2064	3.22945	7.52899	1.84638	4.10289	6.07863	25.3735	19.1611	9.74773	25.6984	25.6984	44.5346	2.95796	0	2	1	1	0	1	0.472372	1	1	1	1	TRAIN
564	3.4641	4.94502	3.43917	0	2.59443	3.29277	3.63084	5.13497	9	0.492864	4.47804	3.19236	8.51229	3.02785	6.11286	3.23264	25.3735	19.1611	23.7979	20.7961	20.7961	89.4149	4.26938	0	2	1	1	0	0	1.16413	1	1	0	1	TRAIN
565	1.73205	1.75952	3.2151	0	1.76113	3.30565	2.4744	4.98114	10.0907	0.519123	4.46932	3.30881	7.52899	1.66458	6.36948	1.96246	25.3735	19.1611	27.9879	30.2582	30.2582	44.5346	3.25993	0	2	1	1	0	1	0.502936	1	1	1	1	TEST
566	3.31662	4.61357	2.9818	0	2.16839	4.17574	3.49401	4.5881	10	0.412075	4.48044	3.14645	7.529	2.21365	6.39478	1.27837	25.3735	19.1611	7.2132	29.4546	29.4546	145.668	2.99608	0	2	1	1	0	1	-0.353409	1	1	0	1	TRAIN
567	3.16228	4.8479	2.9475	0	2.27977	3.97057	3.39079	4.55661	9	0.449989	4.38684	3.1401	7.529	2.00504	5.80318	1.35834	25.3735	19.1611	16.0384	38.2798	38.2798	102.985	2.97998	0	2	1	1	0	1	0.434255	1	1	0	1	TRAIN
568	3.16228	4.58168	3.41302	0	2.27977	3.78418	3.39079	4.55661	9	0.461536	4.46119	3.22804	7.5292	2.1304	5.3343	1.38332	55.6519	19.1611	16.0384	43.4133	43.4133	85.4464	3.59786	-0.0819907	2	1	1	0	1	0.337522	1	1	0	1	TRAIN
569	2.82843	3.82273	2.80194	0	2.27245	3.82687	3.17534	4.4605	8	0.486424	4.28332	3.09697	7.52899	2.11471	5.15901	1.23365	25.3735	19.1611	7.2132	29.4546	29.4546	102.985	2.93629	0	2	1	1	0	1	0.0565412	1	1	0	1	TEST
570	3.60555	5.44717	3.97843	1.09861	1.94299	4.18523	3.59795	4.76169	12	0.355182	4.6353	3.24465	7.53236	1.92041	7.68606	1.51941	50.5184	25.9236	34.9539	38.7146	38.7146	80.6794	3.76015	-0.658701	2	1	1	0	1	1.14534	1	1	0	1	TRAIN
571	1.58114	1.98826	3.59916	4.74112	1.13743	4.45859	1.91093	5.00885	11.0337	0.473832	4.8039	3.57545	7.529	1.76269	6.55607	1.48232	65.7012	19.1611	30.8059	49.9422	49.9422	61.3201	3.34202	0	2	1	1	0	1	1.1625	1	1	1	1	TRAIN
572	3.08221	2.35725	4.30802	6.35559	0.898774	4.30351	1.79147	4.80194	12.1628	0.483166	5.25656	3.88524	7.53243	1.95177	9.05255	1.00057	67.3039	24.1827	23.6574	85.2456	85.2456	86.465	3.66779	-0.602726	2	1	1	0	1	1.41507	1.5	1	1	1	TEST
573	3.4641	5.91485	3.02972	0	2.27642	3.22347	3.577	4.61803	10	0.413729	4.44929	3.13971	7.529	2.10952	6.84717	1.23647	25.3735	19.1611	24.8636	21.8618	21.8618	129.901	2.99786	0	2	1	1	0	1	-0.245949	1	1	0	1	TRAIN
574	3.4641	5.3704	3.44269	0	2.27642	2.89185	3.577	4.61803	10	0.431512	4.58472	3.27153	7.52941	2.35465	5.85622	1.05359	85.9303	19.1611	24.8636	32.1288	32.1288	94.8244	3.6388	-0.378056	2	1	1	0	1	-0.450142	1	1	0	1	TRAIN
575	4.24264	7.53954	3.46	0	2.42391	2.46924	4.05496	5.19001	12	0.407925	4.80698	3.25618	8.51643	3.27388	5.5393	0	25.3735	19.1611	22.7322	19.7304	19.7304	134.295	4.28642	0	2	1	1	0	0	1.70277	1	1	0	0	TRAIN
576	3.87298	5.28935	3.33161	4.14214	0.84151	4.63129	2.07338	4.76371	11.837	0.315605	5.27226	3.59795	7.5293	1.79331	12.3911	1.05957	78.7216	23.8169	109.749	85.5503	85.5503	109.165	4.25329	0.147269	2	1	1	0	1	0.851502	1.61099	1	0	0	TRAIN
577	3.16228	5.98934	3.19269	0.693147	1.88702	3.21971	3.25134	4.47109	10	0.362851	4.36375	3.05358	7.52898	1.61526	6.63434	1.68141	25.3735	19.1611	35.0017	31.9999	31.9999	44.5346	2.90648	0	2	1	1	0	1	2.03629	1	1	0	1	TRAIN
578	2.82843	4.0273	2.73861	0	2.27245	2.98477	3.17534	4.4605	8	0.477026	4.245	3.02668	7.529	2.32812	5.54895	1.25443	25.3735	19.1611	7.2132	4.21141	4.21141	129.901	2.9128	0	2	1	1	0	0	-1.0331	1	1	0	1	TRAIN
579	2.44949	2.28938	2.64306	0	2.93297	2.46924	2.9923	4.41421	6	0.617186	3.98459	3.00309	7.52899	1.7425	4.31073	0	25.3735	19.1611	24.8636	21.8618	21.8618	44.5346	2.88546	0	2	1	1	0	0	0.562392	1	1	0	1	TEST
580	2	3.57143	2.18056	0	3.91556	1.55314	2.53954	4.17009	4	0.879425	3.73034	2.91817	7.52937	2.00883	3.07805	0	25.3735	19.1611	3.00179	16.7928	16.7928	44.5346	2.76696	0	2	1	1	0	0	-0.410018	1	1	0	1	TRAIN
581	2.23607	2.08875	3.78186	5.66837	1.05749	2.90347	1.88449	5	10.2909	0.488081	4.95663	3.65549	7.52917	1.83452	5.66874	1.58676	25.3735	19.1611	3.00179	100.276	100.276	44.5346	3.26034	0	2	1	1	0	1	3.22262	1	1	1	1	TRAIN
582	1.87083	2.48554	3.20569	5.70274	0.822505	3.65366	1.66707	4.7225	10.1698	0.431673	4.95811	3.65652	7.52862	1.80269	5.66874	0.300684	25.3735	19.2836	18.0108	93.5565	93.5565	44.6571	2.94349	0	1	1	0	0	1	2.67862	0	1	1	1	TRAIN
583	2.82843	4.09973	2.96083	0	2.27245	2.8927	3.17534	4.4605	8	0.460306	4.1919	3.0373	7.52898	1.71263	5.48383	1.50841	25.3735	19.1611	29.9327	26.9309	26.9309	44.5346	2.90366	0	2	1	1	0	1	1.34954	1	1	0	1	TEST
584	1.22474	1.96597	2.80917	0	1.78218	2.80735	2.12502	4.49889	8.14633	0.907451	4.67786	3.15259	7.52898	1.78928	10.6203	5.49468	25.3735	89.7877	3.94352	65.3808	65.3808	44.5346	4.67835	0	2	1	1	0	1	-0.282691	1	1	1	0	TRAIN
585	1.22474	6.61728	3.52078	2.99573	1.05749	2.68259	2.17467	4.47438	18.2147	0.307618	4.66159	3.08136	7.52898	1.58196	8.64775	1.03906	25.3735	19.1611	32.5585	29.5567	29.5567	44.5346	2.90703	0	2	1	1	0	1	2.83739	1	1	0	1	TRAIN
586	3.24037	2.61852	3.85	4.17631	1.37453	4.08362	2.4092	5.01143	10.2078	0.418658	4.80134	3.59773	7.5292	1.9012	7.02626	0.776252	25.3735	19.1611	11.827	67.7884	67.7884	87.2179	3.35025	0	2	1	1	0	1	1.5545	1	1	1	1	TRAIN
587	2.23607	2.57143	2.41181	0	3.13516	2.98523	2.75418	4.30278	5	0.709203	3.86535	2.96493	7.52918	1.8529	3.70662	0	25.3735	19.1611	13.9327	19.3273	19.3273	44.5346	2.82556	0	2	1	1	0	0	0.109309	1	1	0	1	TRAIN
588	3.16228	3.09512	3.61528	0	2.48324	3.64644	3.52993	4.75047	9	0.51069	4.43631	3.23787	7.53237	2.0913	5.71027	0.690755	50.5184	25.9236	27.3503	31.111	31.111	80.6794	3.7591	-0.694444	2	1	1	0	1	0.0808774	1	1	0	1	TRAIN
589	2.44949	2.21553	3.96745	2.89037	1.47243	3.97057	2.34443	4.84172	10.0176	0.481088	4.66551	3.47918	7.52905	2.0825	5.9889	0.979232	57.7097	19.1611	9.74773	37.4822	37.4822	80.6794	3.68889	0.117315	2	1	1	0	1	0.323079	1	1	1	0	TRAIN
590	1.22474	2.81346	3.10086	1.94591	1.45592	3.02206	2.16106	4.48119	11.0069	0.485694	4.31475	3.09336	7.52898	1.72345	5.75159	2.35738	25.3735	19.1611	19.8859	16.8841	16.8841	44.5346	2.90833	0	2	1	1	0	1	1.31077	1	1	0	1	TRAIN
591	1.58114	0.988866	3.31597	0	2.03701	3.4183	2.37944	4.71134	8.38492	0.70778	4.49118	3.41428	7.53287	2.54202	2.80031	0	80.368	23.4369	23.1182	11.0862	11.0862	94.8244	3.85073	-1.255	2	1	1	0	0	-1.63633	1.41421	1	0	1	TEST
592	2.34521	1.59856	3.36477	1.94591	1.85596	4.0374	2.50036	4.90718	9.35332	0.540835	4.58403	3.39921	7.5295	2.52028	5.51855	1.91931	94.1116	19.1611	7.64203	5.55011	5.55011	155.046	3.80054	-1.12394	2	1	1	0	0	-1.08308	1	1	0	0	TRAIN
593	3.4641	5.29643	2.91661	0	2.27642	3.02864	3.577	4.61803	10	0.443526	4.62382	3.25073	7.53	2.66784	4.9193	0.445233	162.85	19.1611	7.2132	6.03116	6.03116	180.191	3.66882	-2.60028	2	1	1	0	0	-1.14439	1	1	0	0	TRAIN
594	3	4.0273	2.66889	0	2.2822	3.78714	3.22305	4.5231	8	0.475777	4.26981	3.08357	7.52919	2.31191	5.54895	1.24305	25.3735	19.1611	5.1075	10.5021	10.5021	129.901	2.9206	0	2	1	1	0	1	-1.0331	1	1	0	1	TRAIN
595	2.44949	3.36051	2.45958	0	2.45966	3.32323	2.83182	4.3342	6	0.588514	4.02026	2.98082	7.52918	2.21694	4.31605	0.944752	25.3735	19.1611	5.1075	10.5021	10.5021	87.2179	2.84028	0	2	1	1	0	0	-0.698521	1	1	0	1	TEST
596	2.64575	4.53247	2.60499	0	2.04896	3.57243	2.86207	4.34292	7	0.48374	4.12579	2.99696	7.52918	2.11224	4.96424	1.65807	25.3735	19.1611	7.64203	13.0366	13.0366	87.2179	2.83762	0	2	1	1	0	1	-0.245438	1	1	0	1	TRAIN
597	2.82843	4.24675	3.1725	0	2.4512	3.28064	3.09883	4.47635	7	0.552163	4.246	3.20102	7.52939	2.24455	4.48299	1.00828	55.6519	19.1611	13.9327	24.4608	24.4608	69.6795	3.59352	-0.0628704	2	1	1	0	1	-0.352898	1	1	0	1	TRAIN
598	2.12132	1.60013	2.94121	3.44601	1.6075	3.80776	2.23954	4.77442	8.7761	0.654718	4.53776	3.53386	7.52928	1.85417	4.23434	1.3419	53.9301	21.489	12.0492	48.2005	48.2005	61.3201	3.06001	0	2	1	1	0	1	0.935157	1.41421	1	1	1	TEST
599	2.12132	1.60013	2.95343	3.44601	1.6075	3.80776	2.23954	4.77442	8.7761	0.647392	4.53729	3.54218	7.52927	1.85088	4.23434	1.27891	65.7012	19.1611	21.0966	48.2005	48.2005	61.3201	3.06001	0	2	1	1	0	1	0.123157	1.1547	1	1	0	TRAIN
600	2.12132	1.60013	2.9608	3.44601	1.6075	3.33718	2.23954	4.77442	8.7761	0.641301	4.53727	3.54463	7.52927	1.85267	4.23434	1.57408	65.7012	19.1611	21.0966	48.2005	48.2005	61.3201	3.06001	0	2	1	1	0	1	0.123157	1	1	1	0	TEST
601	2.12132	1.63296	2.98121	3.44601	1.6075	3.30827	2.23954	4.77442	8.7761	0.631225	4.52073	3.5685	7.52927	1.83528	4.4111	1.53946	25.3735	19.1611	3.00179	58.5344	58.5344	44.5346	3.06001	0	2	1	1	0	1	1.67621	1	1	1	1	TRAIN
602	3.74166	11.4982	3.04737	2.19722	1.18758	3.39603	2.92412	4.34668	14	0.217296	4.63983	3.02593	7.52918	1.53292	8.90725	0.809249	25.3735	19.1611	36.7435	42.1381	42.1381	44.5346	2.83708	0	2	1	1	0	1	4.14139	1	1	0	1	TEST
603	1.22474	1.52673	2.78028	0	1.78218	2.75	2.12502	4.49889	8.14633	0.655746	4.17144	3.08264	7.52898	1.86957	4.48299	0	36.3733	19.1611	16.398	13.3962	13.3962	55.5344	2.9485	0	2	1	1	0	0	-0.637438	1	1	1	1	TRAIN
604	1.73205	1.81586	4.0314	4.87329	1.1368	4.40386	1.92025	4.99229	10.6583	0.493138	4.84477	3.62233	7.52902	2.00368	6.35524	1.30223	52.9622	19.1611	28.2714	47.4077	47.4077	71.3707	3.3615	0	3	1	1	0	1	0.883447	0.894427	1	1	1	TEST
605	2.23607	1.82101	3.4831	1.79176	1.77859	4.01137	2.44297	4.95295	9.93994	0.525511	4.54622	3.34795	7.52948	2.30401	5.85622	2.27812	94.1116	19.1611	12.7111	10.6192	10.6192	112.363	3.78869	-0.954352	2	1	1	0	1	0.066591	1	1	1	0	TEST
606	1.22474	1.52673	2.80806	0	1.78218	2.91099	2.12502	4.49889	8.14633	0.639487	4.15184	3.0858	7.52898	1.79347	4.51227	5.66991	25.3735	19.1611	29.4354	8.42282	8.42282	44.5346	2.92512	0	2	1	1	0	0	-0.637438	1.1547	1	1	1	TRAIN
607	1.22474	1.54893	2.83583	0	1.78218	2.9477	2.12502	4.49889	8.14633	0.626185	4.13428	3.10683	7.52898	1.78574	4.54649	6.58044	25.3735	19.1611	14.8168	11.815	11.815	44.5346	2.91522	0	2	1	1	0	1	0.579831	1	1	1	1	TRAIN
608	2.23607	1.39447	3.33032	1.94591	1.91577	3.83659	2.417	4.90641	8.7708	0.582357	4.48087	3.36346	7.52949	2.41121	5.0991	0.700179	94.1116	19.1611	10.1766	8.08464	8.08464	112.363	3.79208	-0.961019	2	1	1	0	0	-0.311123	1	1	0	0	TRAIN
609	1.22474	0.967262	2.68306	0	2.17206	2.57356	2.13996	4.41421	7.14792	0.745035	4.03375	3.11817	7.52899	1.86972	3.91797	0	25.3735	19.1611	12.2823	9.28047	9.28047	44.5346	2.92732	0	2	1	1	0	0	0.170392	1	1	0	1	TRAIN
610	1.73205	2.1056	3.33667	1.60944	1.84786	3.29466	2.51579	5.00445	10.2086	0.718062	4.88694	3.38378	7.52901	1.65713	13.6908	0.65181	25.3735	54.4744	29.4774	90.9147	90.9147	44.5346	5.04781	0	2	1	1	0	1	0.957545	1	1	1	1	TRAIN
611	1.22474	1.75344	2.82657	0	1.78218	2.75	2.12502	4.49889	8.14633	0.722148	4.44144	3.12799	7.52898	1.77622	8.10937	0	25.3735	19.1611	9.01258	38.2303	38.2303	44.5346	4.21477	0	2	1	1	0	0	0.170392	1	1	1	1	TRAIN
612	1.41421	1.13905	2.97731	2.78424	1.89371	3.57782	2.29726	4.78289	8.92094	0.732526	4.4418	3.64544	7.52859	1.87914	3.82526	1.78576	25.3735	19.2836	8.8252	52.6725	52.6725	44.6571	3.07379	0	1	1	0	0	1	1.69999	0	1	1	1	TEST
613	1.41421	0.894917	1.07688	7.26977	1.17226	4.29708	1.76163	5.0135	17.7493	0.727287	4.93349	4.00571	4.95392	1.7135	4.43696	1.06034	40.3277	4.28827	34.8804	74.9103	74.9103	16.7855	3.19511	0	0	1	0	0	1	1.30515	0	0	1	0	TRAIN
614	3.87298	4.38026	5.6344	6.35345	0.653019	5.09944	1.63675	5.30131	14.8848	0.268145	5.66168	3.88282	7.47731	2.12926	16.2697	1.15414	173.607	0	31.905	138.949	99.8005	210.95	3.816	-2.85388	0	1	0	1	1	3.20842	0	0	1	1	TRAIN
615	3	2.99621	1.80821	4.99594	1.75514	3.20282	2.90257	5.31701	13.0872	0.579158	5.84133	3.92828	5.22271	1.79577	15.2365	0.703125	3.50061	78.2973	0	341.194	28.0049	313.189	3.78518	-0.265072	0	0	0	1	0	6.15731	0	0	1	0	TRAIN
616	1.41421	1.77538	1.48815	5.22608	1.19433	3.89241	1.91743	5.00398	10.2356	0.62431	5.28414	3.76118	4.9029	1.61881	13.4572	1.22257	70.4351	0	38.7242	149.016	149.016	78.7631	4.61454	3.23542	0	1	0	0	1	1.27961	0	0	1	0	TRAIN
617	3.16228	3.33196	5.68026	6.97179	0.626495	4.61186	1.53027	5.09287	13.3782	0.381479	5.61319	3.89442	7.39575	1.74245	14.4298	0.923623	67.4986	2.14414	49.977	121.521	121.521	77.7273	4.79909	0	0	1	0	0	1	1.12577	0	1	1	1	TRAIN
618	4	4.92001	4.33751	1.60944	2.09609	3.75416	3.89858	4.89235	13	0.438294	4.97028	3.46143	7.43562	1.92964	11.2801	0.992024	56.1164	6.7625	40.5349	77.1881	77.1881	80.9085	4.56831	-0.88601	1	1	0	0	1	-0.462878	0.471405	1	0	0	TRAIN
619	1.87083	2.52465	4.73743	6.60504	0.929953	4.60726	1.78943	5.12483	16.2742	0.429604	5.37721	3.81697	7.42897	1.95096	11.6749	1.40341	32.6063	11.7711	34.7963	135.049	95.8999	123.762	3.79558	-0.0199504	0	1	0	1	1	3.11616	0	0	1	0	TRAIN
620	2.64575	1.69248	5.21326	6.99651	0.864501	4.32316	1.68116	5.04267	16.8088	0.442227	5.18757	3.94061	7.43154	1.97987	6.52943	1.09683	60.128	0	26.836	100.496	100.496	50.2899	3.69262	-0.119711	0	1	0	0	1	2.7186	0	0	1	1	TRAIN
621	2.73861	1.82174	5.14738	6.5888	0.959835	4.54839	1.80192	5.26929	17.4669	0.448277	5.21471	3.8597	7.48302	2.07734	7.53979	1.39484	99.0165	35.3133	17.5811	71.2392	71.2392	114.973	3.78655	-1.98104	0	1	0	0	1	0.944774	0	0	1	1	TRAIN
622	3.74166	5.41429	3.97886	1.38629	2.12375	4.05596	3.76791	4.79443	12	0.388836	4.91188	3.3109	7.53243	2.235	11.1939	1.50947	80.7968	23.4369	36.8987	64.4441	25.2955	133.973	3.72727	-1.03567	2	1	1	0	1	-0.056878	1.41421	1	0	0	TRAIN
623	3.31662	3.53221	3.26917	0	2.58753	3.57247	3.60334	4.74722	9	0.507762	4.53089	3.30255	7.53295	2.41348	4.86522	2.31063	80.7968	23.4369	46.8299	20.3402	20.3402	127.722	3.69835	-1.37167	2	1	1	0	1	-1.19725	1	1	0	0	TEST
624	2.34521	1.39347	4.19886	5.21697	1.14613	4.1066	1.89157	4.94401	12.1836	0.548454	4.82667	3.7416	7.42782	1.92105	5.13365	0.672902	30.2784	23.5422	6.65024	79.1281	79.1281	62.9116	3.50281	-0.112685	0	0	0	0	0	1.47042	0	0	1	0	TEST
625	1.73205	2.63608	2.07722	5.66837	0.832833	3.05118	1.68123	4.73205	10.2277	0.449309	4.93582	3.66749	4.89484	1.70844	6.28346	1.34549	0	0	0	91.8103	91.8103	76.7943	3.07568	0	0	1	0	0	1	2.21441	0	0	1	1	TRAIN
626	2.23607	3.65596	1.79569	3.21888	0.874548	3.34129	1.71604	4.83034	10.0392	0.459875	5.09637	3.38562	4.73953	1.51643	15.8448	0.729994	21.9998	0	31.4352	103.965	103.965	67.1918	4.58843	0.972407	0	1	0	0	1	-0.470332	0	0	1	1	TEST
627	3.87298	4.85446	3.50417	5.3799	1.13583	3.76532	2.41779	5.28632	12.0854	0.458043	5.53133	3.7032	7.81491	1.94592	15.7309	0.496622	25.5028	0	26.8352	125.559	113.9	112.671	3.77843	0	2	1	0	0	1	2.22287	0	1	1	0	TRAIN
628	1.41421	1.01178	3.64889	4.30407	1.53214	3.96982	2.03491	4.96444	13.1376	0.656745	4.64301	3.66045	7.43332	2.13902	4.45346	1.50639	48.5796	11.7711	4.59238	39.1652	39.1652	89.828	3.72053	0.394259	0	0	0	0	0	0.428743	0	0	1	0	TRAIN
629	2	2.00488	1.68029	2.78424	1.94026	3.03064	2.78724	5.25201	11.6809	0.701191	5.48586	3.88007	5.19704	1.75442	18.3027	1.59857	0	0	0	229.373	33.6295	206.743	3.77002	0	0	0	0	1	0	4.18977	0	0	1	1	TRAIN
630	3	3.96703	1.02392	0	4.65633	1.40564	3.5412	5.2618	6	0.995155	5.17403	3.36793	5.20238	1.64107	10.1106	0	0	129.217	0	195.743	0	195.743	3.91883	0	0	0	0	0	0	2.95734	0	0	0	0	TEST
631	3.87298	5.98452	3.19468	1.79176	1.95183	4.20841	3.73954	4.79111	13	0.352192	4.85474	3.33899	7.81704	2.24257	7.61362	1.29258	25.3735	21.0602	71.0965	20.4336	20.4336	126.953	3.64272	-0.61009	4	1	1	0	1	1.49517	2.37841	1	0	0	TRAIN
632	3.16228	3.9116	5.85785	5.03695	0.841072	5.18045	1.88862	5.53986	22.4451	0.296774	5.47477	3.64922	7.43733	1.9928	14.2923	1.08841	105.951	0	43.4728	80.9228	80.9228	151.118	4.35136	-1.55826	0	1	0	0	1	0.42197	0	0	0	1	TEST
633	2.64575	3.36201	3.68143	4.48582	1.1513	3.95006	2.14713	4.68655	10.0107	0.448309	4.73607	3.61586	7.43049	1.75387	6.43558	0.783132	29.8496	0	40.2535	72.8526	72.8526	36.1448	3.53276	-0.0655927	0	1	0	0	1	1.68033	0	0	1	1	TRAIN
634	1.58114	1.51071	4.60343	5.27332	1.24081	3.92103	2.0049	5.08012	10.7404	0.52548	4.87169	3.66832	7.42809	1.77545	6.13158	0.832609	32.6063	0	14.8288	84.2972	84.2972	25.1449	3.74511	0.967642	1	1	1	0	1	2.30588	0	0	1	1	TEST
635	5.56776	7.50151	6.03032	6.37001	0.336515	5.50923	1.09505	5.69441	17.9624	0.152766	5.97105	3.70941	7.43105	1.5479	33.7596	0.975084	32.3363	0	84.4509	226.449	148.151	114.442	3.8591	1.48425	0	1	0	0	1	7.93554	0	0	1	1	TRAIN
636	2.12132	3.08082	0.83189	4.15006	1.10761	3.58418	1.95831	4.5216	8.91463	0.465823	4.80967	3.55576	5.14263	1.63844	8.31545	1.36467	13.9457	0	21.4258	114.345	114.345	61.9776	3.29921	0	0	1	0	0	1	3.6476	0	0	1	0	TEST
637	2.44949	1.69635	4.97579	5.26301	1.30865	3.97833	2.20368	5.69717	11.9984	0.442217	5.07861	3.74275	7.46047	2.12837	7.23441	0.982577	84.8441	4.27582	47.3812	75.6117	75.6117	75.4348	4.4345	-1.90286	0	1	0	0	1	0.778917	0	0	1	0	TEST
638	0.707107	1.0171	2.63222	0	2.02243	2.87314	2.12292	4.41421	7.8978	0.896173	4.14894	3.53835	6.31274	1.9322	3.09293	0	42.6833	0	0	47.3812	47.3812	42.6833	2.6279	0	0	0	0	0	0	1.50592	0	0	1	0	TEST
639	2.54951	2.20752	5.44066	7.17945	0.807991	4.04767	1.63998	5.71385	13.4415	0.389384	5.45941	3.90589	7.43284	2.00351	8.70914	0.692968	117.703	0	0	133.649	133.649	121.512	4.37139	-0.396528	0	0	0	0	0	3.23323	0	0	1	1	TRAIN
640	2.34521	2.91695	0.956667	4.27493	1.20863	3.17467	2.04692	4.5433	8.95375	0.547768	4.57637	3.56264	4.9278	1.51379	5.14312	0.862767	0	33.2035	3.00179	66.9307	66.9307	33.2035	2.66577	0	2	1	1	0	1	2.00973	1.41421	0	1	1	TRAIN
641	1.41421	1.5103	4.39649	5.18913	1.18737	3.76227	1.91032	4.95042	10.1767	0.551732	4.8088	3.63959	7.42652	1.81126	5.41781	1.00657	32.6063	0	31.0245	68.9591	68.9591	41.8079	3.82005	0.914401	1	1	1	0	1	1.74642	1	0	1	0	TRAIN
642	1.73205	2.19531	0.896037	6.7842	0.707876	3.93624	1.47624	4.93343	12.9303	0.433994	5.10074	3.85737	4.72856	1.65219	6.33866	1.04739	0	0	18.0108	124.374	124.374	0	2.97921	0	0	1	0	0	1	4.27856	0	0	1	0	TEST
643	3.4641	4.97679	3.51561	5.98912	0.75738	4.68418	1.76336	5.00614	11.2927	0.291731	5.23367	3.73419	7.47654	1.87173	9.3219	0.821948	109.066	0	28.233	114.51	114.51	84.6138	3.59567	0.42458	0	1	0	0	1	2.92679	0	0	1	0	TRAIN
644	2.12132	2.58481	1.2448	3.8408	1.43499	3.46132	2.13128	4.59286	8.69439	0.590317	4.73831	3.56174	5.02799	1.6887	7.98167	1.1391	0	0.284521	50.9079	95.6145	95.6145	78.0892	3.73865	0.297407	0	1	0	0	1	1.29399	0	0	1	0	TRAIN
645	2.12132	2.37096	3.9328	7.00955	0.72001	4.16824	1.53696	5.12153	13.7295	0.431838	5.23469	3.90625	6.31336	1.80272	6.79298	1.63059	42.6833	33.326	0	114.898	114.898	76.0094	3.21579	0	1	1	1	0	1	3.56637	0	0	1	1	TRAIN
646	2.54951	2.96022	5.86939	6.27406	0.854335	4.02476	1.77871	5.19007	12.386	0.352886	5.34449	3.71979	7.44298	1.8562	10.0768	1.85406	59.6992	0	22.4324	126.114	126.114	50.2899	4.13709	-0.28055	1	1	1	0	1	3.6993	0	0	1	1	TEST
647	1	1.31083	1.37111	0	1.84795	2.25	2.19238	4.56155	8.30668	0.78333	4.27386	3.6068	4.87777	1.70822	3.709	4.63909	0	0	0	43.4185	43.4185	65.7944	2.6462	0	0	1	0	0	1	0.893132	0	0	1	0	TRAIN
648	3.31662	5.22951	4.63833	5.58924	0.581127	4.83418	1.5395	4.86829	11.5688	0.257279	5.29479	3.70603	7.43283	1.86823	9.79747	1.3493	75.0196	0	7.12692	131.578	131.578	89.828	3.56911	-0.400025	0	0	0	0	0	3.04695	0	0	1	0	TRAIN
649	1.73205	2.33212	1.90491	3.91077	0.925331	3.6897	1.59141	4.5433	7.61188	0.522405	4.59489	3.54281	4.70351	1.6223	5.17334	0.86196	10.9999	0	9.18477	61.8094	61.8094	21.9998	3.15908	0	0	0	0	0	0	1.23709	0	0	1	1	TRAIN
650	1.22474	1.60338	3.56395	5.76813	1.16374	3.51837	1.88483	4.98514	10.6534	0.550336	4.80535	3.75517	6.31232	1.84194	5.11159	1.11434	42.6833	0	0	91.6574	91.6574	42.6833	3.06401	0	0	0	0	0	0	3.12698	0	0	1	1	TRAIN
651	2.64575	1.76647	3.74065	3.8408	1.77563	3.12193	2.54087	5.03967	10.5148	0.561549	4.75354	3.73682	7.44424	2.17701	4.98382	1.68597	59.6992	0	65.7944	53.6854	53.6854	116.084	3.62247	-1.29741	0	1	0	0	1	0.571995	0	0	1	0	TRAIN
652	1.41421	0.785311	3.83287	4.96109	1.60593	2.97356	2.07211	4.9816	13.3639	0.714075	4.72702	3.78489	7.45648	2.23429	3.21237	3.49654	64.6725	0	0	58.6588	58.6588	61.2897	3.9082	-1.10074	0	0	0	0	0	2.19183	0	0	1	0	TRAIN
653	2.34521	1.92363	3.53328	3.1689	1.81691	3.875	2.70075	5.17575	11.3576	0.642855	5.2949	3.82631	7.4785	2.08765	13.1671	1.92674	85.5237	42.2204	2.75675	133.942	16.4964	234.957	3.69144	-1.30994	0	1	0	1	1	1.11911	0	0	1	0	TRAIN
654	2.12132	2.01126	4.3845	4.63715	1.03174	4.45388	1.88023	4.94844	10.401	0.402501	4.88902	3.60464	7.43122	1.74957	7.68155	0.725478	81.2826	2.75675	38.0518	54.4971	54.4971	52.9303	3.84656	-0.0373441	0	1	0	0	1	1.54433	0.5	0	0	0	TEST
655	3.74166	11.0509	5.37507	5.87493	0.481458	5.96406	1.46899	5.39832	28.1889	0.17123	5.97895	3.52414	7.47682	2.01822	25.0698	0.741829	145.074	11.7711	63.2203	133.546	133.546	394.287	3.89042	-1.88809	0	1	0	0	1	-0.482763	0	0	1	0	TRAIN
656	0	1.28167	0.722222	0	2.05599	1.75	2	4	7.5	0.732589	3.70067	2.92655	3.91713	1.38175	3.57553	0	0	0	44.4443	8.42282	8.42282	0	2.27797	0	0	1	0	0	0	-0.472828	0	0	1	0	TRAIN
657	0	1.30743	0.784722	0	2.05599	2.79335	2	4	7.5	0.706186	3.67297	2.96701	3.78094	1.36497	3.48024	0	0	0	29.8258	11.815	11.815	0	2.16516	0	0	1	0	0	0	0.817401	0	0	1	0	TRAIN
658	3.87298	6.82141	2.2494	5.49074	0.542186	4.5648	1.51789	5.018	13.9593	0.2223	5.23683	3.75497	4.90026	1.51954	13.376	1.15776	32.9997	23.5422	61.9931	97.8036	97.8036	54.9994	3.37592	0	0	0	0	0	0	2.10976	0	0	1	1	TRAIN
659	3.937	5.79323	5.32517	5.46859	0.595991	4.69366	1.56432	4.90598	12.4683	0.259246	5.38215	3.70757	7.3942	1.66303	16.0494	0.960601	22.1565	23.5422	42.9421	104.176	104.176	44.1563	4.76701	0	0	0	0	0	0	4.29454	0	1	1	0	TRAIN
660	3.16228	2.582	5.50191	6.48949	0.802288	4.85021	1.73567	5.63367	15.2446	0.400391	5.70304	3.98168	7.71515	2.15773	12.2561	1.18522	148.159	2.32792	28.5767	104.111	104.111	128.927	4.75511	-1.51159	0	1	0	0	1	0.942436	0.516398	1	1	0	TRAIN
661	1.87083	0.550426	3.32986	0	3.15023	2.60624	2.42522	5.41421	6.07257	0.808694	4.12664	3.50903	7.43268	2.00121	3.97217	0	32.3363	0	22.2428	29.4341	29.4341	36.1448	4.09925	-0.0763889	0	0	0	0	0	0.603611	0	0	0	1	TRAIN
662	3.87298	7.03366	3.85762	4.93986	0.848497	4.52183	2.08584	4.69478	12.3734	0.275399	5.05841	3.61718	7.43049	1.77502	10.2027	1.4301	29.8496	0	69.1952	83.7835	83.7835	78.8282	3.53277	-0.107546	0	1	0	0	1	1.19272	0	0	1	0	TEST
663	2.23607	3.07643	5.58794	6.72485	0.742675	4.70306	1.54773	5.19787	14.7216	0.375382	5.48501	3.82497	7.42611	1.81048	14.041	1.23736	32.6063	0	29.1903	144.329	105.18	81.0791	3.78958	0.903843	0	1	0	1	1	4.05263	0.333333	0	1	0	TRAIN
664	2.54951	2.74906	5.84038	5.96559	0.660134	4.6714	1.45948	5.2393	16.7606	0.319096	5.28926	3.71458	7.43028	1.81397	11.0402	1.10694	59.6992	0	27.7729	75.2097	75.2097	50.2899	3.91155	0.320062	0	1	0	0	1	2.59115	0	0	1	0	TRAIN
665	5.56776	6.28969	6.51363	6.40015	0.331355	5.82956	1.08783	5.91339	17.7126	0.150799	6.03789	3.78198	7.4354	1.8968	32.1732	1.16164	92.8931	0	52.4296	223.647	145.349	250.099	4.30701	0.110239	0	1	0	0	1	3.87932	0	0	1	1	TEST
666	4	2.17837	5.3504	6.04501	0.78238	5.35656	1.67657	5.91306	21.9068	0.305367	5.4112	3.77963	7.42994	2.05576	13.3876	1.09832	60.5568	0	30.3231	72.2043	72.2043	178.34	4.304	0.571628	0	0	0	0	0	1.52789	0	0	1	1	TRAIN
667	4.12311	3.86865	5.37188	4.78017	1.25746	3.99767	2.60867	5.50948	12.6165	0.431918	5.48395	3.87096	7.71477	2.20688	13.864	0.858135	113.051	0	28.4494	76.2895	76.2895	112.141	4.72511	-1.06674	0	1	0	0	1	1.97873	0	1	1	0	TRAIN
668	3.31662	4.4552	4.64135	4.69135	1.03984	4.20744	2.20185	4.84058	11.2348	0.345022	4.89704	3.66954	7.42831	1.66957	8.28702	0.495973	29.8496	0	73.5433	77.1333	77.1333	25.1449	3.56848	-0.0248836	0	1	1	0	1	1.989	0	0	1	1	TRAIN
669	1.73205	1.14439	3.20833	0	3.05856	3.08506	2.39971	5.16425	7.34005	1.40602	4.89867	3.66096	7.71929	2.59834	7.53879	0	52.8584	0	8.02661	15.7764	15.7764	52.8584	5.1282	0	0	0	0	0	0	-0.79615	0	1	0	1	TRAIN
670	0.707107	0.306499	2.67708	0	3.32712	2.72548	2.07967	4.48119	5.04413	1.11164	3.81305	3.24863	7.43212	2.27619	2.57674	0	32.3363	0	7.12692	14.3182	14.3182	36.1448	3.72643	-0.0648148	0	0	0	0	0	-0.258911	0	0	0	1	TRAIN
671	2.82843	2.84195	4.29323	3.99705	1.29862	3.95823	2.42347	5.0305	11.5344	0.425212	4.91238	3.76971	7.43253	2.18219	7.39436	0.841377	160.386	0	15.9521	45.2815	45.2815	164.195	3.66808	-0.650509	0	0	0	0	0	1.02683	0	0	1	0	TEST
672	3.60555	4.3213	3.01042	0	2.29183	3.78494	3.75812	4.7895	11	0.479252	4.75622	3.40041	7.82075	2.2695	6.06052	1.58584	25.3735	21.0602	66.0274	15.3645	15.3645	144.842	3.66042	-0.502917	5	1	1	0	1	0.708016	2.37841	1	0	1	TEST
673	3	2.90173	3.17486	0	2.65822	3.57243	3.41009	4.70489	8	0.533908	4.34286	3.23105	7.53268	2.18283	5.06957	1.96155	50.5184	23.4369	49.3644	17.7413	17.7413	102.577	3.61973	-0.799213	2	1	1	0	1	-0.328562	1	1	0	1	TRAIN
674	1	1.74026	0.361111	0	0	2.06717	1.63299	3	2	1.09375	3.08226	2.87206	4.2965	1.30878	1.67775	0	0	0	8.8252	34.0684	34.0684	15.7669	1.39622	0	0	0	0	0	0	1.21888	0	0	0	0	TEST
675	2	3.92208	2.11111	0	3.91556	3.18083	2.53954	4.17009	4	0.70207	3.55199	2.91635	6.32314	2.32097	3.51686	0	0	0	8.8252	8.8252	8.8252	85.3667	2.5273	0	0	0	0	0	0	-0.533911	0	0	0	0	TRAIN
676	0.707107	0.961039	1.20833	0	0	2.64644	2.1711	4	4.31671	1.18644	3.52651	3.13757	4.55551	1.46354	2.47773	0	10.9999	0	13.4176	13.4176	13.4176	10.9999	3.05003	0	0	0	0	0	0	-0.0451215	0	0	0	1	TEST
677	1.87083	2.49925	3.84371	2.30259	1.52751	3.97542	2.30299	4.76802	9.74479	0.520279	4.78681	3.51782	7.42878	1.82942	9.12728	1.2494	32.6063	0.284521	49.9158	76.3085	76.3085	70.337	3.84809	1.18	0	1	0	0	1	0.830573	0	0	1	1	TRAIN
678	4	4.43996	6.39222	7.26617	0.713003	5.03064	1.69991	5.42529	19.3528	0.280161	5.70598	3.87404	7.42702	1.81576	16.736	1.12558	29.8496	23.5422	53.3576	128.614	128.614	165.511	3.87025	-0.359242	0	1	1	0	1	0.87118	0	0	1	0	TRAIN
679	2.12132	1.62048	3.2717	0	1.64763	3.85217	2.39563	4.89545	9.72361	0.607247	4.66824	3.71866	7.47826	2.42801	4.45346	1.01952	154.105	0	0	32.5242	32.5242	153.195	3.58177	-1.13861	0	0	0	0	0	0.592378	0	0	1	0	TRAIN
680	2.12132	1.46878	5.24435	6.87517	1.07578	4.06026	1.91527	5.41601	19.7355	0.475524	5.27015	3.9674	7.43559	2.30488	6.07366	1.38587	188.607	0	0	70.3905	70.3905	178.34	3.82774	-1.16028	0	0	0	0	0	1.50796	0	0	1	1	TEST
681	1.87083	1.30642	3.32065	0	1.76418	3.52164	2.22836	4.73205	8.47908	0.717819	4.47186	3.56026	7.43924	2.03583	3.3846	1.2095	98.7339	0	62.7962	34.6037	34.6037	91.6132	3.49827	-0.552685	0	1	0	0	1	-1.47256	0	0	1	0	TRAIN
682	2	2.44326	1.90375	6.19345	1.08032	4.28173	2.00753	5.15379	12.0236	0.459444	5.20717	3.81103	5.1388	1.73298	11.9492	0.98423	33.5711	4.22701	16.0156	105.269	66.1202	138.514	3.23854	0	0	1	0	1	1	3.0484	0	0	1	0	TRAIN
683	1.73205	1.61323	2.8732	0	1.46311	3.5	2.17383	4.64119	8.94639	0.628538	4.54239	3.61685	7.52862	2.03208	4.04489	0.511698	39.8462	19.2836	0	43.4185	43.4185	87.4627	3.62459	0	1	1	0	0	1	0.783157	0	1	1	1	TRAIN
684	2.91548	2.99362	4.11913	7.19498	0.684421	4.7391	1.58659	5.12568	14.7236	0.37281	5.4768	3.91055	7.81492	2.02941	8.30901	1.82226	42.6833	33.326	8.8252	110.713	110.713	126.756	3.80532	0	3	1	1	0	1	3.80815	0.57735	1	1	1	TEST
685	4.24264	5.26807	5.99807	7.63307	0.506195	5.19462	1.40726	5.24242	16.4128	0.250902	5.93635	3.95526	7.81814	2.15046	12.265	0.948541	72.5329	33.326	18.0108	156.661	156.661	213.648	3.78174	-0.733212	5	1	1	0	1	3.68288	0.930242	1	1	0	TRAIN
686	2.73861	2.84829	3.58463	4.26312	1.41895	4.24386	2.44639	4.99567	11.3919	0.473122	4.90595	3.7388	7.8149	2.20727	6.69801	1.79957	18.0108	0	2.1057	38.8047	38.8047	126.327	3.80529	0	2	1	0	0	1	0.742646	0.333333	1	1	0	TRAIN
687	4.58258	5.50579	6.54335	7.44825	0.401973	5.32853	1.17706	5.33308	21.1186	0.200868	5.98559	3.95293	7.4341	1.73028	21.392	1.00384	75.6724	4.90088	31.7248	173.696	173.696	127.289	3.8772	-0.92183	0	1	0	0	1	1.75766	0.333333	0	1	1	TRAIN
688	1	1.31083	2.65306	0	1.94493	3.09307	2.23064	4.59615	8.41521	0.816768	4.30218	3.60814	6.34142	2.05984	3.58691	0	85.3667	0	0	37.905	37.905	85.3667	2.81505	0	0	0	0	0	0	0.893132	0	0	1	0	TRAIN
689	4.3589	6.33453	3.53401	5.37064	0.867606	4.63327	2.23127	5.42928	14.7663	0.255145	5.22499	3.66636	7.47861	1.71059	11.2283	0.430268	68.7381	0	51.7296	122.239	122.239	67.8283	3.66784	3.92291	0	0	0	0	0	4.37975	0	0	1	0	TEST
690	4.58258	7.64872	3.70946	5.31321	0.785251	4.82014	2.15988	5.42928	15.5732	0.227315	5.29194	3.66563	7.43464	1.5677	12.4128	0.42124	32.3363	0	65.1472	141.938	141.938	36.1448	3.66784	5.06401	0	0	0	0	0	4.82153	0	0	1	1	TRAIN
691	5.91608	17.5413	5.01011	5.42053	0.530789	4.65633	1.91221	5.42928	21.6897	0.115662	5.65353	3.66597	7.43098	1.47018	20.478	0.909405	32.3363	0	100.631	177.422	177.422	36.1448	3.68471	5.30218	0	0	0	0	0	8.46598	0	0	1	0	TRAIN
692	3	3.22931	5.57533	5.18178	0.84208	5.21366	1.84676	5.53112	21.7198	0.311605	5.36827	3.5978	7.43501	2.00064	13.0606	1.01624	64.6725	0	34.6476	71.2296	71.2296	157.656	4.17951	-0.0311196	0	1	0	0	1	0.937955	0	0	0	1	TRAIN
693	4.63681	9.40479	7.42563	8.08036	0.47428	6.07918	1.4792	5.51166	33.5393	0.174041	6.2601	4.09366	7.43596	1.90361	30.0101	1.1516	263.333	11.7711	119.824	199.708	199.708	349.514	4.28217	-1.84654	1	1	1	0	1	0.566902	1.12468	0	1	0	TRAIN
694	2.12132	2.25477	4.81724	6.52778	0.95738	4.49591	1.81802	5.18085	15.5303	0.429776	5.25556	3.83808	7.42708	1.76537	8.46288	1.26405	49.2693	2.75675	61.1914	88.1603	88.1603	58.5935	3.6541	0.719754	1	1	1	0	1	1.88864	1.44225	0	1	0	TRAIN
695	3.31662	2.79788	6.51707	7.24438	0.554889	5.079	1.34685	5.36251	22.6341	0.306829	5.60475	3.88233	7.42578	1.73467	12.6534	1.00308	30.2784	0	15.9521	135.483	135.483	95.9113	3.92026	0.97271	0	0	0	0	0	1.9358	0	0	1	0	TEST
696	2.12132	0.987015	4.13148	5.18284	1.63886	3.85217	2.16336	5.38892	13.6279	0.867164	5.27808	3.94506	7.7177	2.43346	7.16371	2.23497	74.1625	0	16.405	53.1534	53.1534	69.4579	4.73135	-0.55037	0	1	0	0	1	0.169956	0	1	1	0	TEST
697	1.87083	1.42639	1.72891	5.05146	1.14205	4.0958	1.83763	4.87898	12.1682	0.568191	4.6904	3.70138	4.89787	1.66694	5.32952	1.22479	0	23.5422	9.18477	76.5291	76.5291	37.7667	3.31562	0	0	0	0	0	0	2.12411	0	0	1	1	TEST
698	3.67423	4.4403	3.96894	4.44375	1.15679	4.26676	2.39257	5.10853	12.1491	0.336895	4.94424	3.70537	6.32049	1.9053	9.3816	1.44738	42.6833	0	46.5921	63.3812	63.3812	128.05	3.28921	0	0	1	0	0	1	1.13318	0	0	1	1	TRAIN
699	3.87298	4.92682	5.34101	6.71375	0.49131	5.04101	1.37664	5.39187	11.9676	0.289631	5.85422	3.86215	7.71607	2.14416	13.3424	0.763166	200.696	35.6539	9.04742	123.105	123.105	204.936	4.68562	-1.28749	1	1	1	0	1	1.96862	0	1	1	1	TRAIN
700	4.69042	5.3084	4.25947	5.73334	0.585673	5.46595	1.56321	5.59607	15.4336	0.213128	5.45557	3.66019	6.33414	1.68442	16.3668	0.695109	0	0	60.6461	104.922	104.922	143.817	3.72171	4.01981	0	0	0	0	0	4.47173	0	0	1	0	TEST
701	2.82843	4.75707	5.75864	4.95583	1.01637	5.18038	2.27772	5.48396	26.626	0.293259	5.41255	3.5869	7.43761	2.00839	13.7284	1.05774	94.9509	0	43.4728	93.5846	93.5846	140.118	4.15246	-1.16973	0	1	0	0	1	1.08439	0	0	0	1	TRAIN
702	1.22474	0.939845	2.96083	4.42709	1.51605	3.625	1.96348	4.86272	12.7302	0.768145	4.54453	3.69194	6.31291	1.86128	4.09936	1.77315	42.6833	23.5422	6.65024	45.5658	45.5658	64.6831	3.31128	0	0	0	0	0	0	0.692573	0	0	1	1	TRAIN
703	2.64575	6.35979	2.75343	0	1.81211	3.70282	2.71584	4.23321	7	0.517435	4.23882	3.33425	7.47862	2.22231	4.15714	1.37229	68.7381	0	8.8252	47.6401	47.6401	67.8283	3.47241	-0.913796	0	0	0	0	0	1.16913	0	0	0	0	TRAIN
704	2.54951	1.78021	5.99045	7.48579	0.724093	4.98229	1.48361	5.39773	23.5109	0.422387	5.46841	3.95068	7.4273	1.90067	8.47981	1.20746	83.9616	23.5422	0	105.822	105.822	111.828	3.82994	-0.337644	0	0	0	0	0	1.73633	0	0	1	1	TRAIN
705	5.47723	6.87352	7.12092	6.33683	0.345959	5.59446	1.09807	5.86708	18.3345	0.158617	6.12175	3.7552	7.43146	2.08179	31.6421	0.862454	87.3357	35.3133	40.4612	67.6837	67.6837	576.428	4.15287	0.20472	0	0	0	0	0	-2.33345	0	0	1	0	TRAIN
706	3.39116	3.28381	4.30341	3.49651	1.33717	4.77909	2.64802	5.16981	13.4915	0.346829	5.02969	3.42001	7.53243	2.34963	9.82946	0.939613	61.5183	35.208	21.0125	12.6722	12.6722	251.413	3.69265	-0.980233	2	1	1	0	1	-2.58992	1.41421	1	1	1	TEST
707	1	1.10981	1.59454	3.44601	1.39767	3.33718	1.80266	4.73205	7.74705	0.702648	4.43303	3.60747	4.64458	1.64055	3.9431	1.06035	10.9999	0	4.59238	55.1592	55.1592	10.9999	3.40256	0	0	0	0	0	0	1.53267	0	0	1	1	TEST
708	1	0.843243	3.01042	0	2.39335	2.1867	2.25715	4.41421	7.41915	0.844265	4.1938	3.36268	7.4537	2.53259	3.03994	0	64.6725	0	5.06906	19.4517	19.4517	61.2897	3.89628	-0.796296	0	0	0	0	0	0.0629326	0	0	0	0	TRAIN
709	3.60555	5.68638	1.51465	0	2.08896	3.48853	3.60653	4.75821	11	0.493135	5.10108	3.39372	4.86565	1.54596	19.0753	0.637229	3.50061	0	25.8858	158.589	119.441	100.108	4.79067	1.55214	0	1	0	0	1	2.33861	0	0	0	1	TRAIN
710	3.08221	2.67935	5.03465	5.36422	0.934886	4.26033	1.90332	5.39789	10.8488	0.51662	5.51725	3.86921	7.71603	1.98966	11.6452	1.50033	80.3145	0	25.4271	76.6326	76.6326	106.541	4.68592	0	1	1	0	0	1	0.856124	0	1	1	0	TRAIN
711	1.73205	1.03161	3.36806	0	3.05856	2.46967	2.39971	5.16425	7.34005	1.35503	4.90871	3.73006	7.71127	2.63962	7.27539	0	44.313	0	1.79938	26.7978	26.7978	44.313	5.15683	0	0	0	0	0	0	-0.0100202	0	1	0	0	TRAIN
712	4	4.33055	5.52611	6.43565	0.737074	3.65695	1.80696	5.51169	12.106	0.363597	5.6844	3.94967	7.71444	2.149	13.4217	0.552409	104.012	0	53.6719	117.531	117.531	94.6028	5.35078	-0.455246	0	1	0	0	1	2.20496	0	1	1	1	TRAIN
713	4.3589	5.08852	6.78457	6.49205	0.75249	4.64652	1.8389	5.58825	13.7618	0.257451	5.67383	3.76092	7.47727	2.05977	14.5679	1.15837	160.774	0	32.0938	143.877	143.877	154.263	4.41199	-2.83005	1	1	1	0	1	3.2019	0	0	1	0	TEST
714	5.19615	4.38805	5.41836	5.00395	0.776233	5.17221	1.96323	5.61273	14.9585	0.240864	5.42316	3.58331	7.43499	1.92037	14.8297	0.762487	64.6725	0	58.5887	95.1707	95.1707	157.656	4.22111	0.231343	0	1	0	0	1	1.3978	0	0	0	1	TRAIN
715	3.4641	4.46355	2.74936	7.12392	0.687924	3.47406	1.65501	5.18333	11.8656	0.307238	5.60954	3.85158	4.89411	1.65065	16.2311	0.563466	3.50061	0	0	217.486	178.337	72.1483	3.36459	1.59734	0	0	0	1	0	4.75682	0	0	1	0	TRAIN
716	2.82843	5.88312	2.70681	0	3.20968	3.23593	3.15449	5.09651	6	1.01139	4.89798	3.63442	7.76612	2.68438	8.10642	0	44.313	0	35.9026	4.34442	4.34442	116.306	5.02761	0	0	1	0	0	0	-1.73131	0	1	0	0	TEST
717	1.58114	1.75674	4.85359	3.85015	1.18517	4.26269	1.96496	5.06347	10.4652	0.497595	4.85742	3.55842	8.20276	2.31693	6.53214	1.30987	75.1154	42.7781	30.7965	36.8104	36.8104	76.2499	3.85374	-2.60403	0	1	0	0	1	0.809075	0.5	0	1	0	TRAIN
718	3.53553	4.64108	3.84801	4.25117	1.1968	3.83545	2.37875	5.10826	11.6551	0.356244	4.90112	3.69461	6.34303	1.91431	8.76294	1.72083	85.3667	0	46.5921	60.1956	60.1956	128.05	3.28406	0	0	1	0	0	1	1.12937	0	0	1	1	TRAIN
719	4.47214	3.5968	4.65022	5.21085	1.70755	2.24917	3.08457	5.52203	14.5515	0.389787	5.05887	3.86196	6.31157	1.40223	10.239	0.651979	42.6833	0	79.4268	107.936	107.936	42.6833	3.7555	0	0	0	0	0	0	4.90748	0	0	1	0	TRAIN
720	2.64575	2.20026	3.62523	4.34299	1.8271	3.35021	2.88353	5.30616	12.7127	0.609765	5.52087	3.90629	7.81495	2.09838	15.9611	1.14705	0	0	0	189.48	32.8857	218.341	3.92666	0	2	1	0	1	1	3.48233	0	1	1	0	TRAIN
721	2	2.76678	2.01739	6.38572	1.07833	3.54659	2.05518	5.16553	12.4942	0.464141	5.58847	3.88591	5.07012	1.76902	21.9776	1.16528	0	0	0	220.387	63.7921	222.389	3.42106	0	0	1	0	1	1	4.0911	0	0	1	0	TRAIN
722	2	2.23487	2.1379	6.79724	0.866218	2.55034	1.68839	5.13452	17.779	0.506251	5.60831	3.84677	5.11286	1.75655	17.7621	0.631146	0	0	0	229.476	72.8811	178.594	3.54438	0	0	0	0	1	0	4.0911	0	0	1	1	TRAIN
723	2.64575	6.38424	1.0054	0	5.18377	1.40564	3.16849	5.08613	5	1.0844	4.96003	3.26264	5.15198	1.68981	12.4517	0	0	117.446	2.84956	159.444	2.84956	156.595	3.7432	0	0	0	0	0	0	2.60411	0	0	0	0	TRAIN
724	2.44949	4.14286	1.00309	0	3.97067	1	2.9935	4.56155	5	0.975322	4.94208	3.16857	5.01736	1.72145	12.4517	0	0	23.5422	0	156.595	0	156.595	3.38254	0	0	0	0	0	0	2.60411	0	0	0	0	TRAIN
725	2.44949	3.88312	0.882716	0	3.97067	0.389975	2.9935	4.56155	5	1.39486	5.00316	3.44527	5.23802	1.64379	5.07884	0	0	156.595	0	164.226	7.63128	156.595	3.38254	-0.197531	0	0	0	0	0	2.45911	0	0	0	1	TRAIN
726	4.24264	6.3643	1.67445	2.19722	1.88729	2.6416	3.93447	4.8027	15	0.43997	5.3895	3.4416	4.76906	1.44174	24.4432	0.965342	0	0	49.9723	194.471	194.471	90.3841	4.67374	1.84168	0	1	0	0	1	1.7612	0	0	0	0	TEST
727	2.64575	5.10519	2.40972	0	5.18377	1.40564	3.16849	5.08613	5	0.805403	4.00795	3.10299	8.51734	3.17577	3.00186	0	0	14.9601	16.2295	16.2295	16.2295	59.8405	4.27632	0	0	0	0	0	0	1.81696	0	0	0	1	TRAIN
728	2.44949	2.48052	2.28704	0	3.97067	0.389975	2.9935	4.56155	5	0.971993	4.10822	3.32159	8.4542	3.06526	0.451632	0	0	0	0	30.1129	30.1129	59.8405	3.61615	-5.81481	0	0	0	0	0	1.67196	0	0	0	1	TEST
729	1.22474	1.52673	2.71083	0	1.78218	3.5	2.12502	4.49889	8.14633	0.690125	4.17297	3.07006	7.52937	1.85556	4.48299	4.03312	36.5922	19.1611	17.3833	11.7672	11.7672	55.7533	4.25886	0	3	1	1	0	1	0.174562	1	1	1	1	TRAIN
730	3.24037	3.24771	4.67984	6.4356	0.781899	4.95397	1.71811	5.52991	18.7562	0.329488	5.25083	3.82504	6.3121	1.57766	11.8225	1.13207	42.6833	0	50.508	93.7369	93.7369	53.6832	3.80878	1.43178	0	0	0	0	0	4.49516	0	0	1	0	TRAIN
731	0	0.618923	1.44444	0	3.125	2.16198	2.08333	3.61803	6.81818	0.918878	3.54541	2.95096	4.36195	1.41274	3.05749	0	10.9999	0	14.2538	14.2538	14.2538	10.9999	2.46482	0	0	0	0	0	0	0.407962	0	0	0	1	TRAIN
732	2.12132	2.3377	4.55851	3.80666	1.08979	4.80197	2.02539	5.10037	11.6529	0.394083	4.94457	3.45563	7.42871	2.26645	9.53396	0.988099	36.1448	27.818	25.7753	8.91606	8.91606	206.878	3.79978	-0.57075	0	1	0	0	1	-1.91342	0.5	0	1	0	TRAIN
733	3.74166	6.00671	1.40613	0	1.98372	2.12581	3.53769	4.70928	11	0.630701	5.27289	3.43446	4.78109	1.44421	20.6226	0.832163	0	0	6.24863	184.333	184.333	90.3841	4.66857	1.67444	0	1	0	0	1	0.453865	0	0	0	0	TRAIN
734	4.24264	1.42181	2.82639	0	4.0491	0.954252	5.06267	5.73205	12	0.641622	5.14144	3.74449	7.88058	2.93727	0.144027	0	0	0	0	0	0	202.988	4.62829	0	8	1	0	0	0	1.51216	0	1	0	1	TRAIN
735	3.16228	4.26976	1.44837	5.31012	0.895711	4.57405	1.83045	4.87554	10.1283	0.362749	5.21893	3.62466	4.73995	1.49488	12.5408	0.80225	28.5566	25.8701	18.4888	122.152	122.152	16.7855	3.17217	0	0	1	0	0	1	2.44831	0.632456	0	1	0	TRAIN
736	1.73205	0.970645	4.44079	4.9492	1.54291	3.65376	2.18526	5.25974	13.9168	0.622933	4.87053	3.7402	7.44428	2.06554	5.33013	0.963953	92.1697	9.36049	31.6528	39.4765	39.4765	67.0754	3.96516	-0.722037	0	1	0	0	1	0.402757	1.37318	0	1	0	TEST
737	1.41421	1.3256	1.4438	6.87353	0.935153	4.29708	1.61452	4.81011	12.291	0.612503	5.17016	3.87733	5.0043	1.7071	7.8885	0.879445	54.8903	13.9152	31.2346	93.4249	93.4249	33.5711	3.05842	0	0	1	0	0	1	1.5259	0	0	1	0	TRAIN
738	4.58258	5.21562	4.35694	5.08682	1.10559	4.64896	2.52607	5.31583	13.4532	0.317414	5.73415	3.86163	7.71727	2.28883	22.4552	0.861252	74.1625	11.7711	18.0108	138.88	60.5823	233.122	5.17975	-0.746121	0	1	0	0	1	0.796343	0	1	1	0	TEST
739	2.73861	1.27408	2.08333	0	1.48552	1.77207	1.82079	5.60168	5.78088	1.05613	5.23215	3.73952	4.70425	1.57635	13.1514	0	3.18418	0	12.6342	56.9777	53.7935	41.1593	3.83088	0	0	1	0	0	0	0.551545	0	0	0	1	TRAIN
740	1.73205	3.42995	0.842593	0	0	2.06717	2.32379	4	3	1.10258	4.04192	3.19331	5.00106	1.60329	6.17617	0	0.713349	0	41.7224	54.7306	54.7306	78.0892	3.71958	0.5	0	1	0	0	0	-0.317449	0	0	0	1	TEST
741	4.12311	4.46621	4.31696	6.35979	0.894119	3.4163	2.08283	5.39525	14.6002	0.360362	5.49155	3.85873	6.31449	1.61024	16.6834	0.466212	85.3667	0	70.6016	156.57	156.57	85.3667	4.59121	0	0	0	0	0	0	5.47353	0	0	1	0	TRAIN
742	1.73205	2.82892	1.61413	5.66837	0.832833	3.05118	1.68123	4.73205	10.2277	0.535385	5.07857	3.69759	4.81	1.70347	9.92015	0.721132	0	0	0	116.644	116.644	65.7944	4.55305	0	0	1	0	0	1	3.05019	0	0	1	1	TRAIN
743	2.23607	2.15211	3.75287	6.11354	0.848603	4.8125	1.69098	5.14026	13.4066	0.4175	5.30202	3.78921	6.2831	1.8794	11.9561	0.77321	66.8992	13.6702	67.8196	64.0423	64.0423	208.027	3.85808	0.498849	0	1	0	0	1	-0.15059	1.19055	0	1	1	TRAIN
744	2	3.97403	0.787037	0	3.91556	2.92193	2.53954	4.17009	4	0.896672	4.17208	3.17682	5.08577	1.58045	6.48677	0	0	0.284521	50.7854	45.4766	45.4766	110.864	3.71784	0.115741	0	1	1	0	0	-1.45757	0	0	0	0	TRAIN
745	1	1.46806	3.34806	0	1.94493	3.58496	2.23064	4.59615	8.41521	0.770398	4.59705	3.44076	7.42881	1.93797	6.16421	0	29.8496	12.0556	36.0215	68.7049	68.7049	70.337	3.82875	0.186343	0	1	0	0	0	-0.3098	0	0	1	1	TRAIN
746	1.73205	3.39099	0.62037	0	0	1.375	2.32379	4	3	1.17371	4.05839	3.16572	5.19566	1.50497	5.85626	0	0	0.284521	65.7944	45.4766	45.4766	110.986	3.67797	0	0	1	0	0	0	-1.43379	0	0	0	1	TRAIN
747	4.89898	7.60245	4.38956	5.71538	0.551859	4.44124	1.66217	5.4005	16.7069	0.168898	5.47	3.87847	6.31207	1.44507	17.019	0.637445	42.6833	0	98.4815	116.467	116.467	53.6832	3.69736	0	0	0	0	0	0	6.23724	0	0	1	0	TEST
748	5.2915	8.77244	4.58279	6.11741	0.557693	4.58275	1.71886	5.40647	18.0073	0.163744	5.58433	3.8802	7.43477	1.49191	18.669	0.848283	32.3363	0	107.307	137.727	137.727	47.1447	3.73909	-0.262204	0	0	0	0	0	6.50609	0	0	1	0	TRAIN
749	3.53553	4.89932	5.073	4.68733	0.758687	4.32672	1.77789	5.38975	11.9148	0.358432	5.54221	3.84965	7.71706	2.01992	14.6737	1.82087	69.4579	4.27582	60.4698	75.8993	75.8993	69.4579	4.68908	-0.710671	0	1	1	0	1	1.62234	1.1547	1	1	0	TRAIN
750	3.87298	4.90176	4.81464	4.45507	1.06472	4.46132	2.33071	5.38911	11.9323	0.396899	5.44341	3.84939	7.71706	2.10251	13.2239	1.86004	69.4579	4.27582	59.2409	77.5497	77.5497	69.4579	4.68908	-0.690718	0	1	0	0	1	1.43892	0	1	1	0	TRAIN
751	2.64575	1.79005	3.83148	3.66276	1.932	3.78418	2.54511	5.36629	9.79634	0.846615	5.18964	3.87002	7.72878	2.26127	8.93972	0.688748	44.313	0	8.8252	57.2739	57.2739	75.6044	4.68336	0	0	0	0	0	1	0.778301	0	1	1	1	TRAIN
752	2.23607	2.49496	3.36475	3.8408	1.35089	3.6897	2.1713	4.65843	9.20293	0.535152	4.60749	3.62326	7.44035	1.88543	5.11907	1.87762	25.1449	4.27582	59.7331	56.9483	56.9483	58.0421	3.48664	-0.533469	0	1	0	0	1	1.19773	0	0	1	0	TRAIN
753	2	1.76463	5.38824	5.22036	0.908669	2.88925	1.58205	5.3029	8.62427	0.482891	5.13609	3.80986	7.43637	2.03021	7.3623	1.67673	68.8271	0	22.0072	40.6477	40.6477	50.2899	3.84588	1.93509	0	1	0	0	1	0.395339	0	0	1	1	TRAIN
754	4.69042	2.31195	9.13309	6.38012	0.709428	5.35711	1.58506	6.05566	24.6497	0.290997	5.60738	3.83732	8.18745	2.04059	16.2551	0.977694	82.5566	14.9601	45.4389	87.3202	87.3202	172.616	4.47375	0.0864456	0	0	0	0	0	1.91094	0	0	1	1	TRAIN
755	1.87083	2.02337	1.90317	7.31626	0.839168	4.21506	1.67671	5.1694	14.4384	0.472887	5.2576	3.89893	5.26866	1.79401	6.77574	0.816426	67.1421	6.55493	6.79998	63.7379	63.7379	165.834	3.20006	0	0	1	0	0	1	2.70349	0	0	1	0	TRAIN
756	1.73205	4.81956	0.354167	0	0	0	2.32379	4	3	3.22201	7.98635	3.05609	4.07567	1.1931	45.229	0	11.7711	137.862	0	137.862	0	0	3.48	0	0	0	0	0	0	2.4187	0	0	0	1	TRAIN
757	5.91608	22.4658	5.21715	3.95124	1.42777	3.93942	4.32256	4.64499	32	0.149925	5.48285	3.27054	7.43502	1.73638	19.4901	1.46679	97.0088	0	81.282	102.856	102.856	108.434	3.72426	-0.924579	0	0	0	0	0	5.84428	0	0	0	1	TEST
758	3.4641	2.69206	3.54475	0	4.97561	1.75	4.02039	5.64575	7	0.836474	4.98484	3.43274	8.37254	2.49866	5.22148	0	0	117.446	2.1391	119.585	2.1391	162.326	4.7027	0	0	0	0	0	0	2.78344	0	0	0	0	TRAIN
759	3	3.10951	2.625	0	4.65633	2.03064	3.5412	5.2618	6	0.920241	4.9146	3.43263	7.47856	1.94063	8.56194	0	68.7381	117.446	0	118.356	0.909874	185.274	4.22614	-1.46065	0	0	0	0	0	0.995611	0	0	0	0	TEST
760	1.41421	1.7683	1.51423	0	1.96276	3.09307	2.48727	4.96987	9.7152	0.800421	5.10506	3.7634	5.09311	1.73633	14.4135	3.19442	0	0	0	149.657	32.2111	150.343	3.38358	0	0	1	0	1	1	3.31388	0	0	1	0	TRAIN
761	2	4.85714	0.984568	0	3.91556	1.75	2.53954	4.17009	4	1.01442	4.66467	3.00157	4.90863	1.75926	12.737	0	0	11.7711	2.84956	120.295	2.84956	117.446	3.04389	0	0	0	0	0	0	2.2264	0	0	0	0	TRAIN
762	2.44949	4.85714	0.949846	0	0	1.06128	3.02372	5	4	1.38743	4.72235	3.23623	5.14716	1.60695	12.737	0	0	117.446	8.8252	126.271	8.8252	117.446	3.65157	0	0	0	0	0	0	2.2264	0	0	0	0	TRAIN
763	2	4.5974	0.845679	0	3.91556	1.38998	2.53954	4.17009	4	1.45678	4.73122	3.27456	5.11943	1.65193	8.20032	0	0	90.0684	0	131.053	13.6069	117.446	3.04389	0.0895062	0	0	0	0	0	2.0814	0	0	0	0	TEST
764	2.44949	4.79221	2.9838	0	0	0	3.02372	5	4	1.61078	4.75789	3.199	8.19991	1.82228	3.47887	0	0	117.446	0	117.446	0	132.406	4.02354	0	0	0	0	0	0	2.02624	0	0	0	0	TRAIN
765	3.08221	2.38752	4.79319	5.52893	1.20902	3.38418	2.08722	5.18798	13.917	0.58218	5.5279	3.8186	7.44638	2.08173	16.7202	1.4192	59.6992	117.446	1.51856	203.112	85.6665	167.736	4.76019	-0.922361	0	1	0	0	1	2.57293	0	0	1	0	TEST
766	1.41421	1.7683	3.00821	0	1.96276	3.08506	2.48727	4.96987	9.7152	0.808923	5.11132	3.76235	6.31647	1.88787	13.1443	2.42315	42.6833	0	0	146.9	29.4543	160.129	3.4214	0	0	0	0	1	0	3.31388	0	0	1	1	TRAIN
767	2.64575	3.40419	3.20865	4.37536	1.31372	4.0374	2.36848	4.96561	11.1547	0.493699	5.31171	3.75946	7.47679	2.03939	15.6811	1.14316	68.7381	0	4.59238	157.646	40.2	196.274	3.63366	-1.09061	0	0	0	1	0	2.91379	0	0	1	0	TEST
768	4.12311	3.33644	4.34956	0	3.37544	3.10869	4.5274	5.58532	11	0.769185	5.40708	3.59601	7.39315	2.05925	20.9691	0.981979	34.1065	129.217	0	153.88	21.7661	194.236	3.94542	0	0	0	0	0	0	0.488936	0	1	0	0	TRAIN
769	2.23607	3.85714	1.27469	0	3.13516	2.05403	2.75418	4.30278	5	0.750638	4.71164	3.0387	4.74756	1.77032	15.4738	0	0	0	5.69913	123.145	5.69913	117.446	3.03454	0	0	0	0	1	0	2.60411	0	0	0	1	TRAIN
770	3	5.38393	2.485	0	2.17584	2.64229	3.29508	4.48119	9	0.410767	4.23247	3.01365	6.27102	2.17398	6.61626	1.21798	0	0	9.44143	6.31711	6.31711	128.05	2.83048	0	0	1	0	0	0	-0.937286	0	0	0	0	TRAIN
771	2.82843	8.99027	2.26314	1.09861	1.37171	2.75163	2.6476	3.90211	9	0.350723	4.23272	2.84989	6.26849	1.98568	6.68117	0.995257	21.9998	0	18.3695	18.3695	18.3695	107.366	2.52507	0	0	0	0	0	0	-0.937286	0	0	0	0	TRAIN
772	3.87298	3.4198	4.02807	6.29653	0.778018	4.30351	1.78451	5.29232	11.0099	0.364827	5.50708	3.79232	8.51575	2.70294	7.58201	1.23213	46.6351	17.2199	34.0478	84.0697	84.0697	147.065	4.57546	-2.14924	2	1	0	0	1	2.07495	0.338062	1	0	1	TRAIN
773	4.58258	4.55093	4.84483	5.98959	1.55806	3.79144	3.14778	5.38646	16.7599	0.359716	5.43803	3.85857	8.51312	2.70045	11.8148	0.679707	0	0	34.6904	65.0987	65.0987	146.374	4.46237	0	4	1	0	0	1	4.20695	0	1	1	0	TRAIN
774	2.12132	0.993675	4.01736	0	2.44735	3.0761	2.71303	5.35907	9.27284	0.670205	4.5265	3.57378	7.44958	2.14215	5.27042	0	54.9945	6.7625	20.7747	37.5139	37.5139	61.2897	4.26406	-0.868056	0	1	0	0	0	-0.363745	0	0	0	0	TRAIN
775	3.80789	4.66194	5.93896	5.92359	0.867735	4.50738	2.05574	5.33398	14.0138	0.255353	5.45036	3.84912	7.47676	2.01866	12.5299	0.817865	129.295	0	39.1483	113.634	113.634	118.118	3.87346	1.32158	0	0	0	0	0	3.55658	0	0	1	0	TRAIN
776	1.41421	1.38337	1.68954	0	1.90853	3.10924	2.46197	4.93543	9.61444	0.664191	4.47913	3.7534	4.80754	1.51277	4.94036	1.32747	0	0	26.4756	57.7416	57.7416	32.8972	3.10748	0	0	1	0	0	1	2.50988	0	0	1	1	TRAIN
777	1.22474	1.31782	0.203704	0	1.92125	2.8433	2.34623	4.80696	8.99801	0.704817	4.36467	3.69828	4.52947	1.4254	4.3142	0.648148	0	0	26.4756	64.4611	64.4611	0	2.99676	0	0	0	0	0	0	3.25888	0	0	1	1	TRAIN
778	2.64575	2.67821	1.12731	0	3.25311	2.77778	3.14421	4.62865	6	0.669705	4.36326	3.28374	4.78546	1.42699	8.22207	0	0	0.284521	21.1351	70.6657	70.6657	45.192	3.85846	0.763889	0	1	0	0	0	0.180172	0.5	0	0	1	TEST
779	3.24037	2.44843	3.31093	5.49717	1.53992	2.25163	2.64081	5	11.9846	0.532316	5.19981	3.80319	7.82332	2.84186	3.25831	0.949102	0	0	0	36.699	36.699	152.241	3.84634	0	6	1	0	0	1	2.00543	0	1	1	0	TEST
780	4.12311	8.91493	2.83158	2.83321	1.94781	2.84644	3.83569	4.60502	14	0.378644	5.11269	3.28224	7.82937	2.60419	5.21132	1.1281	29.1406	0	9.18477	9.18477	9.18477	181.381	4.70362	0	9	0	0	0	1	0.575037	0	1	0	1	TRAIN
781	4.89898	12.0988	5.49923	2.94444	1.99021	3.29203	4.40128	5.26973	19	0.372568	8.68504	3.44546	7.39692	1.68489	192.014	1.21746	57.5916	0	20.9893	313.277	20.9893	41.0281	3.38746	0	0	0	0	0	0	4.75527	0	1	0	1	TRAIN
782	5.74456	14.7024	6.42905	3.7612	1.85436	3.66997	4.88119	5.27106	28	0.226176	5.51748	3.44344	7.39692	1.5217	21.732	2.68908	57.5916	0	97.1428	113.706	97.1428	41.0281	3.36871	0	0	0	0	0	0	6.08287	0	1	0	0	TEST
783	3.87298	8.18188	3.14364	0	2.26392	2.9531	3.87427	4.67513	12	0.354398	4.52831	3.16587	6.27812	1.91865	8.3706	0.652452	0	0	35.917	32.7927	32.7927	128.05	2.99658	0	0	1	0	0	0	0.0666682	0	0	0	0	TRAIN
784	2.91548	1.9699	3.62639	6.24693	1.02464	4.53267	1.87466	4.97582	12.4984	0.446446	4.97953	3.88134	7.47707	2.01093	6.64382	1.0708	68.7381	13.9152	52.2172	58.2995	58.2995	100.725	3.73623	-0.971962	0	1	0	0	1	-1.26695	0	0	1	0	TRAIN
785	2.91548	1.9699	3.62639	6.24693	1.02464	4.53267	1.87466	4.97582	12.4984	0.446446	4.97953	3.88134	7.47707	2.01093	6.64382	1.0708	68.7381	13.9152	52.2172	58.2995	58.2995	100.725	3.73623	-0.971962	0	1	0	0	1	-1.26695	0	0	1	0	TRAIN
786	4	6.09745	4.9294	6.1419	0.560376	4.37353	1.60291	4.87012	13.2627	0.214795	5.52596	3.72224	7.43995	1.9971	11.7694	1.0074	145.923	0	2.53453	146.188	146.188	157.656	3.68079	-0.694484	0	0	0	0	0	1.7446	0	0	1	0	TRAIN
787	1	1.24143	3.21472	0	1.94493	3.58496	2.23064	4.59615	8.41521	0.753794	4.34063	3.40918	7.44658	2.27624	3.03926	0	54.9945	16.0469	36.0215	27.5041	27.5041	50.2899	3.65441	-0.855324	0	1	0	0	0	-0.711631	0	0	1	1	TRAIN
788	3.08221	4.93319	4.94777	5.22255	0.460266	4.98614	1.32474	5.13554	12.546	0.206831	5.48396	3.64793	7.44445	1.74212	14.0659	0.94988	54.9945	4.27582	42.5525	109.534	109.534	61.2897	3.92607	-0.0466519	0	1	0	0	1	1.55305	1.03395	0	1	0	TEST
789	1.73205	2.9754	2	0	0	1.375	2.32379	4	3	1.09013	3.56051	3.04438	7.45143	1.86828	2.39749	0	25.1449	4.27582	65.7944	4.27582	4.27582	90.9393	3.4	-0.833333	0	1	0	0	0	-1.86357	0	0	0	0	TRAIN
790	2.23607	4.9824	2.59931	0	2.636	3.02699	2.62721	4.21432	5	0.697422	3.88974	3.08194	7.44463	2.05342	3.72509	0	25.1449	6.7625	46.3148	20.1801	20.1801	69.042	3.58011	-0.710648	0	1	0	0	1	-0.702691	0	0	0	1	TEST
791	6.12372	5.43267	8.32199	8.23139	0.437782	6.19046	1.22176	6.04935	25.4791	0.210693	6.27167	4.00666	7.43811	1.79762	28.8448	1.28424	97.0088	4.90088	75.2455	215.672	215.672	204.801	4.41511	-1.91939	0	1	0	0	1	2.69476	0.458566	0	1	0	TRAIN
792	2.23607	4.79739	2.75028	0	2.636	3.02206	2.62721	4.21432	5	0.743702	3.96212	3.15862	7.4348	2.02244	3.30907	0	32.3363	11.7711	8.8252	43.3176	43.3176	51.9117	3.62569	-0.328704	0	0	0	0	0	0.478713	0	0	0	1	TRAIN
793	1	2.22078	0.277778	0	0	1.38998	1.63299	3	2	2.07153	6.88627	2.92818	4.38954	1.37001	33.0642	0	0	11.7711	0	71.0668	25.1127	15.7669	1.98403	0	0	0	0	0	0	1.45192	0	0	0	1	TRAIN
794	1	2.02597	0.651235	0	0	1.38998	1.63299	3	2	1.72634	3.84796	2.88836	4.8576	1.58033	6.22015	0	0	11.7711	0	64.7068	25.5582	54.9156	2.04823	0	0	0	0	0	0	1.21888	0	0	0	1	TRAIN
795	1	1.67532	2.05556	0	0	1.38998	1.63299	3	2	1.34611	3.23828	2.81867	8.20983	2.58433	2.07363	0	0	26.7312	0	31.1786	31.1786	30.727	2.00801	0	0	0	0	0	0	0.96968	0	0	0	1	TRAIN
796	1.73205	2.98839	2.13889	0	0	1.05664	2.32379	4	3	1.22831	3.64442	3.0896	8.38573	3.02569	2.28087	0	0	0	0	30.8234	30.8234	45.6871	3.14577	-1.83333	0	0	0	0	0	1.21888	0	0	0	0	TRAIN
797	1.41421	0.977533	3.66	0	2.2161	3.61687	2.30303	4.71102	7.85818	0.701091	4.21972	3.35964	7.42607	1.91812	4.15995	0	29.8496	11.7711	10.2991	36.6938	36.6938	40.9118	3.72838	0.208333	0	1	0	0	0	0.467865	0	0	0	1	TEST
798	3.4641	3.18541	3.92932	3.17805	1.47216	4.63131	2.7895	5.51318	13.7227	0.334856	4.92824	3.49244	6.38165	2.40804	11.2295	1.02821	0	0	20.5453	2.53453	2.53453	298.783	3.74701	0	0	1	0	0	1	-3.08903	0	0	1	0	TRAIN
799	2.91548	4.08113	3.89733	6.23564	0.683422	4.629	1.65194	4.8647	11.622	0.336097	5.24059	3.71788	7.43049	1.85562	8.36924	1.33926	72.5329	33.326	35.6612	100.145	100.145	101.154	3.53265	-0.121241	1	1	1	0	1	2.4711	0	0	1	1	TRAIN
800	5.2915	8.90643	5.60143	7.21137	0.352749	4.68615	1.17713	5.02009	13.1733	0.169069	6.14945	3.82853	7.44562	1.91393	25.6205	1.19767	120.256	66.652	53.6719	291.643	213.346	245.529	3.96224	-2.1819	2	1	1	1	1	3.2452	0	0	1	0	TRAIN
801	5.47723	9.71696	6.00344	7.23178	0.351066	4.99767	1.20064	5.04365	14.1921	0.154668	6.31701	3.82587	7.44563	1.89354	36.1672	0.971243	120.256	66.652	71.3223	363.058	206.464	323.826	3.96319	-2.29686	2	1	1	1	1	3.95745	0	0	1	0	TRAIN
802	5.91608	10.6963	6.06747	7.32667	0.342123	4.90848	1.2171	5.05057	15.7385	0.143726	6.40601	3.83438	7.44566	1.86075	39.4266	0.994753	120.256	66.652	53.6719	384.59	227.996	367.826	3.96359	-2.69495	2	1	1	1	1	1.44516	0	0	1	0	TRAIN
803	2.44949	1.55785	6.06557	8.49717	0.651712	3.61635	1.37985	5.49933	27.6227	0.421784	5.61342	4.11833	7.42938	1.96767	7.48102	1.11811	60.5568	0	0	154.612	154.612	50.2899	3.73893	0.0613104	0	0	0	0	0	4.84293	0	0	1	0	TRAIN
804	3.24037	4.18327	3.5925	4.92635	1.23855	4.50258	2.4578	4.95397	12.7767	0.388461	5.05528	3.72684	7.81492	2.21326	8.56891	0.69251	18.0108	0	6.69809	45.8838	45.8838	147.113	3.78237	0	2	1	0	0	1	0.604104	0.2	1	1	0	TRAIN
805	1.87083	5.10319	5.31753	5.66751	0.888379	4.98619	2.01635	5.14034	24.7868	0.304966	5.30618	3.80323	7.43305	2.03742	11.4106	0.724992	147.981	0	24.0324	80.6333	80.6333	146.656	3.72946	-0.400268	0	0	0	0	0	2.80363	0	0	1	0	TEST

## Sheet: Leverage_Outliers
ID	Hi	AD status	Set	h*
2	0.0615307	In	TRAIN	0.168317
3	0.0542293	In	TRAIN
4	0.0380819	In	TRAIN
5	0.0390356	In	TRAIN
6	0.11793	In	TRAIN
7	0.0450805	In	TRAIN
8	0.0249751	In	TRAIN
10	0.0189722	In	TRAIN
11	0.0186766	In	TRAIN
12	0.0185395	In	TRAIN
13	0.0196205	In	TRAIN
16	0.0295626	In	TRAIN
17	0.0500582	In	TRAIN
18	0.0420048	In	TRAIN
19	0.0369678	In	TRAIN
20	0.0371279	In	TRAIN
22	0.462619	Outlier	TRAIN
23	0.0395473	In	TRAIN
25	0.0345506	In	TRAIN
26	0.0318475	In	TRAIN
27	0.0344883	In	TRAIN
29	0.0483334	In	TRAIN
30	0.0437671	In	TRAIN
31	0.0421456	In	TRAIN
32	0.0627763	In	TRAIN
33	0.0247865	In	TRAIN
35	0.0845158	In	TRAIN
36	0.018937	In	TRAIN
37	0.0274756	In	TRAIN
39	0.0393134	In	TRAIN
40	0.0374295	In	TRAIN
41	0.0392066	In	TRAIN
42	0.0393961	In	TRAIN
43	0.0308904	In	TRAIN
44	0.0778403	In	TRAIN
46	0.036985	In	TRAIN
47	0.0340003	In	TRAIN
49	0.062398	In	TRAIN
50	0.0636405	In	TRAIN
52	0.0200993	In	TRAIN
53	0.023949	In	TRAIN
55	0.0393193	In	TRAIN
56	0.0226578	In	TRAIN
57	0.0428083	In	TRAIN
58	0.0416648	In	TRAIN
59	0.0433123	In	TRAIN
60	0.0234104	In	TRAIN
62	0.0629715	In	TRAIN
64	0.0540278	In	TRAIN
66	0.0829805	In	TRAIN
67	0.0630132	In	TRAIN
69	0.0424448	In	TRAIN
71	0.0250838	In	TRAIN
72	0.0372057	In	TRAIN
73	0.0378665	In	TRAIN
74	0.0582009	In	TRAIN
75	0.0510933	In	TRAIN
76	0.0509954	In	TRAIN
77	0.0483238	In	TRAIN
79	0.0284801	In	TRAIN
80	0.0933052	In	TRAIN
81	0.0396506	In	TRAIN
82	0.0306429	In	TRAIN
83	0.0280368	In	TRAIN
84	0.0269042	In	TRAIN
85	0.0597107	In	TRAIN
86	0.0220846	In	TRAIN
89	0.0332157	In	TRAIN
91	0.0471832	In	TRAIN
92	0.0231322	In	TRAIN
93	0.117034	In	TRAIN
94	0.0371612	In	TRAIN
95	0.0524792	In	TRAIN
96	0.0409338	In	TRAIN
98	0.026557	In	TRAIN
99	0.0410851	In	TRAIN
100	0.0289399	In	TRAIN
102	0.0236236	In	TRAIN
103	0.0299471	In	TRAIN
104	0.101358	In	TRAIN
106	0.0452296	In	TRAIN
107	0.0525305	In	TRAIN
108	0.0885084	In	TRAIN
109	0.0248622	In	TRAIN
110	0.0491165	In	TRAIN
112	0.0440146	In	TRAIN
113	0.0234204	In	TRAIN
115	0.019239	In	TRAIN
117	0.0326145	In	TRAIN
118	0.0280235	In	TRAIN
119	0.0292497	In	TRAIN
121	0.0417946	In	TRAIN
122	0.0376217	In	TRAIN
123	0.0662324	In	TRAIN
124	0.0488913	In	TRAIN
126	0.0167422	In	TRAIN
127	0.12374	In	TRAIN
129	0.0877945	In	TRAIN
130	0.34985	Outlier	TRAIN
131	0.0329925	In	TRAIN
133	0.0330137	In	TRAIN
134	0.0356467	In	TRAIN
135	0.0341063	In	TRAIN
136	0.0776065	In	TRAIN
138	0.0283853	In	TRAIN
139	0.045866	In	TRAIN
140	0.0501994	In	TRAIN
143	0.0664191	In	TRAIN
145	0.0435359	In	TRAIN
146	0.0409661	In	TRAIN
147	0.0601112	In	TRAIN
148	0.104707	In	TRAIN
149	0.050086	In	TRAIN
151	0.0293605	In	TRAIN
152	0.0307572	In	TRAIN
154	0.0408054	In	TRAIN
155	0.0397755	In	TRAIN
156	0.0378542	In	TRAIN
157	0.129949	In	TRAIN
158	0.0868348	In	TRAIN
161	0.0626492	In	TRAIN
162	0.0406895	In	TRAIN
163	0.0629189	In	TRAIN
164	0.0516203	In	TRAIN
165	0.0629745	In	TRAIN
166	0.0479648	In	TRAIN
167	0.0601767	In	TRAIN
168	0.0710355	In	TRAIN
170	0.0376836	In	TRAIN
171	0.061103	In	TRAIN
172	0.0395477	In	TRAIN
173	0.0984223	In	TRAIN
175	0.0396389	In	TRAIN
176	0.039607	In	TRAIN
177	0.0486708	In	TRAIN
179	0.022842	In	TRAIN
180	0.053655	In	TRAIN
181	0.0353227	In	TRAIN
183	0.0311437	In	TRAIN
184	0.0660111	In	TRAIN
185	0.0361498	In	TRAIN
186	0.542012	Outlier	TRAIN
187	0.0365377	In	TRAIN
188	0.0424967	In	TRAIN
189	0.0518495	In	TRAIN
191	0.0523564	In	TRAIN
192	0.0606973	In	TRAIN
194	0.0469353	In	TRAIN
195	0.0726727	In	TRAIN
197	0.0524205	In	TRAIN
198	0.040758	In	TRAIN
199	0.0415744	In	TRAIN
200	0.0930136	In	TRAIN
201	0.0430482	In	TRAIN
204	0.0246208	In	TRAIN
205	0.0296607	In	TRAIN
207	0.0323152	In	TRAIN
208	0.0389311	In	TRAIN
209	0.048127	In	TRAIN
210	0.0468367	In	TRAIN
211	0.0300574	In	TRAIN
213	0.123217	In	TRAIN
214	0.162071	In	TRAIN
215	0.081422	In	TRAIN
216	0.0272025	In	TRAIN
217	0.0694305	In	TRAIN
218	0.0392082	In	TRAIN
219	0.0372459	In	TRAIN
222	0.0426109	In	TRAIN
223	0.0282136	In	TRAIN
225	0.0839289	In	TRAIN
226	0.0433716	In	TRAIN
227	0.0551556	In	TRAIN
228	0.0417897	In	TRAIN
230	0.0445383	In	TRAIN
232	0.0765671	In	TRAIN
234	0.0505686	In	TRAIN
236	0.0365319	In	TRAIN
237	0.0697077	In	TRAIN
238	0.0359685	In	TRAIN
239	0.0327841	In	TRAIN
240	0.0345495	In	TRAIN
241	0.0395611	In	TRAIN
242	0.0258029	In	TRAIN
244	0.0429758	In	TRAIN
246	0.0433294	In	TRAIN
247	0.0603964	In	TRAIN
248	0.0238007	In	TRAIN
249	0.0570714	In	TRAIN
251	0.0261144	In	TRAIN
252	0.0367211	In	TRAIN
253	0.0667364	In	TRAIN
254	0.0339642	In	TRAIN
255	0.0275506	In	TRAIN
256	0.0389582	In	TRAIN
257	0.02831	In	TRAIN
259	0.0210255	In	TRAIN
261	0.0680012	In	TRAIN
262	0.0382723	In	TRAIN
263	0.0574433	In	TRAIN
265	0.0558147	In	TRAIN
266	0.021878	In	TRAIN
269	0.0396309	In	TRAIN
273	0.138886	In	TRAIN
274	0.049723	In	TRAIN
276	0.039388	In	TRAIN
277	0.0549645	In	TRAIN
278	0.0582969	In	TRAIN
279	0.0634269	In	TRAIN
280	0.0627135	In	TRAIN
281	0.046255	In	TRAIN
282	0.0577266	In	TRAIN
283	0.119316	In	TRAIN
284	0.0317205	In	TRAIN
285	0.0374391	In	TRAIN
287	0.0827999	In	TRAIN
288	0.0638734	In	TRAIN
289	0.0485749	In	TRAIN
290	0.037799	In	TRAIN
291	0.0483715	In	TRAIN
293	0.0678832	In	TRAIN
294	0.0435476	In	TRAIN
295	0.0363085	In	TRAIN
296	0.0532021	In	TRAIN
297	0.100966	In	TRAIN
298	0.0487898	In	TRAIN
299	0.0394843	In	TRAIN
301	0.0233416	In	TRAIN
302	0.0205175	In	TRAIN
304	0.0329273	In	TRAIN
305	0.0348343	In	TRAIN
306	0.0308116	In	TRAIN
309	0.0297376	In	TRAIN
310	0.0370205	In	TRAIN
311	0.104102	In	TRAIN
312	0.03759	In	TRAIN
313	0.0370115	In	TRAIN
314	0.0324905	In	TRAIN
315	0.0858083	In	TRAIN
316	0.0420695	In	TRAIN
317	0.0236813	In	TRAIN
320	0.0212855	In	TRAIN
322	0.023744	In	TRAIN
323	0.0211312	In	TRAIN
325	0.04272	In	TRAIN
328	0.0562251	In	TRAIN
330	0.0292665	In	TRAIN
332	0.0364285	In	TRAIN
333	0.177999	Outlier	TRAIN
334	0.0580649	In	TRAIN
335	0.0503283	In	TRAIN
336	0.0339652	In	TRAIN
337	0.0518564	In	TRAIN
338	0.370139	Outlier	TRAIN
339	0.0465872	In	TRAIN
340	0.0609793	In	TRAIN
341	0.0427726	In	TRAIN
342	0.0529508	In	TRAIN
344	0.0674496	In	TRAIN
345	0.0391975	In	TRAIN
346	0.0253733	In	TRAIN
347	0.037058	In	TRAIN
348	0.0392353	In	TRAIN
349	0.0492268	In	TRAIN
350	0.0316056	In	TRAIN
353	0.0818937	In	TRAIN
354	0.0483913	In	TRAIN
355	0.0720621	In	TRAIN
357	0.0503147	In	TRAIN
358	0.0911884	In	TRAIN
359	0.124982	In	TRAIN
360	0.0671125	In	TRAIN
361	0.0707769	In	TRAIN
363	0.0657418	In	TRAIN
364	0.161372	In	TRAIN
365	0.285908	Outlier	TRAIN
366	0.106447	In	TRAIN
368	0.0252374	In	TRAIN
370	0.0257888	In	TRAIN
372	0.0352792	In	TRAIN
373	0.0267159	In	TRAIN
374	0.0351159	In	TRAIN
375	0.0511824	In	TRAIN
376	0.0700006	In	TRAIN
377	0.0729547	In	TRAIN
378	0.0413471	In	TRAIN
381	0.0288972	In	TRAIN
382	0.030259	In	TRAIN
383	0.0350421	In	TRAIN
384	0.0233196	In	TRAIN
385	0.0209393	In	TRAIN
386	0.0280735	In	TRAIN
388	0.0292945	In	TRAIN
391	0.0543646	In	TRAIN
392	0.0645445	In	TRAIN
393	0.0484329	In	TRAIN
394	0.036138	In	TRAIN
396	0.569892	Outlier	TRAIN
397	0.0291081	In	TRAIN
400	0.0954739	In	TRAIN
401	0.0593216	In	TRAIN
402	0.0340611	In	TRAIN
403	0.0398236	In	TRAIN
404	0.0372172	In	TRAIN
405	0.0543525	In	TRAIN
406	0.0564205	In	TRAIN
407	0.033527	In	TRAIN
408	0.0584429	In	TRAIN
409	0.141924	In	TRAIN
410	0.0268232	In	TRAIN
411	0.0589367	In	TRAIN
414	0.0404929	In	TRAIN
415	0.0532832	In	TRAIN
416	0.0260163	In	TRAIN
419	0.0873173	In	TRAIN
422	0.0536106	In	TRAIN
424	0.0521955	In	TRAIN
425	0.0332394	In	TRAIN
426	0.033654	In	TRAIN
427	0.0333497	In	TRAIN
428	0.0610144	In	TRAIN
429	0.0589038	In	TRAIN
430	0.0376111	In	TRAIN
431	0.097619	In	TRAIN
434	0.050819	In	TRAIN
435	0.0374994	In	TRAIN
436	0.0905741	In	TRAIN
437	0.028009	In	TRAIN
439	0.0763275	In	TRAIN
440	0.0257457	In	TRAIN
441	0.031515	In	TRAIN
442	0.205141	Outlier	TRAIN
443	0.0994527	In	TRAIN
446	0.0377079	In	TRAIN
447	0.0353787	In	TRAIN
448	0.0245318	In	TRAIN
449	0.0963412	In	TRAIN
451	0.0253443	In	TRAIN
452	0.0555886	In	TRAIN
454	0.0355346	In	TRAIN
456	0.0400617	In	TRAIN
457	0.0352613	In	TRAIN
458	0.0408672	In	TRAIN
459	0.0350375	In	TRAIN
460	0.0277039	In	TRAIN
461	0.0322185	In	TRAIN
462	0.0823049	In	TRAIN
463	0.0444082	In	TRAIN
464	0.0214536	In	TRAIN
465	0.0719878	In	TRAIN
466	0.0534218	In	TRAIN
467	0.298578	Outlier	TRAIN
468	0.0539705	In	TRAIN
469	0.0471403	In	TRAIN
470	0.0320107	In	TRAIN
471	0.0579634	In	TRAIN
472	0.0246121	In	TRAIN
476	0.0279176	In	TRAIN
477	0.0283499	In	TRAIN
478	0.0496726	In	TRAIN
479	0.0300195	In	TRAIN
482	0.190937	Outlier	TRAIN
483	0.158956	In	TRAIN
484	0.0318859	In	TRAIN
485	0.0414535	In	TRAIN
486	0.0361814	In	TRAIN
487	0.0551328	In	TRAIN
489	0.134552	In	TRAIN
490	0.0312031	In	TRAIN
491	0.0185528	In	TRAIN
492	0.0263199	In	TRAIN
493	0.026145	In	TRAIN
494	0.0186752	In	TRAIN
495	0.0312828	In	TRAIN
496	0.0319058	In	TRAIN
500	0.0441582	In	TRAIN
501	0.042328	In	TRAIN
502	0.0291067	In	TRAIN
503	0.0236014	In	TRAIN
504	0.0407699	In	TRAIN
505	0.0450298	In	TRAIN
508	0.0333861	In	TRAIN
509	0.0378295	In	TRAIN
510	0.0370949	In	TRAIN
511	0.0258379	In	TRAIN
512	0.0316054	In	TRAIN
515	0.0283846	In	TRAIN
516	0.0418805	In	TRAIN
517	0.0191604	In	TRAIN
518	0.0271889	In	TRAIN
519	0.052323	In	TRAIN
520	0.0247571	In	TRAIN
523	0.0308709	In	TRAIN
524	0.0513787	In	TRAIN
525	0.0403408	In	TRAIN
527	0.0352819	In	TRAIN
528	0.0347823	In	TRAIN
530	0.0881694	In	TRAIN
531	0.0274054	In	TRAIN
532	0.0303106	In	TRAIN
533	0.0397083	In	TRAIN
534	0.0353379	In	TRAIN
536	0.0435251	In	TRAIN
537	0.0193309	In	TRAIN
538	0.0236997	In	TRAIN
540	0.106279	In	TRAIN
541	0.0326952	In	TRAIN
542	0.0452068	In	TRAIN
543	0.0284163	In	TRAIN
544	0.0263686	In	TRAIN
546	0.0268547	In	TRAIN
547	0.0238482	In	TRAIN
548	0.0475516	In	TRAIN
549	0.0255723	In	TRAIN
550	0.0227343	In	TRAIN
551	0.0627244	In	TRAIN
554	0.0258441	In	TRAIN
556	0.0269248	In	TRAIN
557	0.0928194	In	TRAIN
558	0.0528316	In	TRAIN
559	0.0276833	In	TRAIN
561	0.0203577	In	TRAIN
562	0.0679462	In	TRAIN
563	0.0801206	In	TRAIN
564	0.0852245	In	TRAIN
566	0.029374	In	TRAIN
567	0.0234095	In	TRAIN
568	0.0199852	In	TRAIN
570	0.0231262	In	TRAIN
571	0.0282617	In	TRAIN
573	0.0207909	In	TRAIN
574	0.0310931	In	TRAIN
575	0.0992037	In	TRAIN
576	0.050948	In	TRAIN
577	0.0295439	In	TRAIN
578	0.0314395	In	TRAIN
580	0.0518397	In	TRAIN
581	0.0305033	In	TRAIN
582	0.0400643	In	TRAIN
584	0.117112	In	TRAIN
585	0.0944526	In	TRAIN
586	0.0223829	In	TRAIN
587	0.0374418	In	TRAIN
588	0.0224758	In	TRAIN
589	0.0199814	In	TRAIN
590	0.046291	In	TRAIN
592	0.0446925	In	TRAIN
593	0.059999	In	TRAIN
594	0.0258885	In	TRAIN
596	0.0216208	In	TRAIN
597	0.019479	In	TRAIN
599	0.0285254	In	TRAIN
601	0.0229106	In	TRAIN
603	0.0540352	In	TRAIN
606	0.105184	In	TRAIN
607	0.102715	In	TRAIN
608	0.0388868	In	TRAIN
609	0.0376138	In	TRAIN
610	0.0774366	In	TRAIN
611	0.0694511	In	TRAIN
613	0.0416423	In	TRAIN
614	0.0480785	In	TRAIN
615	0.0828931	In	TRAIN
616	0.0888348	In	TRAIN
617	0.041259	In	TRAIN
618	0.0419949	In	TRAIN
619	0.0346036	In	TRAIN
620	0.0213198	In	TRAIN
621	0.0221911	In	TRAIN
622	0.0262975	In	TRAIN
625	0.0272176	In	TRAIN
627	0.0366671	In	TRAIN
628	0.0205034	In	TRAIN
629	0.0373631	In	TRAIN
631	0.0586518	In	TRAIN
633	0.0172082	In	TRAIN
635	0.0800798	In	TRAIN
639	0.0467268	In	TRAIN
640	0.0497181	In	TRAIN
641	0.0416731	In	TRAIN
643	0.0325554	In	TRAIN
644	0.0244508	In	TRAIN
645	0.0382076	In	TRAIN
647	0.072249	In	TRAIN
648	0.0296358	In	TRAIN
649	0.0289935	In	TRAIN
650	0.034143	In	TRAIN
651	0.0306873	In	TRAIN
652	0.047918	In	TRAIN
653	0.0354805	In	TRAIN
655	0.106187	In	TRAIN
656	0.0627558	In	TRAIN
657	0.0596169	In	TRAIN
658	0.0513903	In	TRAIN
659	0.07903	In	TRAIN
660	0.033746	In	TRAIN
661	0.044566	In	TRAIN
663	0.0389577	In	TRAIN
664	0.0241399	In	TRAIN
666	0.0383967	In	TRAIN
667	0.0396197	In	TRAIN
668	0.0501727	In	TRAIN
669	0.0730978	In	TRAIN
670	0.0346269	In	TRAIN
673	0.0219245	In	TRAIN
675	0.0500846	In	TRAIN
677	0.0265787	In	TRAIN
678	0.0541334	In	TRAIN
679	0.0476709	In	TRAIN
681	0.0407535	In	TRAIN
682	0.0320894	In	TRAIN
683	0.0466903	In	TRAIN
685	0.0739142	In	TRAIN
686	0.0185951	In	TRAIN
687	0.050392	In	TRAIN
688	0.0348016	In	TRAIN
690	0.0877787	In	TRAIN
691	0.167451	In	TRAIN
692	0.0480673	In	TRAIN
693	0.112025	In	TRAIN
694	0.0410609	In	TRAIN
698	0.0223462	In	TRAIN
699	0.0825916	In	TRAIN
701	0.0673948	In	TRAIN
702	0.0213545	In	TRAIN
703	0.0311514	In	TRAIN
704	0.0373605	In	TRAIN
705	0.151829	In	TRAIN
708	0.033508	In	TRAIN
709	0.0828353	In	TRAIN
710	0.0237672	In	TRAIN
711	0.0713292	In	TRAIN
712	0.0497865	In	TRAIN
714	0.0470945	In	TRAIN
715	0.053513	In	TRAIN
717	0.0413457	In	TRAIN
718	0.0273702	In	TRAIN
719	0.0823872	In	TRAIN
720	0.0428287	In	TRAIN
721	0.0342138	In	TRAIN
722	0.0481007	In	TRAIN
723	0.104752	In	TRAIN
724	0.047817	In	TRAIN
725	0.118313	In	TRAIN
727	0.116955	In	TRAIN
729	0.0694634	In	TRAIN
730	0.0254949	In	TRAIN
731	0.048355	In	TRAIN
732	0.0392432	In	TRAIN
733	0.132986	In	TRAIN
734	0.253838	Outlier	TRAIN
735	0.0421905	In	TRAIN
737	0.0268566	In	TRAIN
739	0.101702	In	TRAIN
741	0.0461266	In	TRAIN
742	0.0571555	In	TRAIN
743	0.0466871	In	TRAIN
744	0.0696955	In	TRAIN
745	0.0516369	In	TRAIN
746	0.0688359	In	TRAIN
748	0.0665349	In	TRAIN
749	0.0600958	In	TRAIN
750	0.0332198	In	TRAIN
751	0.0608704	In	TRAIN
752	0.0226273	In	TRAIN
753	0.078676	In	TRAIN
754	0.0715741	In	TRAIN
755	0.0356913	In	TRAIN
756	0.200679	Outlier	TRAIN
758	0.100877	In	TRAIN
760	0.0469656	In	TRAIN
761	0.044331	In	TRAIN
762	0.0843915	In	TRAIN
764	0.101291	In	TRAIN
766	0.0405751	In	TRAIN
768	0.109458	In	TRAIN
769	0.0322493	In	TRAIN
770	0.0435218	In	TRAIN
771	0.0438371	In	TRAIN
772	0.0552146	In	TRAIN
773	0.0686835	In	TRAIN
774	0.0367801	In	TRAIN
775	0.0443701	In	TRAIN
776	0.0366609	In	TRAIN
777	0.0432638	In	TRAIN
780	0.314291	Outlier	TRAIN
781	0.691164	Outlier	TRAIN
783	0.0456042	In	TRAIN
784	0.0344049	In	TRAIN
785	0.0344049	In	TRAIN
786	0.0421262	In	TRAIN
787	0.0469826	In	TRAIN
789	0.0694141	In	TRAIN
791	0.0795545	In	TRAIN
792	0.0223349	In	TRAIN
793	0.104271	In	TRAIN
794	0.0666794	In	TRAIN
795	0.0980945	In	TRAIN
796	0.0992806	In	TRAIN
798	0.0705501	In	TRAIN
799	0.0304109	In	TRAIN
800	0.0917785	In	TRAIN
801	0.100761	In	TRAIN
802	0.140383	In	TRAIN
803	0.0776223	In	TRAIN
804	0.0247169	In	TRAIN
1	0.0817008	In	TEST
9	0.0164367	In	TEST
14	0.0483719	In	TEST
15	0.0449279	In	TEST
21	0.0804784	In	TEST
24	0.0403756	In	TEST
28	0.0436672	In	TEST
34	0.0217658	In	TEST
38	0.0430055	In	TEST
45	0.0272526	In	TEST
48	0.0446374	In	TEST
51	0.0339377	In	TEST
54	0.0584567	In	TEST
61	0.0824269	In	TEST
63	0.0515427	In	TEST
65	0.0629244	In	TEST
68	0.0490014	In	TEST
70	0.0562533	In	TEST
78	0.0525558	In	TEST
87	0.0273395	In	TEST
88	0.0429561	In	TEST
90	0.0293043	In	TEST
97	0.0411837	In	TEST
101	0.060653	In	TEST
105	0.153233	In	TEST
111	0.0226763	In	TEST
114	0.0567577	In	TEST
116	0.0515224	In	TEST
120	0.0277791	In	TEST
125	0.0705899	In	TEST
128	0.0364917	In	TEST
132	0.0418361	In	TEST
137	0.0797157	In	TEST
141	0.0609676	In	TEST
142	0.0483174	In	TEST
144	0.0396106	In	TEST
150	0.0400843	In	TEST
153	0.10007	In	TEST
159	0.067434	In	TEST
160	0.102459	In	TEST
169	0.0466645	In	TEST
174	0.0322939	In	TEST
178	0.0608586	In	TEST
182	0.021421	In	TEST
190	1.60024	Outside AD	TEST
193	0.0306638	In	TEST
196	0.671748	Outside AD	TEST
202	0.0672969	In	TEST
203	0.0219011	In	TEST
206	0.0354325	In	TEST
212	0.114808	In	TEST
220	0.0902953	In	TEST
221	0.0360993	In	TEST
224	0.0417208	In	TEST
229	0.0321599	In	TEST
231	0.0662817	In	TEST
233	0.0386744	In	TEST
235	0.0871062	In	TEST
243	0.0472206	In	TEST
245	0.0661327	In	TEST
250	0.0231544	In	TEST
258	0.0210255	In	TEST
260	0.0498311	In	TEST
264	0.0750159	In	TEST
267	0.0660619	In	TEST
268	0.0281796	In	TEST
270	0.0392377	In	TEST
271	0.0563406	In	TEST
272	0.0804234	In	TEST
275	0.094693	In	TEST
286	0.0441859	In	TEST
292	0.0776812	In	TEST
300	0.0230471	In	TEST
303	0.0859026	In	TEST
307	0.034688	In	TEST
308	0.0271741	In	TEST
318	0.0272079	In	TEST
319	0.0330691	In	TEST
321	0.0617173	In	TEST
324	0.062907	In	TEST
326	0.12624	In	TEST
327	0.0396122	In	TEST
329	0.0241401	In	TEST
331	0.073785	In	TEST
343	0.0473193	In	TEST
351	0.0252697	In	TEST
352	0.048375	In	TEST
356	0.075093	In	TEST
362	0.237696	Outside AD	TEST
367	0.0288279	In	TEST
369	0.0195123	In	TEST
371	0.0358635	In	TEST
379	0.0160999	In	TEST
380	0.0290925	In	TEST
387	0.0191914	In	TEST
389	0.0237499	In	TEST
390	0.0247202	In	TEST
395	0.512592	Outside AD	TEST
398	0.0807986	In	TEST
399	0.0678686	In	TEST
412	0.0474885	In	TEST
413	0.0870829	In	TEST
417	0.0537596	In	TEST
418	0.0730424	In	TEST
420	0.0653374	In	TEST
421	0.0691113	In	TEST
423	0.0355749	In	TEST
432	0.0384029	In	TEST
433	0.0512263	In	TEST
438	0.0219594	In	TEST
444	0.0398724	In	TEST
445	0.0490165	In	TEST
450	0.119986	In	TEST
453	0.0320598	In	TEST
455	0.0216304	In	TEST
473	0.0292218	In	TEST
474	0.0321222	In	TEST
475	0.0317907	In	TEST
480	0.0244768	In	TEST
481	0.0487921	In	TEST
488	0.0401916	In	TEST
497	0.0917487	In	TEST
498	0.018978	In	TEST
499	0.0273256	In	TEST
506	0.0331564	In	TEST
507	0.0354022	In	TEST
513	0.0394695	In	TEST
514	0.0401293	In	TEST
521	0.0579598	In	TEST
522	0.0589676	In	TEST
526	0.0276722	In	TEST
529	0.0596205	In	TEST
535	0.0713049	In	TEST
539	0.0237399	In	TEST
545	0.0306906	In	TEST
552	0.0281188	In	TEST
553	0.0699434	In	TEST
555	0.033213	In	TEST
560	0.0343732	In	TEST
565	0.0399228	In	TEST
569	0.0234867	In	TEST
572	0.0347905	In	TEST
579	0.0402077	In	TEST
583	0.0295606	In	TEST
591	0.0493311	In	TEST
595	0.0301735	In	TEST
598	0.0270708	In	TEST
600	0.0285407	In	TEST
602	0.0605336	In	TEST
604	0.0306885	In	TEST
605	0.0302082	In	TEST
612	0.0299975	In	TEST
623	0.0275738	In	TEST
624	0.0198739	In	TEST
626	0.059669	In	TEST
630	0.0942664	In	TEST
632	0.0495585	In	TEST
634	0.0467801	In	TEST
636	0.0311446	In	TEST
637	0.0373001	In	TEST
638	0.0310653	In	TEST
642	0.0294251	In	TEST
646	0.0594201	In	TEST
654	0.0382453	In	TEST
662	0.0317542	In	TEST
665	0.0624657	In	TEST
671	0.0359083	In	TEST
672	0.0721303	In	TEST
674	0.0780831	In	TEST
676	0.0660893	In	TEST
680	0.0501103	In	TEST
684	0.0271529	In	TEST
689	0.0707219	In	TEST
695	0.049764	In	TEST
696	0.0428826	In	TEST
697	0.0251119	In	TEST
700	0.0670812	In	TEST
706	0.042	In	TEST
707	0.0262867	In	TEST
713	0.0850447	In	TEST
716	0.0847945	In	TEST
726	0.122079	In	TEST
728	0.178647	Outside AD	TEST
736	0.0410202	In	TEST
738	0.052378	In	TEST
740	0.0613913	In	TEST
747	0.0563996	In	TEST
757	0.201046	Outside AD	TEST
759	0.0897292	In	TEST
763	0.0666385	In	TEST
765	0.0843226	In	TEST
767	0.0332793	In	TEST
778	0.0481942	In	TEST
779	0.115911	In	TEST
782	0.166785	In	TEST
788	0.0436689	In	TEST
790	0.0263911	In	TEST
797	0.0357818	In	TEST
805	0.0570882	In	TEST

## Sheet: True_External_Set
No.	SMILES	Yobs	Ypred_(LR-ARKA-RASAR)	Ypred_(ANN-RASAR)	Status
E001	O=C(NP(=O)(OC)SC)C	1	0	0	-
E002	O=C(N(c1c(cccc1CC)CC)COC)CCl	1	0	0	-
E003	C1=CC2CC1C3C2C4(C(=C(C3(C4(Cl)Cl)Cl)Cl)Cl)Cl	1	0	0	Prediction Cliff
E004	C=CCCl	1	1	1	-
E005	Nc1ccc3c(c1)c2ccccc2n3CC	1	1	1	-
E006	Nc1ccc(cc1)c2ccccc2	1	1	1	-
E007	O(c1ccccc1(N))C	1	1	1	-
E008	O=C1c3ccccc3(C(=O)c2ccccc12)	1	0	1	-
E009	c1cc(cc(c1)Cl)c2cc(cc(c2)Cl)Cl	1	0	0	-
E010	c1cc(cc(c1c2ccc(cc2Cl)Cl)Cl)Cl	1	0	0	-
E011	c1c(cc(cc1Cl)Cl)c2cc(cc(c2)Cl)Cl	1	0	0	-
E012	c2cc(c1ccc(c(c1Cl)Cl)Cl)c(c(c2)Cl)Cl	1	0	0	Prediction Cliff
E013	c1cc(c(c(c1c2ccc(c(c2Cl)Cl)Cl)Cl)Cl)Cl	1	0	0	Prediction Cliff
E014	N=C(c1ccc(cc1)N(C)C)c2ccc(cc2)N(C)C	1	0	1	-
E015	N#[N+]C=C([O-])OCC(N)C(=O)O	1	0	0	-
E016	c3ccc4cc2c(ccc1ccccc12)cc4(c3)	1	1	1	-
E017	c1ccc4c(c1)ccc5c3cccc2cccc(c23)c45	1	1	1	-
E018	c1ccc3c(c1)cc5c2ccccc2c4cccc3c45	1	1	1	-
E019	c1ccc2cc3c5cccc4cccc(c3(cc2(c1)))c45	1	1	1	-
E020	c1ccc(cc1)C(Cl)(Cl)Cl	1	0	0	-
E021	O=S(=O)(O)c1cccc(c1)CN(c2ccc(cc2)C(c3ccc(cc3)N(Cc4cccc(c4)S(=O)(=O)O)CC)=C5C=CC(C=C5)=[N+](C)C)CC	1	0	0	-
E022	c1ccc(cc1)c2ccccc2	1	0	0	-
E023	O(CCCl)CCCl	1	0	0	-
E024	C(CBr)Cl	1	1	1	-
E025	Oc1ccc(OC)cc1C(C)(C)C	1	0	0	-
E026	N=C1C=CC(C=C1)=C(c2ccc(N)cc2)c3ccc(N)cc3	1	0	0	-
E027	O=[As](O)(C)C	1	1	0	-
E028	O=C1N(C(=O)C2CC=CCC12)SC(Cl)(Cl)Cl	1	1	1	-
E029	c1ccc3c(c1)[nH]c2ccccc23	1	1	1	-
E030	O=C1C(=C(C(=O)C(=C1Cl)Cl)Cl)Cl	1	0	0	-
E031	CCC(C(C(CC(C(C(C)Cl)Cl)Cl)Cl)Cl)Cl	1	0	0	-
E032	Nc1ccc(cc1C)Cl	1	1	0	-
E033	C=C(C)CCl	1	1	1	-
E034	O=CCCl	1	1	1	-
E035	C(Cl)(Cl)Cl	1	0	1	-
E036	CCl	1	1	1	-
E037	O=NN(C(=O)NC1C(O)OC(CO)C(O)C1(O))CCCl	1	1	1	-
E038	c1ccc2c(c1)ccc3c4ccccc4(ccc23)	1	1	1	-
E039	O=C(OCC=Cc1ccccc1)c2ccccc2(N)	1	0	1	-
E040	O=NN(O)c1ccccc1	1	1	1	-
E041	N#CC(Nc1nc(nc(n1)Cl)NCC)(C)C	1	0	0	-
E042	C1(C(C(C(C(C1Br)Br)Br)Br)Br)Cl	1	0	0	-
E043	O=C(N)C1=NC=NC1(=NNN(C)C)	1	1	1	-
E044	O=C(O)CCC(=O)NN(C)C	1	1	1	-
E045	O=C(N(C(C)C)C(C)C)SCC(=CCl)Cl	1	0	0	-
E046	O(c1ccc(N)cc1(N))C	1	1	1	-
E047	n3c5ccc1ccccc1c5(cc4ccc2ccccc2c34)	1	0	1	-
E048	n2c5ccc1ccccc1c5(cc4c2ccc3ccccc34)	1	0	1	-
E049	c1ccc5c(c1)ccc4cc3c(ccc2ccccc23)cc45	1	1	1	-
E050	c1ccc3c(c1)cc4c2ccccc2c6cccc5ccc3c4c56	1	1	1	-
E051	c1ccc2c(c1)cc3ccc5c6ccccc6(cc4ccc2c3c45)	1	1	1	-
E052	c1ccc3c(c1)cc4ccc5cc2ccccc2c6ccc3c4c56	1	1	1	-
E053	c1ccc3c(c1)cc4ccc5cccc6c2ccccc2c3c4c56	1	1	1	-
E054	c1ccc5c(c1)ccc4[nH]c3ccc2ccccc2c3c45	1	0	1	-
E055	C(=CCl)CCl	1	0	0	-
E056	O(c1cc(ccc1(N))c2ccc(N)c(OC)c2)C	1	1	1	-
E057	O=P(OC)(OC)C	1	0	1	-
E058	Nc1ccc(cc1C)C	1	1	1	-
E059	c1ccc2c(c1)ccc4c2c(c3ccccc3c4C)C	1	1	1	-
E060	Nc1ccc(cc1C)c2ccc(N)c(c2)C	1	1	1	-
E061	O=C(N(C)C)Cl	1	0	0	-
E062	N(NC)C	1	1	1	-
E063	O=[N+]([O-])c3ccc1ccc4c2c(ccc3(c12))ccc4[N+](=O)[O-]	1	1	1	-
E064	O=[N+]([O-])c4ccc1ccc2ccc(c3ccc4(c1c23))[N+](=O)[O-]	1	1	1	-
E065	O=[N+]([O-])c1ccc(c(c1)[N+](=O)[O-])C	1	1	1	-
E066	O=C5C(=NNc1ccccc1)C(=Cc6cc(c(N=Nc2ccc(cc2)c4ccc(N=Nc3ccc(N)cc3(N))cc4)c(N)c56)S(=O)(=O)O)S(=O)(=O)O	1	1	1	-
E067	O=C5C(=NNc1ccc(cc1)c2ccc(cc2)NN=C3C(=O)c4c(N)cc(cc4(C=C3S(=O)(=O)O))S(=O)(=O)O)C(=Cc6cc(cc(N)c56)S(=O)(=O)O)S(=O)(=O)O	1	0	0	-
E068	O=C(O)c5cc(N=Nc1ccc(cc1)c2ccc(cc2)NN=C4C(=O)C=CC(=NNc3cc(ccc3(O))S(=O)(=O)O)C4(=O))ccc5(O)	1	1	0	-
E069	Oc1ccc2c(c1)CCC3C2CCC4(C)(C(O)CCC34)	1	0	0	-
E070	N1CC1	1	1	1	-
E071	O=C(NS(=O)(=O)C)c2cc(Oc1ccc(cc1Cl)C(F)(F)F)ccc2[N+](=O)[O-]	1	0	0	-
E072	O=C2OCCN2(N=Cc1oc(cc1)[N+](=O)[O-])	1	1	1	-
E073	O=C(c1cc(oc1C)C)N(OC)C2CCCCC2	1	0	0	-
E074	O=CN(N=CC)C	1	1	1	-
E075	O1c3cc(c(c(c3(Oc2c1c(c(c(c2Cl)Cl)Cl)Cl))Cl)Cl)Cl	1	0	0	-
E076	O1C2C1C(C3C2C4(C(=C(C3(C4(Cl)Cl)Cl)Cl)Cl)Cl)Cl	1	0	0	Prediction Cliff
E077	c1cc(c(c(c1c2cc(c(c(c2Cl)Cl)Cl)Cl)Cl)Cl)Cl	1	0	0	Prediction Cliff
E078	c2c(c1cc(c(c(c1Cl)Cl)Cl)Cl)c(cc(c2Cl)Cl)Cl	1	0	0	Prediction Cliff
E079	c1c(cc(c(c1Cl)Cl)Cl)c2cc(c(c(c2Cl)Cl)Cl)Cl	1	0	0	Prediction Cliff
E080	o2c1c(cc(c(c1Cl)Cl)Cl)c3c2c(c(c(c3Cl)Cl)Cl)Cl	1	0	0	-
E081	c1cc(c(cc1c2cc(c(c(c2Cl)Cl)Cl)Cl)Cl)Cl	1	0	0	Prediction Cliff
E082	c1cc(c(c(c1c2cc(c(c(c2)Cl)Cl)Cl)Cl)Cl)Cl	1	0	0	Prediction Cliff
E083	c1c(cc(c(c1Cl)Cl)Cl)c2cc(c(cc2Cl)Cl)Cl	1	0	0	Prediction Cliff
E084	c1c(cc(c(c1Cl)Cl)Cl)c2cc(c(c(c2)Cl)Cl)Cl	1	0	0	-
E085	o2c1cc(c(cc1c3c2c(c(c(c3Cl)Cl)Cl)Cl)Cl)Cl	1	0	0	-
E086	O1c3cc(c(cc3(Oc2c1c(c(c(c2Cl)Cl)Cl)Cl))Cl)Cl	1	0	1	-
E087	O=[N+]([O-])N1CN([N+](=O)[O-])CN([N+](=O)[O-])C1	1	1	1	-
E088	o2c1cc(c(c(c1c3c2c(c(c(c3Cl)Cl)Cl)Cl)Cl)Cl)Cl	1	0	0	-
E089	O1c3cc(c(c(c3(Oc2cc(c(c(c12)Cl)Cl)Cl))Cl)Cl)Cl	1	0	1	-
E090	O1c3cc(c(c(c3(Oc2c1cc(c(c2Cl)Cl)Cl))Cl)Cl)Cl	1	0	1	-
E091	o2c1cc(c(c(c1c3cc(c(c(c23)Cl)Cl)Cl)Cl)Cl)Cl	1	0	0	-
E092	o2c1cc(c(c(c1c3c2cc(c(c3Cl)Cl)Cl)Cl)Cl)Cl	1	0	1	-
E093	o2c1c(cc(c(c1Cl)Cl)Cl)c3cc(c(c(c23)Cl)Cl)Cl	1	0	1	-
E094	o2c1ccc(c(c1c3c2c(c(c(c3Cl)Cl)Cl)Cl)Cl)Cl	1	0	0	-
E095	Oc1ccc(O)cc1	1	0	0	-
E096	c1ccc2c(c1)c3ccc4ccc5cccc6cc2c3c4c56	1	1	1	-
E097	n1c(N)c(cc3c1[nH]c2ccccc23)C	1	0	0	-
E098	NNC	1	1	1	-
E099	O=S(=O)(OC)C	1	1	0	-
E100	c1ccc2c(c1)ccc3c4ccccc4(cc(c23)C)	1	1	1	-
E101	Nc1ccc(cc1Cl)Cc2ccc(N)c(c2)Cl	1	1	1	-
E102	Nc1ccc(cc1)Cc2ccc(N)cc2	1	1	1	-
E103	c1ccc2c(c1)cccc2C	1	0	1	-
E104	O=NN(C(=N[N+](=O)[O-])N)C	1	1	1	-
E105	O=C1C=C(NC(N1)=S)C	1	1	0	-
E106	O=[N+]([O-])c1cccc(N)c1	1	1	1	-
E107	O=[N+]([O-])c2cc3c4ccccc4(ccc3(c1ccccc12))	1	1	1	-
E108	O=[N+]([O-])c4cc3cccc2ccc1cccc4(c1c23)	1	1	1	-
E109	O=NN(C(=O)N)CC	1	1	1	-
E110	O=NN(C(=O)OCC)C	1	1	1	-
E111	O=NN2CCCC2(c1cnccc1)	1	1	1	-
E112	O=[N+]([O-])c1ccccc1C	1	1	1	-
E113	O=[N+]([O-])c1ccc(cc1)C	1	1	1	-
E114	O1c3c(Oc2c1c(c(c(c2Cl)Cl)Cl)Cl)c(c(c(c3Cl)Cl)Cl)Cl	1	0	0	-
E115	o1c3c(c2c1c(c(c(c2Cl)Cl)Cl)Cl)c(c(c(c3Cl)Cl)Cl)Cl	1	0	0	Prediction Cliff
E116	O1c3cccc(c3(Oc2c1c(c(c(c2Cl)Cl)Cl)Cl))Cl	1	0	1	-
E117	o2c1cc(c(cc1c3c2cc(c(c3Cl)Cl)Cl)Cl)Cl	1	0	1	-
E118	o2c1cc(c(cc1c3cc(c(c(c23)Cl)Cl)Cl)Cl)Cl	1	0	1	-
E119	c1cc(c(cc1c2ccc(c(c2Cl)Cl)Cl)Cl)Cl	1	0	0	Prediction Cliff
E120	c1cc(ccc1c2cc(c(c(c2Cl)Cl)Cl)Cl)Cl	1	0	0	Prediction Cliff
E121	c1cc(c(cc1c2cc(c(cc2Cl)Cl)Cl)Cl)Cl	1	0	0	Prediction Cliff
E122	c1cc(cc(c1c2cc(c(c(c2)Cl)Cl)Cl)Cl)Cl	1	0	0	Prediction Cliff
E123	c1cc(c(cc1c2cc(c(c(c2)Cl)Cl)Cl)Cl)Cl	1	0	0	Prediction Cliff
E124	O1c3cc(c(cc3(Oc2c1cc(c(c2Cl)Cl)Cl))Cl)Cl	1	1	1	-
E125	O=[N+]([O-])c1c(c(c(c(c1Cl)Cl)Cl)Cl)Cl	1	0	1	-
E126	Oc1c(c(c(c(c1Cl)Cl)Cl)Cl)Cl	1	1	0	-
E127	O=[N+]([O-])OCC(CO[N+](=O)[O-])(CO[N+](=O)[O-])CO[N+](=O)[O-]	1	1	1	-
E128	N(=Nc1ccc(nc1(N))N)c2ccccc2	1	1	1	-
E129	O(c1ccccc1)CC(N(Cc2ccccc2)CCCl)C	1	0	0	-
E130	Nc1ccccc1(N)	1	0	1	-
E131	c1cc(c(c(c1c2cc(c(c(c2)Br)Br)Br)Br)Br)Br	1	0	0	Prediction Cliff
E132	O=C2C(=NNc1cc(c(cc1C)C)C)c3ccc(cc3(C=C2S(=O)(=O)O))S(=O)(=O)O	1	1	0	-
E133	O=C2C(=NNc1ccc(cc1C)C)c3cc(ccc3(C=C2S(=O)(=O)O))S(=O)(=O)O	1	1	0	-
E134	O=C(n1cncc1)N(CCOc2c(cc(cc2Cl)Cl)Cl)CCC	1	0	0	-
E135	n1c(N)ccc3c1[nH]c2ccccc23	1	1	1	-
E136	n1cccc2ccccc12	1	0	1	-
E137	n1c(nc(nc1NCC)Cl)NCC	1	1	1	-
E138	C(N(CC)CC)(=S)S	1	1	0	-
E139	O=P(OC(=CCl)c1cc(c(cc1Cl)Cl)Cl)(OC)OC	1	0	0	Prediction Cliff
E140	o2c1cc(c(cc1c3cc(c(cc23)Cl)Cl)Cl)Cl	1	1	1	-
E141	c1cc(c(cc1c2ccc(c(c2)Cl)Cl)Cl)Cl	1	0	0	-
E142	c1cc(ccc1c2cc(c(c(c2)Cl)Cl)Cl)Cl	1	0	0	Prediction Cliff
E143	c1cc(ccc1C(Cl)(Cl)Cl)Cl	1	0	1	-
E144	Nc1ccc(N)c(c1)C	1	1	1	-
E145	Nc1ccccc1C	1	0	0	-
E146	Nc1ccc(cc1)C	1	0	0	-
E147	C=C1C(CCl)(CCl)C2(C(C(C1(C2(Cl)Cl)Cl)Cl)Cl)Cl	1	0	0	Prediction Cliff
E148	O=P(OCCCC)(OCCCC)OCCCC	1	0	0	-
E149	c1cc(c(cc1Cl)Cl)Cl	1	1	1	-
E150	O=P(OC)(OC)OC	1	0	1	-
E151	O=[N+]([O-])c1cc(c(c(c1)[N+](=O)[O-])C)[N+](=O)[O-]	1	1	1	-
E152	O=P(OCCCl)(OCCCl)OCCCl	1	0	0	-
E153	n2c(N)c(c3[nH]c1ccccc1c3(c2C))C	1	0	0	-
E154	n2c(N)cc3[nH]c1ccccc1c3(c2C)	1	0	0	-
E155	c2cc1cccc3c1c(c2)CC3	0	0	1	-
E156	O=C(N(c1c(cccc1CC)C)COCC)CCl	0	0	0	-
E157	O=C(C)C	0	1	0	-
E158	N#CC(O)(C)C	0	0	0	-
E159	O=C(c1ccccc1)C	0	1	1	-
E160	N#CCCCCC#N	0	0	0	-
E161	O=C(ON=CC(C)(C)S(=O)(=O)C)NC	0	0	0	-
E162	n1c(nc(nc1NC(C)C)SC)NCC	0	0	0	-
E163	Oc1cccc(N)c1	0	0	0	-
E164	Oc1ccc(N)cc1	0	0	0	-
E165	n1ccc(N)cc1	0	1	0	-
E166	N(=CN(C=Nc1ccc(cc1C)C)C)c2ccc(cc2C)C	0	0	0	-
E167	OC(C)(C)CC	0	1	1	-
E168	c1ccc2cc3ccccc3(cc2(c1))	0	0	1	-
E169	c3c(c2cc(c(c1cc(c(c(c1)Cl)Cl)Cl)c(c2Cl)Cl)Cl)c(c(cc3Cl)Cl)Cl	0	0	0	-
E170	O=C(OC)NS(=O)(=O)c1ccc(N)cc1	0	0	0	-
E171	C1=2[C@@]3([C@H](OC1)[C@@H](C(C)=C[C@H]3C(O[C@@H]1C[C@]3(O[C@@H](C1)CC=C([C@H]([C@H](C=CC2)C)O[C@H]1C[C@@H]([C@@H](O[C@H]2C[C@@H]([C@@H](O)[C@@H](O2)C)OC)[C@@H](O1)C)OC)C)O[C@@H]([C@@H](C)C=C3)[C@H](CC)C)=O)O)O	0	0	0	-
E172	O=C(N=NC(=O)N)N	0	0	0	-
E173	O=[N+]([O-])c1cc(cc(c1N(CC)CCCC)[N+](=O)[O-])C(F)(F)F	0	0	1	-
E174	O=C(OC)Nc2nc1ccccc1n2(C(=O)NCCCC)	0	0	0	-
E175	O=C(OC)c1ccccc1CS(=O)(=O)NC(=O)Nc2nc(OC)cc(n2)OC	0	0	0	-
E176	O=C1c2ccccc2(NS(=O)(=O)N1C(C)C)	0	0	0	-
E177	O=C(c1cccc(c1)C)N(CC)CC	0	1	1	-
E178	c1ccc(cc1)S	0	1	0	-
E179	O=C(OC)c2cc(Oc1ccc(cc1Cl)Cl)ccc2[N+](=O)[O-]	0	1	1	-
E180	O=C(OCc2cccc(c1ccccc1)c2C)C3C(C=C(C(F)(F)F)Cl)C3(C)(C)	0	0	0	-
E181	O(COCCCl)CCCl	0	0	0	-
E182	c1ccc(cc1)Br	0	1	0	-
E183	C(Cl)Br	0	1	1	-
E184	O(c1cc(c(cc1Cl)Br)Cl)P(OC)(OC)=S	0	0	0	-
E185	CCCBr	0	1	1	-
E186	N#Cc1cc(c(O)c(c1)Br)Br	0	0	0	-
E187	N#Cc1cc(c(OC(=O)CCCCCCC)c(c1)Br)Br	0	0	0	-
E188	OCCCC	0	0	1	-
E189	OC(C)CC	0	0	0	-
E190	O=C(N(CC(C)C)CC(C)C)SCC	0	0	0	-
E191	c1ccc(cc1)CCCC	0	0	0	-
E192	c1ccc(cc1)C(C)CC	0	0	0	-
E193	c1ccc(cc1)C(C)(C)C	0	1	1	-
E194	O=C(OCC(=O)OCCCC)c1ccccc1(C(=O)OCCCC)	0	0	0	-
E195	O=C(Oc2cccc1c2(OC(C)(C)C1))NC	0	1	1	-
E196	C(=S)=S	0	1	1	-
E197	[C-]#[O+]	0	1	1	-
E198	O=C=S	0	0	0	-
E199	O=C(Oc2cccc1c2(OC(C)(C)C1))N(C)SN(CCCC)CCCC	0	0	0	-
E200	O=C(Nc1ccccc1)C2=C(OCCS2)C	0	0	0	-
E201	O=CC(Cl)(Cl)Cl	0	0	1	-
E202	OC(O)C(Cl)(Cl)Cl	0	0	1	-
E203	O=P(OC(=CCl)c1ccc(cc1Cl)Cl)(OCC)OCC	0	0	0	-
E204	O=C(OCC)c1ccccc1S(=O)(=O)NC(=O)Nc2nc(OC)cc(n2)Cl	0	0	0	-
E205	FC(F)(C)Cl	0	0	1	-
E206	O=C(O)c1ccc(cc1)Cl	0	0	0	-
E207	O=[N+]([O-])c1cc(ccc1Cl)C(F)(F)F	0	0	0	-
E208	FC(F)(F)c1ccc(cc1)Cl	0	0	0	-
E209	OCCCl	0	0	1	-
E210	c1ccc2cc(ccc2(c1))Cl	0	0	0	-
E211	Oc1ccccc1Cl	0	1	0	-
E212	Oc1ccc(cc1)Cl	0	0	0	-
E213	O=[N+]([O-])C(Cl)(Cl)Cl	0	0	1	-
E214	CC(C)Cl	0	0	0	-
E215	c1ccc(c(c1)C)Cl	0	1	1	-
E216	c1cc(ccc1C)Cl	0	0	0	-
E217	n1c(OP(OC)(OC)=S)c(cc(c1Cl)Cl)Cl	0	0	0	-
E218	O=C(Nc1nc(nc(n1)C)OC)NS(=O)(=O)c2ccccc2Cl	0	1	0	-
E219	O=C(OC)c1c(c(c(C(=O)OC)c(c1Cl)Cl)Cl)Cl	0	0	0	-
E220	n1nc(nnc1c2ccccc2Cl)c3ccccc3Cl	0	0	1	-
E221	Oc1cccc(c1)C	0	1	1	-
E222	Oc1ccccc1C	0	1	1	-
E223	Oc1ccc(cc1)C	0	0	0	-
E224	Oc1ccc(c(c1)C)Cl	0	0	0	-
E225	c1ccc(cc1)C(C)C	0	1	1	-
E226	[C-]#N	0	1	1	-
E227	N#CC#N	0	1	1	-
E228	N#CBr	0	1	0	-
E229	N#CCl	0	0	0	-
E230	C1CCCCC1	0	1	1	-
E231	C1=CCCCC1	0	1	1	-
E232	NC1CCCCC1	0	0	0	-
E233	C=1C=CCC=1	0	1	1	-
E234	N#CC(OC(=O)C1C(C=C(Cl)Cl)C1(C)(C))c3ccc(F)c(Oc2ccccc2)c3	0	0	0	-
E235	N#CC(OC(=O)C1C(C=C(C(F)(F)F)Cl)C1(C)(C))c3cccc(Oc2ccccc2)c3	0	0	0	-
E236	N#CC(OC(=O)C1C(C=C(Cl)Cl)C1(C)(C))c3cccc(Oc2ccccc2)c3	0	0	0	-
E237	n1c(nc(nc1N)NC2CC2)N	0	0	0	-
E238	O=C(O)C(C)(Cl)Cl	0	1	0	-
E239	CCCCCCCCCC	0	0	0	-
E240	O=P(OCC)(OCC)SCCSCC	0	0	0	-
E241	o2c1ccccc1c3ccccc23	0	0	1	-
E242	c1ccc3c(c1)c2ccccc2s3	0	0	1	-
E243	c1cc(cc(c1)Br)Br	0	0	0	-
E244	c1cc(ccc1Br)Br	0	1	0	-
E245	C(Br)Br	0	1	1	-
E246	O=C(OCCCC)c1ccccc1(C(=O)OCCCC)	0	0	0	-
E247	O=C(O)c1c(OC)c(ccc1Cl)Cl	0	0	0	-
E248	C(=CCCl)CCl	0	0	0	-
E249	c1cc(cc(c1)Cl)Cl	0	1	1	-
E250	O=C(c1ccc(cc1)Cl)c2ccc(cc2)Cl	0	0	0	-
E251	FC(F)(F)c1ccc(c(c1)Cl)Cl	0	0	0	-
E252	O(C(C)(C)Cl)C(C)(C)Cl	0	0	0	-
E253	C=C(Cl)Cl	0	0	1	-
E254	O=C(O)CCCOc1ccc(cc1Cl)Cl	0	0	0	-
E255	C(CCl)CCl	0	0	0	-
E256	OCC(CCl)Cl	0	0	0	-
E257	C=C(CCl)Cl	0	1	1	-
E258	O=C(C=C(OP(=O)(OC)OC)C)N(C)C	0	0	0	-
E259	C2=CC3C1C=CC(C1)C3(C2)	0	0	1	-
E260	OCCNCCO	0	1	0	-
E261	O=C(OCC)c1ccccc1(C(=O)OCC)	0	0	0	-
E262	OCCOCCOCCCC	0	0	0	-
E263	OCCOCCOCC	0	0	0	-
E264	c1ccc(cc1)c3cc(c2ccccc2)[n+](n3C)C	0	1	1	-
E265	O=C(NC(=O)c1c(F)cccc1(F))Nc2ccc(cc2)Cl	0	0	0	-
E266	FC(F)C	0	0	0	-
E267	O(C(C)C)C(C)C	0	0	0	-
E268	O=P(OC(C)C)(OC(C)C)C	0	1	0	-
E269	O=S1(=O)(C(=C(C)S(=O)(=O)CC1)C)	0	0	0	-
E270	Oc1ccc(cc1C)C	0	1	0	-
E271	Oc1c(cccc1C)C	0	1	1	-
E272	Oc1ccc(c(c1)C)C	0	0	0	-
E273	O=[N+]([O-])c1cc(c(O)c(c1)C)[N+](=O)[O-]	0	1	1	-
E274	O=[N+]([O-])c1cc(c(O)c(c1)C2CCCCC2)[N+](=O)[O-]	0	1	1	-
E275	O=[N+]([O-])c1ccccc1[N+](=O)[O-]	0	1	1	-
E276	O=[N+]([O-])c1cccc(c1)[N+](=O)[O-]	0	1	1	-
E277	O=[N+]([O-])c1ccc(cc1)[N+](=O)[O-]	0	1	1	-
E278	O=[N+]([O-])c1ccc(O)c(c1)[N+](=O)[O-]	0	1	1	-
E279	O=[N+]([O-])c1cccc(c1[N+](=O)[O-])C	0	1	1	-
E280	O=[N+]([O-])c1ccc(c(c1)C)[N+](=O)[O-]	0	1	1	-
E281	O=[N+]([O-])c1cc(N)c(c(c1)[N+](=O)[O-])C	0	1	1	-
E282	O=[N+]([O-])c1ccc(cc1[N+](=O)[O-])C	0	1	1	-
E283	O=[N+]([O-])c1cc(cc(c1)C)[N+](=O)[O-]	0	1	1	-
E284	O=[N+]([O-])c1cc(N)cc(c1C)[N+](=O)[O-]	0	1	1	-
E285	O=[N+]([O-])c1cc(c(O)c(c1)C(C)CC)[N+](=O)[O-]	0	1	1	-
E286	O=C(N(C)C)C(c1ccccc1)c2ccccc2	0	0	1	-
E287	O=S(=O)(c1ccccc1)c2ccccc2	0	1	1	-
E288	c1ccc(cc1)Nc2ccccc2	0	1	1	-
E289	c1cc[n+]3c(c1)c2cccc[n+]2CC3	0	0	0	-
E290	O(CC)P(OCC)(=S)SCCSCC	0	0	0	-
E291	C1CSCCS1	0	1	0	-
E292	O=C(OCCCCCCCCCCC)c1ccccc1(C(=O)OCCCCCCCCCCC)	0	0	0	-
E293	O=C(Nc1ccc(c(c1)Cl)Cl)N(C)C	0	1	1	-
E294	N(=C(N)N)CCCCCCCCCCCC	0	1	0	-
E295	O=C(N(CCC)CCC)SCC	0	0	0	-
E296	O=S1OCC2C(CO1)C3(C(=C(C2(C3(Cl)Cl)Cl)Cl)Cl)Cl	0	0	0	-
E297	O=S1(=O)(OCC2C(CO1)C3(C(=C(C2(C3(Cl)Cl)Cl)Cl)Cl)Cl)	0	0	0	-
E298	O=C(O)C2C1OC(CC1)C2(C(=O)O)	0	0	0	-
E299	OCCOCCOC	0	0	0	-
E300	O=P(O)(O)CCCl	0	1	0	-
E301	O(CC)P(OCC)(=S)SCSP(OCC)(OCC)=S	0	0	0	-
E302	O=C(OCCOCC)C	0	1	0	-
E303	OCCOCC	0	1	1	-
E304	O=C(OCC)C	0	1	1	-
E305	O(CC)CC	0	1	1	-
E306	O=C(OCC)C(=C)C	0	1	0	-
E307	O=[N+]([O-])c2ccc(OP(OCC)(c1ccccc1)=S)cc2	0	0	0	-
E308	N#CCCO	0	1	0	-
E309	NCCN	0	0	0	-
E310	OCCO	0	0	0	-
E311	OCCOCCCC	0	0	0	-
E312	O=C(OCC(=O)OCC)c1ccccc1(C(=O)OCC)	0	0	0	-
E313	O=P(Oc1ccc(c(c1)C)SC)(OCC)NC(C)C	0	0	0	-
E314	N#CC(OC(=O)C1C(C)(C)C1(C)(C))c3cccc(Oc2ccccc2)c3	0	0	0	-
E315	c1ccc2c(c1)c4cccc3cccc2c34	0	1	1	-
E316	c1ccc3c(c1)c2ccccc2C3	0	0	1	-
E317	Fc1ccccc1	0	0	1	-
E318	O=C1C(=CN(C=C1c2cccc(c2)C(F)(F)F)C)c3ccccc3	0	0	1	-
E319	FC(F)(F)Oc1ccc(cc1)C(O)(c2cncnc2)C(C)C	0	0	0	-
E320	Fc1ccc(cc1)[Si](c2ccc(F)cc2)(C)Cn3ncnc3	0	0	1	-
E321	O=C(Nc1cccc(OC(C)C)c1)c2ccccc2C(F)(F)F	0	0	0	-
E322	N#CC(OC(=O)C(Nc1ccc(cc1Cl)C(F)(F)F)C(C)C)c3cccc(Oc2ccccc2)c3	0	0	0	-
E323	O(CC)P(CC)(=S)Sc1ccccc1	0	0	0	-
E324	O=CO	0	1	0	-
E325	O=C(O)C(N)CCP(=O)(O)C	0	0	0	-
E326	O=CCCCC=O	0	0	0	-
E327	O=C(O)CNCP(=O)(O)O	0	0	0	-
E328	N=C(N)N	0	0	0	-
E329	O=C(OC)C(Oc2ccc(Oc1ncc(cc1Cl)C(F)(F)F)cc2)C	0	0	0	-
E330	c1(c(c(c(c(c1Br)Br)Br)Br)Br)Br	0	0	0	-
E331	O(c1cc(c(cc1Br)Br)Br)c2cc(c(cc2Br)Br)Br	0	0	0	-
E332	O=C=NCCCCCCN=C=O	0	1	0	-
E333	CCCCCC	0	1	1	-
E334	O=C(O)CCCCC(=O)O	0	0	0	-
E335	O=C(C)CCCC	0	1	0	-
E336	O=C1N=C(N(C(=O)N1C2CCCCC2)C)N(C)C	0	0	0	-
E337	O=C(NC1CCCCC1)N3C(=O)SC(c2ccc(cc2)Cl)C3C	0	0	0	-
E338	FC(F)(F)c3ccc(C=CC(=NNC1=NCC(C)(C)CN1)C=Cc2ccc(cc2)C(F)(F)F)cc3	0	0	0	-
E339	n1ccn(c1)CC(OCC=C)c2ccc(cc2Cl)Cl	0	0	0	-
E340	O=C(O)c2cc3ccccc3(nc2(C1=NC(C(=O)N1)(C)C(C)C))	0	0	0	-
E341	O=C(O)c2cc(cnc2(C1=NC(C(=O)N1)(C)C(C)C))CC	0	0	0	-
E342	O=C(NC(C)C)N2C(=O)N(c1cc(cc(c1)Cl)Cl)C(=O)C2	0	0	0	-
E343	OCC(C)C	0	0	1	-
E344	O=[N+]([O-])c1cc(cc(c1N(CCC)CCC)[N+](=O)[O-])C(C)C	0	0	0	-
E345	O=P(O)(OC(C)C)C	0	0	0	-
E346	O=C(Nc1onc(c1)C(C)(CC)CC)c2c(OC)cccc2(OC)	0	0	0	-
E347	O=C(OC(C(=O)OCC)C)c2cc(Oc1ccc(cc1Cl)C(F)(F)F)ccc2[N+](=O)[O-]	0	0	0	-
E348	O=C(Nc1ccc(c(c1)Cl)Cl)N(OC)C	0	1	0	-
E349	O=C(O)COc1ccc(cc1C)Cl	0	0	0	-
E350	O=C(O)CCCOc1ccc(cc1C)Cl	0	0	0	-
E351	O=C(O)C(Oc1ccc(cc1C)Cl)C	0	0	0	-
E352	O=C1OC(=O)C=C1	0	0	1	-
E353	N#CCC#N	0	1	0	-
E354	O=P(N=C1SCC(C)S1)(OCC)OCC	0	0	0	-
E355	C[N+]1(C)(CCCCC1)	0	1	0	-
E356	CCCCSP(SCCCC)SCCCC	0	0	0	-
E357	O=P(SCCCC)(SCCCC)SCCCC	0	0	0	-
E358	O=C(OC)C(N(C(=O)COC)c1c(cccc1C)C)C	0	0	0	-
E359	N#CC(=C)C	0	1	0	-
E360	O=P(OC)(N)SC	0	0	0	-
E361	OC	0	1	1	-
E362	O=C1N(N=C(OC)S1)CSP(OC)(OC)=S	0	1	1	-
E363	O=C(ON=C(C)SC)NC	0	0	0	-
E364	O=C(OCCOC)C	0	1	0	-
E365	OCCOC	0	0	0	-
E366	O=C(OC)C	0	1	0	-
E367	O=C(OC)C=C	0	1	1	-
E368	O=C(C)CC	0	1	0	-
E369	O=C(C)CC(C)C	0	1	1	-
E370	O=C=NC	0	0	0	-
E371	O=P(O)(O)C	0	1	0	-
E372	O=[As](O)(O)C	0	1	0	-
E373	CC1CCCCC1	0	1	1	-
E374	CC1CCCC1	0	1	1	-
E375	O=C=Nc1ccc(cc1)Cc2ccc(N=C=O)cc2	0	1	1	-
E376	c1ccc2cc(ccc2(c1))C	0	0	0	-
E377	C=C(c1ccccc1)C	0	1	1	-
E378	O=C(N(c1c(cccc1CC)C)C(C)COC)CCl	0	0	0	-
E379	O=C1C(=NN=C(N1(N))SC)C(C)(C)C	0	0	0	-
E380	O=C(OC)c1ccccc1S(=O)(=O)NC(=O)Nc2nc(nc(n2)C)OC	0	0	0	-
E381	O=C(N1CCCCCC1)SCC	0	1	0	-
E382	c1ccc(cc1)NC	0	0	1	-
E383	N#CC(c1ccc(cc1)Cl)(Cn2ncnc2)CCCC	0	0	0	-
E384	c1ccc(cc1)Nc2ccc(cc2)Nc3ccccc3	0	1	1	-
E385	O=P(OC)(OC)OC(C(Cl)(Cl)Br)Br	0	0	1	-
E386	c1ccc2ccccc2(c1)	0	1	1	-
E387	O=C(N(CC)CC)C(Oc1cccc2ccccc12)C	0	0	0	-
E388	O=[N+]([O-])c1ccccc1(N)	0	1	1	-
E389	O=[N+]([O-])N=C(N)N	0	1	1	Prediction Cliff
E390	O=[N+]([O-])c1ccccc1(O)	0	1	1	-
E391	O=[N+]([O-])c1cccc(c1)C	0	1	1	-
E392	CCCCCCCCC	0	0	0	-
E393	O=C1C(=C(C=NN1c2cccc(c2)C(F)(F)F)NC)Cl	0	0	0	-
E394	O=[N+]([O-])N1CN([N+](=O)[O-])CN([N+](=O)[O-])CN([N+](=O)[O-])C1	0	1	1	-
E395	O=P(OP(=O)(N(C)C)N(C)C)(N(C)C)N(C)C	0	1	1	-
E396	O=C(OCCCCCCCC)c1ccccc1(C(=O)OCCCCCCCC)	0	1	1	-
E397	O=[N+]([O-])c1cc(cc(c1N(CCC)CCC)[N+](=O)[O-])S(=O)(=O)N	0	0	0	-
E398	O=C1OC(=NN1c2cc(OC(C)C)c(cc2Cl)Cl)C(C)(C)C	0	0	0	-
E399	O=[N+]([O-])c2ccc(Oc1ccc(cc1Cl)C(F)(F)F)cc2(OCC)	0	1	0	-
E400	OC(C(n1ncnc1)Cc2ccc(cc2)Cl)C(C)(C)C	0	0	0	-
E401	c1c[n+](ccc1c2cc[n+](cc2)C)C	0	0	0	-
E402	O=C(N(CC)CCCC)SCCC	0	0	0	-
E403	O=[N+]([O-])c1cc(c(c(c1(NC(CC)CC))[N+](=O)[O-])C)C	0	0	1	-
E404	O(c1ccc(cc1Br)Br)c2cc(c(cc2Br)Br)Br	0	0	0	-
E405	c1c(c(c(c(c1Cl)Cl)Cl)Cl)Cl	0	1	1	-
E406	CCCCC	0	1	1	-
E407	O=S(=O)(O)C(F)(F)C(F)(F)C(F)(F)C(F)(F)F	0	1	0	-
E408	O=S(=O)(O)C(F)(F)C(F)(F)C(F)(F)C(F)(F)C(F)(F)C(F)(F)C(F)(F)C(F)(F)F	0	0	0	-
E409	O=C(O)C(F)(F)C(F)(F)C(F)(F)C(F)(F)C(F)(F)C(F)(F)C(F)(F)F	0	0	0	-
E410	O=C(OCc2cccc(Oc1ccccc1)c2)C3C(C=C(Cl)Cl)C3(C)(C)	0	0	0	-
E411	O=C(Oc1cccc(c1)NC(=O)OC)Nc2cccc(c2)C	0	0	0	-
E412	O=C(Oc1ccccc1(OC(C)C))NC	0	0	0	-
E413	c1ccc3c(c1)Nc2ccccc2S3	0	1	1	-
E414	C(=Nc1ccccc1)=S	0	1	0	-
E415	Nc1cccc(N)c1	0	0	1	-
E416	O(CC)P(OCC)(=S)SCSCC	0	0	0	-
E417	O=C(Cl)Cl	0	0	1	-
E418	O=C1c2ccccc2(C(=O)N1CSP(OC)(OC)=S)	0	0	0	-
E419	O=C(O)c1ccc(cc1)C(=O)O	0	0	0	-
E420	O=[N+]([O-])c1cc(N)c(O)c(c1)[N+](=O)[O-]	0	1	1	-
E421	O=[N+]([O-])c1cc(c(O)c(c1)[N+](=O)[O-])[N+](=O)[O-]	0	1	1	-
E422	n1c(OP(OC)(OC)=S)cc(nc1N(CC)CC)C	0	0	0	-
E423	O=[N+]([O-])c1cc(cc(c1N(CCC)CC2CC2)[N+](=O)[O-])C(F)(F)F	0	0	1	-
E424	n1c(nc(nc1NC(C)C)NC(C)C)OC	0	0	0	-
E425	n1c(nc(nc1NC(C)C)SC)NC(C)C	0	0	0	-
E426	O=C(N(c1ccccc1)C(C)C)CCl	0	0	0	-
E427	O=C(Nc1ccc(c(c1)Cl)Cl)CC	0	0	0	-
E428	O=S(OCC#C)OC2CCCCC2(Oc1ccc(cc1)C(C)(C)C)	0	0	0	-
E429	C#CCO	0	0	1	-
E430	n1c(nc(nc1NC(C)C)Cl)NC(C)C	0	1	1	-
E431	O=C(OC(C)C)Nc1ccccc1	0	1	1	-
E432	n1cnn(c1)CC2(OCC(O2)CCC)c3ccc(cc3Cl)Cl	0	0	0	-
E433	O=CCC	0	1	1	-
E434	c1ccc(cc1)CCC	0	1	1	-
E435	O=[N+]([O-])OCC(O[N+](=O)[O-])C	0	1	1	-
E436	OC(C)COCC	0	0	0	-
E437	OC(C)COC	0	0	0	-
E438	O=C(NC(C#C)(C)C)c1cc(cc(c1)Cl)Cl	0	1	1	-
E439	c1cc2ccc3cccc4ccc(c1)c2c34	0	1	1	-
E440	n1ccccc1	0	0	0	-
E441	n1cc(nc2ccccc12)OP(OCC)(OCC)=S	0	0	0	-
E442	O=C(OCC)C(Oc3ccc(Oc1nc2ccc(cc2(nc1))Cl)cc3)C	0	0	0	-
E443	O=C(OCc1coc(c1)Cc2ccccc2)C3C(C=C(C)C)C3(C)(C)	0	0	0	-
E444	O(c1cc(c(cc1Cl)Cl)Cl)P(OC)(OC)=S	0	0	0	-
E445	NC(N)=[Se]	0	1	0	-
E446	O=C1C(C(=O)CC(C1)CC(C)SCC)=C(NOCC)CCC	0	0	0	-
E447	O=C2N6c1ccccc1C57(CCN4CC3=CCOC(C2)C(C3CC45)C67)	0	0	1	-
E448	C=Cc1ccccc1	0	1	1	-
E449	O=S1(=O)(CCCC1)	0	1	1	-
E450	O=S(=O)(c1ccc(cc1)Cl)c2ccc(cc2)Cl	0	0	0	-
E451	C(CSCCCl)Cl	0	1	0	-
E452	N#CSCSc2nc1ccccc1s2	0	0	0	-
E453	O=C(NC)N(c1nnc(C(C)(C)C)s1)C	0	1	1	-
E454	O(c1ccc(cc1)Sc2ccc(OP(OC)(OC)=S)cc2)P(OC)(OC)=S	0	0	0	-
E455	O=C1NC(=C(C(=O)N1C(C)(C)C)Cl)C	0	0	0	-
E456	O(CC)P(OCC)(=S)SCSC(C)(C)C	0	0	0	-
E457	n1c(nc(nc1NC(C)(C)C)SC)NCC	0	0	0	-
E458	O(c1ccc(cc1Br)Br)c2ccc(cc2Br)Br	0	0	0	-
E459	c1c(c(cc(c1Cl)Cl)Cl)Cl	0	1	1	-
E460	Oc1c(cc(c(c1Cl)Cl)Cl)Cl	0	1	1	-
E461	O(CC)P(OCC)(OP(OCC)(OCC)=S)=S	0	0	0	-
E462	CC1(C)(CCCCC1(C)(C))	0	1	0	-
E463	O=[N+]([O-])c1cc(c(c(c1)[N+](=O)[O-])N([N+](=O)[O-])C)[N+](=O)[O-]	0	1	1	-
E464	O=C(OC)c1c(ccs1)S(=O)(=O)NC(=O)Nc2nc(nc(n2)C)OC	0	0	0	-
E465	O=C(N(CC)CC)SCc1ccc(cc1)Cl	0	0	0	-
E466	N#CS	0	0	0	-
E467	OCCSCCO	0	1	0	-
E468	O=C(N=C(CSC)C(C)(C)C)ONC	0	0	0	-
E469	O=C(OC)NC(Nc1ccccc1(NC(NC(=O)OC)=S))=S	0	0	0	-
E470	c1ccc(cc1)C	0	1	1	-
E471	O=C=Nc1ccc(c(N=C=O)c1)C	0	0	0	-
E472	Nc1cccc(N)c1C	0	1	1	-
E473	O=C=Nc1cccc(N=C=O)c1C	0	0	0	-
E474	N#CC(OC(=O)C1C(C(C(Br)(Br)Br)Br)C1(C)(C))c3cccc(Oc2ccccc2)c3	0	0	0	-
E475	O=C(OCC(OC(=O)C)COC(=O)C)C	0	0	0	-
E476	O=C(C(Oc1ccc(cc1)Cl)n2ncnc2)C(C)(C)C	0	0	0	-
E477	O=C(N(C(C)C)C(C)C)SCC(=C(Cl)Cl)Cl	0	1	1	-
E478	O=C(Nc1nc(nc(n1)C)OC)NS(=O)(=O)c2ccccc2(OCCCl)	0	0	0	-
E479	O=C(OC)c1ccccc1S(=O)(=O)NC(=O)N(c2nc(nc(n2)C)OC)C	0	0	0	-
E480	c1cc(c(cc1Br)Br)Br	0	0	0	-
E481	Oc1c(cc(cc1Br)Br)Br	0	0	0	-
E482	Oc2cc(ccc2(Oc1ccc(cc1Cl)Cl))Cl	0	0	0	-
E483	c1cc(c(c(c1)Cl)Cl)Cl	0	1	1	-
E484	Oc1cc(c(cc1Cl)Cl)Cl	0	1	1	-
E485	O=C(O)C(Oc1cc(c(cc1Cl)Cl)Cl)C	0	0	0	-
E486	CC(C(Cl)Cl)Cl	0	1	0	-
E487	C(=C(CCl)Cl)Cl	0	1	1	-
E488	c1cc(c(c(c1Cl)C)Cl)Cl	0	1	0	-
E489	c1cc(c(c(c1)Cl)CCl)Cl	0	0	0	-
E490	O1CC1(c2cc(cc(c2)Cl)Cl)CC(Cl)(Cl)Cl	0	0	1	-
E491	N(CC)(CC)CC	0	0	0	-
E492	FC(F)(F)C	0	0	0	-
E493	c1cc(c(c(c1)C)C)C	0	1	1	-
E494	c1c(cc(cc1C)C)C	0	1	1	-
E495	C=C(C)CC(C)(C)C	0	0	0	-
E496	O=P(c1ccccc1)(c2ccccc2)c3ccccc3	0	0	1	-
E497	O=P(OC(CCl)CCl)(OC(CCl)CCl)OC(CCl)CCl	0	0	0	-
E498	O=P(OC(C)CCl)(OC(C)CCl)OC(C)CCl	0	0	0	-
E499	O=P(OCCOCCCC)(OCCOCCCC)OCCOCCCC	0	0	0	-
E500	O=C(N(CCC)CCC)SCCC	0	0	0	-
E501	O=C1OC(C=C)(C(=O)N1c2cc(cc(c2)Cl)Cl)C	0	0	0	-
E502	O=C1Oc3ccccc3(C(O)=C1C(c2ccccc2)CC(=O)C)	0	0	0	-
E503	c1cc(ccc1C)C	0	1	1	-
E504	c1cc(cc(c1)C)C	0	1	1	-
E505	c1ccc(c(c1)C)C	0	1	1	-
