# Supplementary material for: Comparative machine learning and deep learning frameworks for robust carcinogenicity prediction and activity cliff analysis
Source: Royal Society of Chemistry journal article supplement (doi:10.1039/d5em01001b), 2026-01-01
Supplement: d5em01001b1.zip [file supplementary information available.docx]

**Supplementary Information available**

**Supplementary Information SI-1** contains the data set for modeling and external data set for predictions

**Supplementary Information SI-2** lists the definition of different molecular and RASAR descriptors.

**Supplementary Information SI-3** contains the code for the LR RASAR-ARKA model.
